# Supplementary material for: Using eugenol scaffold to explore the explosive sensing properties of Cd(ii)-based coordination polymers: experimental studies and real sample analysis
Source: Royal Society of Chemistry journal article supplement (doi:10.1039/d4dt01239a), 2024-01-01
Supplement: d4dt01239a1.pdf [file d4dt01239a1.pdf]

## **Electronic Supporting Information (ESI)**

# **Use of Eugenol scaffold to Explore Explosive Sensing Properties of Cd(II) Based Coordination Polymers : Experimental Studies and Real Sample Analysis**

Suvamoy Malik,<sup>1,a</sup> Udayan Mondal,<sup>1,b,c</sup> Narayan Ch. Jana,<sup>d</sup> Priyabrata Banerjee<sup>\*,b,c</sup> and Amrita Saha,<sup>\*a</sup>

<sup>a</sup> Department of Chemistry, Jadavpur University, Kolkata- 700032, India.

E-mail: [amritasahachemju@gmail.com](mailto:amritasahachemju@gmail.com); [amrita.saha@jadavpuruniversity.in](mailto:amrita.saha@jadavpuruniversity.in);

<sup>b</sup> Electric Mobility and Tribology Research Group, CSIR-Central Mechanical Engineering Research Institute, Durgapur, West Bengal 713209, India, Email: [pr\\_banerjee@cmeri.res.in](mailto:pr_banerjee@cmeri.res.in); Webpage: [www.cmeri.res.in](http://www.cmeri.res.in); [www.priyabratabanerjee.in](http://www.priyabratabanerjee.in).

<sup>c</sup> Academy of Scientific and Innovative Research (AcSIR), Ghaziabad, Uttar Pradesh 201002, India

<sup>d</sup> School of Chemical Sciences, National Institute of Science Education and Research (NISER), Jatni, Khurda, Bhubaneswar, Odisha, PIN 752050, India.

\*Corresponding Authors

<sup>1</sup> contributed equally as first authors.

---

| Sl. No. | Contents                                                                                                                                                            | Page No. |
|---------|---------------------------------------------------------------------------------------------------------------------------------------------------------------------|----------|
| 1       | <b>Scheme S1</b> Synthesis route of <b>HL</b>                                                                                                                       | S4       |
| 2       | <b>Fig. S1</b> ESI-mass spectrum of <b>HL</b> in CH <sub>3</sub> OH solvent.                                                                                        | S4       |
| 3       | <b>Fig. S2</b> IR spectrum of <b>HL</b>                                                                                                                             | S5       |
| 4       | <b>Fig. S3-S4</b> <sup>1</sup> H and <sup>13</sup> C NMR spectrum of <b>HL</b> CDCl <sub>3</sub> solvent.                                                           | S5-S6    |
| 5       | <b>Fig. S5-S6</b> IR spectrum of CP <b>1</b> and CP <b>2</b>                                                                                                        | S6-S7    |
| 6       | <b>Fig. S7-S8</b> Experimental and simulated PXRD pattern <b>1</b> and <b>2</b>                                                                                     | S7-S8    |
| 7       | <b>Fig. S9</b> water stability of CPs <b>1</b> and <b>2</b> through PXRD                                                                                            | S8       |
| 8       | <b>Fig. S10-S11</b> Thermo Gravimetric Analysis of CP <b>1</b> and <b>2</b>                                                                                         | S9       |
| 9       | <b>Fig. S12-S13</b> Different supramolecular interactions of <b>1</b>                                                                                               | S10      |
| 10      | <b>Fig. S14-S15</b> Different supramolecular interactions of <b>2</b>                                                                                               | S11      |
| 11      | <b>Fig. S16-S17</b> The repeating cage of the polymeric chain of CP <b>1</b> and <b>2</b>                                                                           | S12      |
| 12      | <b>Fig. S18</b> The non-planar nature of the ligand <b>HL</b>                                                                                                       | S13      |
| 13      | <b>Fig. S19</b> UV-Vis absorption spectra of ligand <b>HL</b> , CP <b>1</b> and <b>2</b>                                                                            | S13      |
| 14      | <b>Fig. S20</b> Emission profile of <b>HL</b>                                                                                                                       | S14      |
| 15      | <b>Fig. S21</b> Emission profile of CP <b>1</b>                                                                                                                     | S14      |
| 16      | <b>Fig. S22</b> Emission profile of CP <b>2</b>                                                                                                                     | S15      |
| 17      | <b>Fig. S23</b> Excitation dependent fluorescence profile of CP <b>1</b> and <b>2</b>                                                                               | S15      |
| 18      | <b>Fig. S24</b> Solid phase emission profile of CP <b>1</b> and <b>2</b>                                                                                            | S16      |
| 19      | <b>Fig. S25-S26</b> Photostability of the CP <b>1</b> and <b>2</b>                                                                                                  | S16-S17  |
| 20      | <b>Fig. S27</b> Emission profile of <b>1</b> upon gradual addition of NACs                                                                                          | S17-S18  |
| 21      | <b>Fig. S28</b> Comparative quenching efficiency ( <i>QE</i> ) of NACs towards <b>1</b>                                                                             | S19      |
| 22      | <b>Fig. S29</b> Emission profile of CP <b>2</b> upon gradual addition of other NACs                                                                                 | S19-S20  |
| 23      | <b>Fig. S30</b> Comparative <i>QE</i> % of the NACs towards the luminescence profile of <b>2</b>                                                                    | S21      |
| 24      | <b>Fig. S31</b> Quenching Effect of water on the emission profile of <b>1</b> and <b>2</b>                                                                          | S21      |
| 25      | <b>Fig. S32-S33</b> Competitive Analyte Test (CAT) for CP <b>1</b> and <b>2</b>                                                                                     | S21-S22  |
| 26      | <b>Fig. S34</b> Fast Responsive Analyte (FRA) test <b>1</b> (a) and <b>2</b> (b).                                                                                   | S22      |
| 27      | <b>Fig. S35-S36</b> Five consecutive Blank measurements of <b>1</b> and <b>2</b>                                                                                    | S22-S23  |
| 28      | <b>Fig. S37-S38</b> Evaluation of slope ( <i>k</i> ) used in $3\sigma/k$ equation for <b>1</b> and <b>2</b>                                                         | S24      |
| 29      | <b>Fig. S39-S40</b> Stern-Volmer (S-V) plot [ $I_0/I - 1$ vs Concentration] of compound <b>1</b> and <b>2</b> ; and evaluation of quenching constants ( $K_{SV}$ ). | S25-S26  |
| 30      | <b>Fig. S41</b> Lifetime decay profile of <b>1</b> and <b>2</b> upon interaction with TNP                                                                           | S26      |
| 31      | <b>Fig. S42-43</b> Vapor phase TNP sensing study for <b>1</b> and <b>2</b>                                                                                          | S27-S28  |
| 32      | <b>Fig. S44</b> Recyclable behaviour of the sensors <b>1</b> and <b>2</b>                                                                                           | S28      |
| 33      | <b>Fig. S45</b> Powder XRD pattern of <b>1</b> , <b>2</b> , <b>1</b> + TNP and <b>2</b> + TNP                                                                       | S28      |
| 34      | <b>Fig. S46-S47</b> N <sub>2</sub> adsorption-desorption isotherm of <b>1</b> and <b>2</b> before and after TNP sensing study                                       | S29      |
| 35      | <b>Fig. S48-S49</b> Absorption spectra of <b>1</b> and <b>2</b> during gradual addition of TNP                                                                      | S29-S30  |

|    |                                                                                                                                                                                                                   |         |
|----|-------------------------------------------------------------------------------------------------------------------------------------------------------------------------------------------------------------------|---------|
| 36 | <b>Fig. S50</b> Graphical depiction of comparative HOMO, LUMO energy levels of NACs.                                                                                                                              | S35     |
| 37 | <b>Fig. S51</b> Geometry optimized structure of the HL•••TNP adduct                                                                                                                                               | S36     |
| 38 | <b>Fig. S52</b> Quenching of <b>1</b> during incremental addition of 10 <sup>-4</sup> (M) TNP at diverse complex matrices: MSPS, RW, SW and SSS.                                                                  | S37     |
| 39 | <b>Fig. S53</b> Linear range of ( $I_0/I - 1$ ) vs Concentration plot for calculation of $K_{SV}$ for fluorescence quenching of <b>1</b> by MSPS, RW, SW and SSS.                                                 | S37-S38 |
| 40 | <b>Fig. S54</b> Quenching of <b>2</b> during incremental addition of 10 <sup>-4</sup> (M) TNP at diverse complex matrices: (a) MSPS; (b) RW; (c) SW and (d) SSS.                                                  | S38     |
| 41 | <b>Fig. S55</b> Linear range of ( $I_0/I - 1$ ) vs Concentration plot for calculation of $K_{SV}$ for fluorescence Quenching of <b>2</b> by complex environmental matrices: (a) MSPS; (b) RW; (c) SW and (d) SSS. | S39     |
| 42 | <b>Table S1</b> Calculation of Standard Deviation ( $\sigma$ )                                                                                                                                                    | S23     |
| 43 | <b>Table S2</b> Calculation of limit of detection ( $LOD$ )                                                                                                                                                       | S24     |
| 44 | <b>Table S3</b> Calculation of IFE% for TNP on the fluorescence profile of CP <b>1</b>                                                                                                                            | S30     |
| 45 | <b>Table S4</b> Contribution of IFE% of TNP on the fluorescence profile of CP <b>2</b>                                                                                                                            | S31     |
| 46 | <b>Table S5</b> HOMO, LUMO energies, orbital images of the NACs, CPs, HL, <b>1</b> •••TNP, <b>2</b> •••TNP adducts                                                                                                | S31-S35 |
| 47 | <b>Table S6</b> Preparation of complex environmental matrices (CEMs)                                                                                                                                              | S36     |
| 48 | <b>Table S7</b> Crystal parameters and selected refinement details for CPs <b>1</b> and <b>2</b> .                                                                                                                | S39-S40 |
| 49 | <b>Table S8</b> Selected Bond lengths ( $\text{\AA}$ ) and Bond angles ( $^\circ$ ) for CPs <b>1</b> and <b>2</b> .                                                                                               | S40-S41 |
| 50 | <b>Table S9</b> Comparison table                                                                                                                                                                                  | S41-S43 |

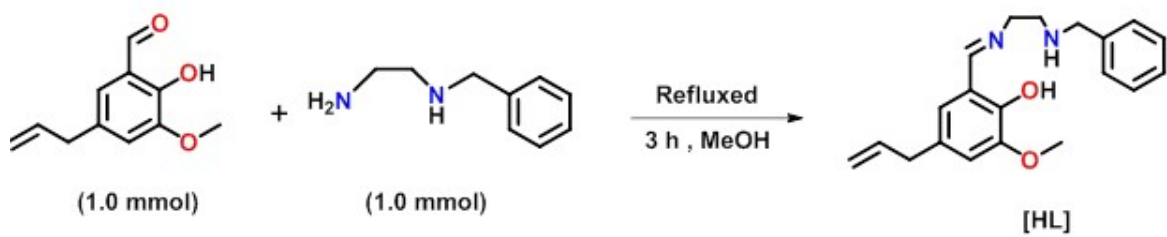

**Scheme S1.** Synthesis route of **HL**

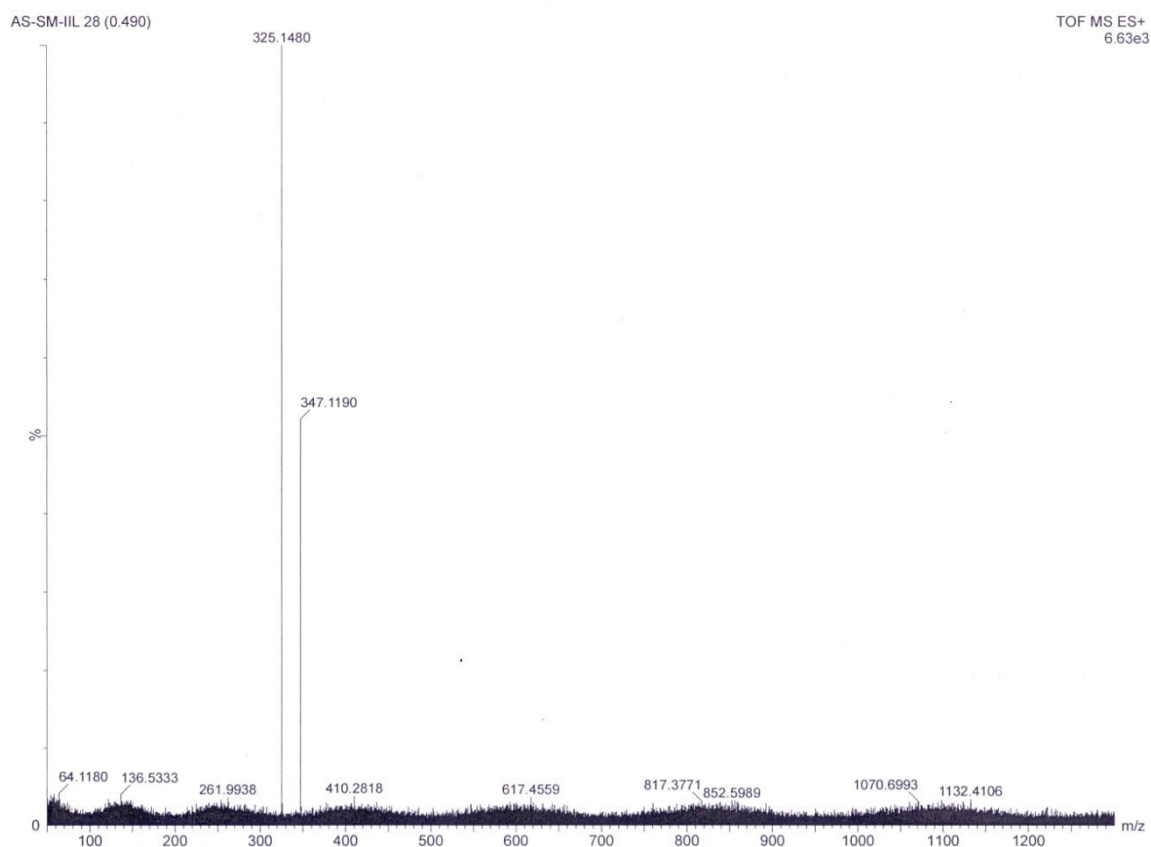

**Fig. S1** ESI-mass spectrum of **HL** in  $\text{CH}_3\text{OH}$  solvent.

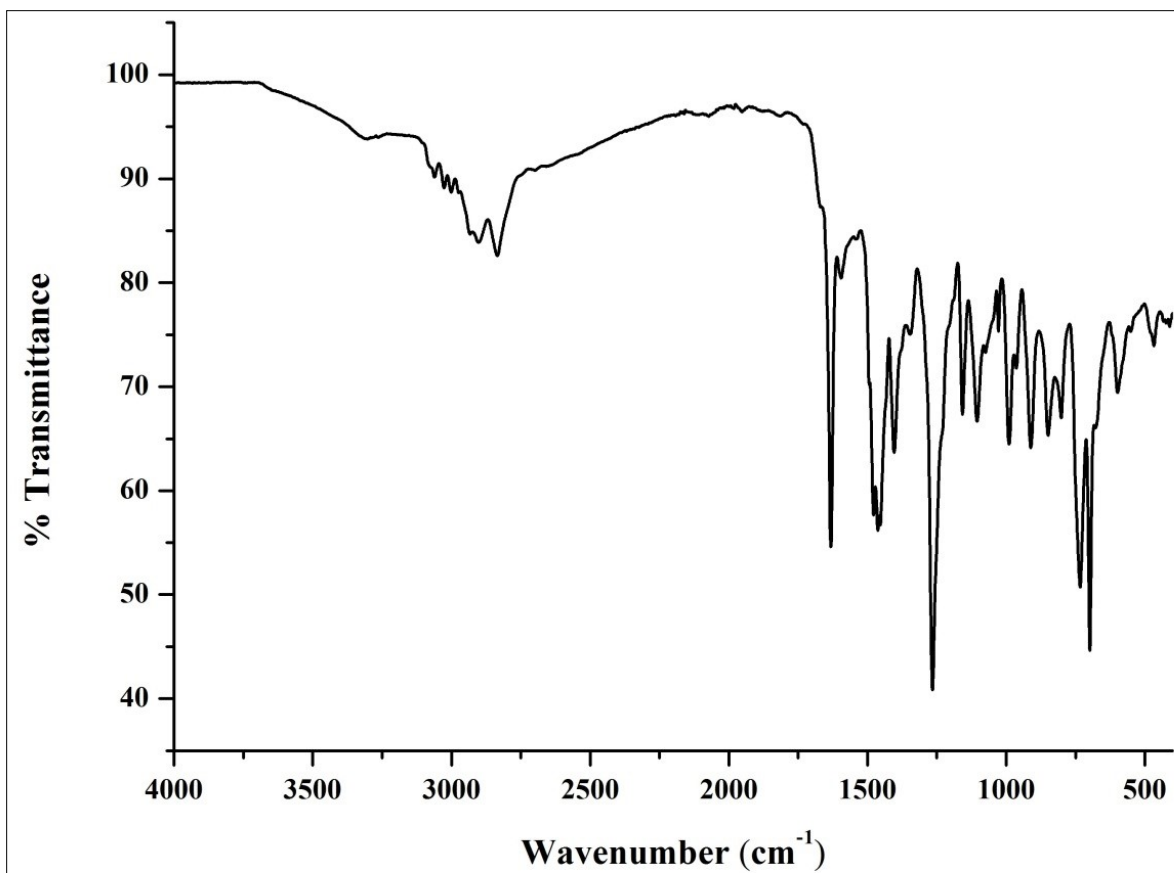

Fig. S2 IR spectrum of HL

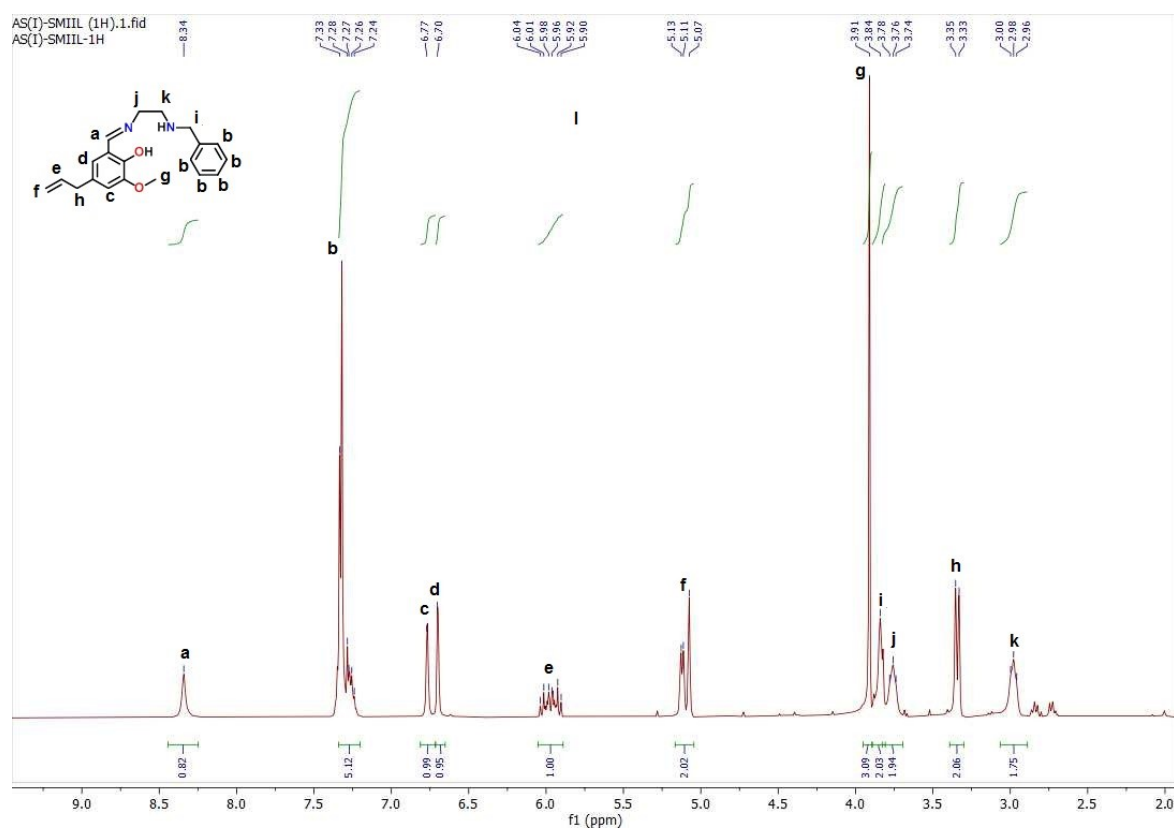

Fig. S3 <sup>1</sup>H NMR of HL in CDCl<sub>3</sub> solvent.

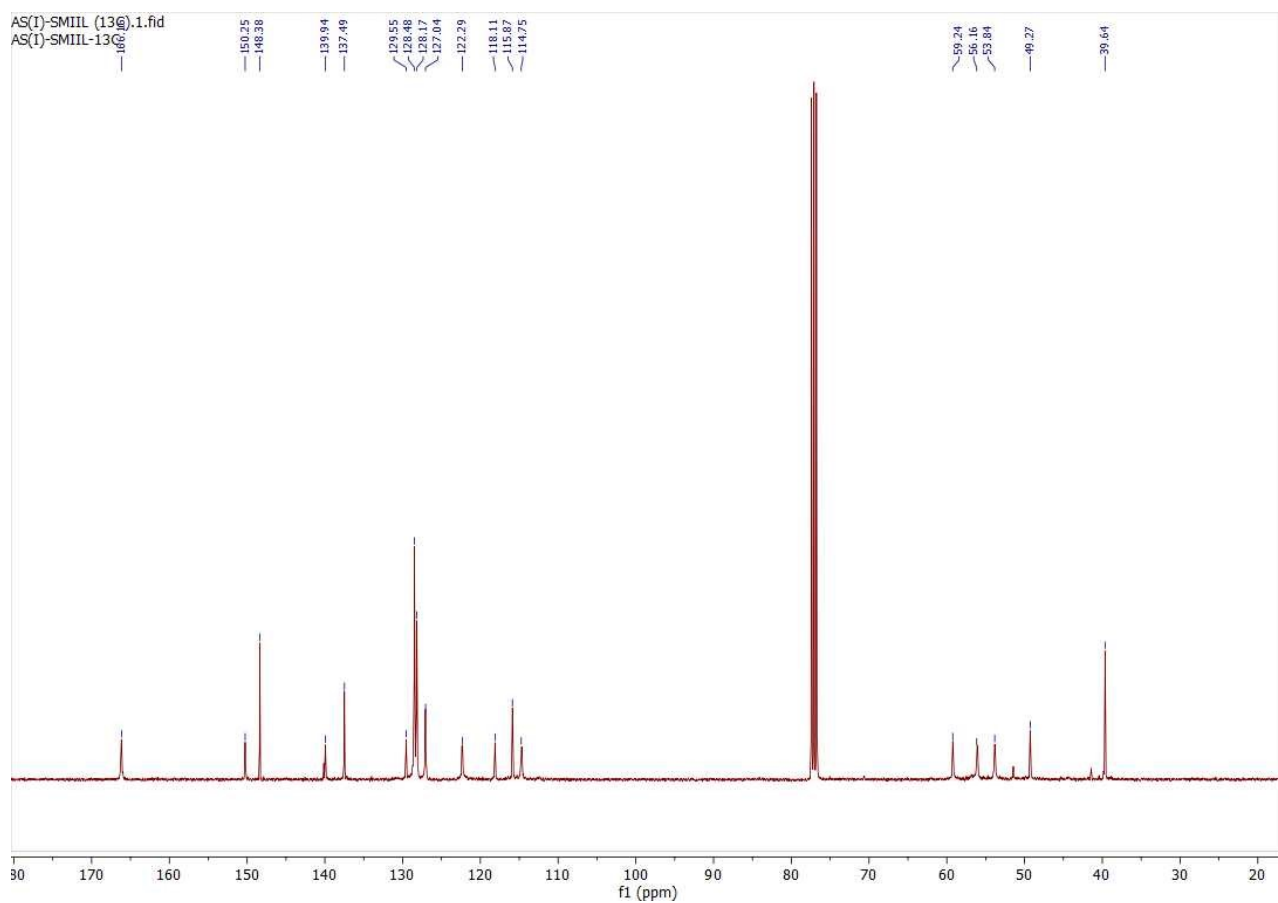

**Fig. S4**  $^{13}\text{C}$  NMR of **HL** in  $\text{CDCl}_3$  solvent.

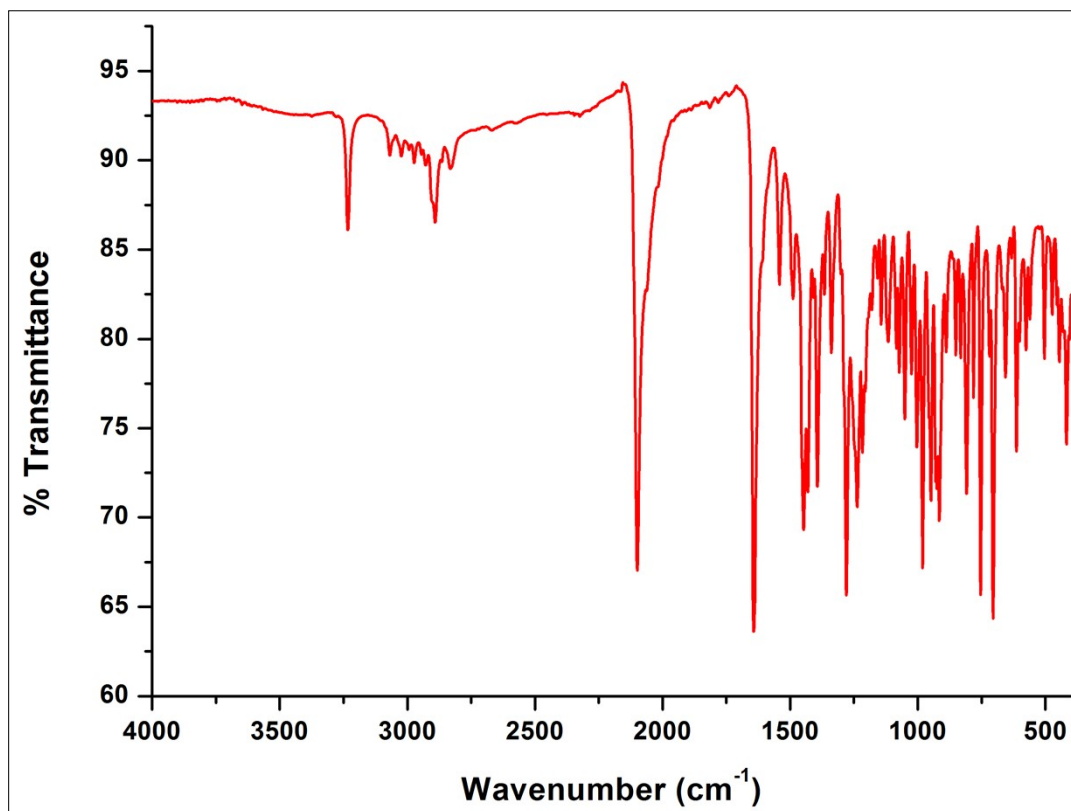

**Fig. S5** IR spectrum of **CP 1**

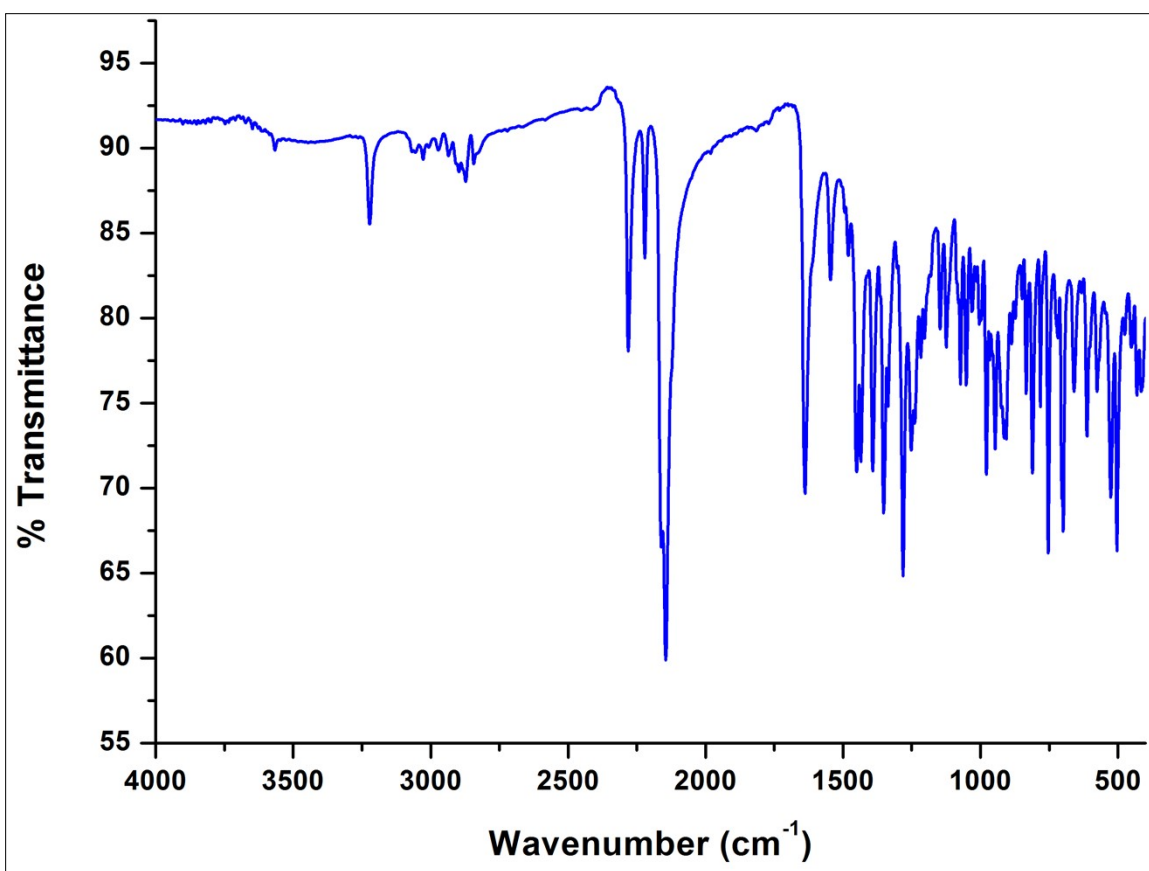

Fig. S6 IR spectrum of CP 2

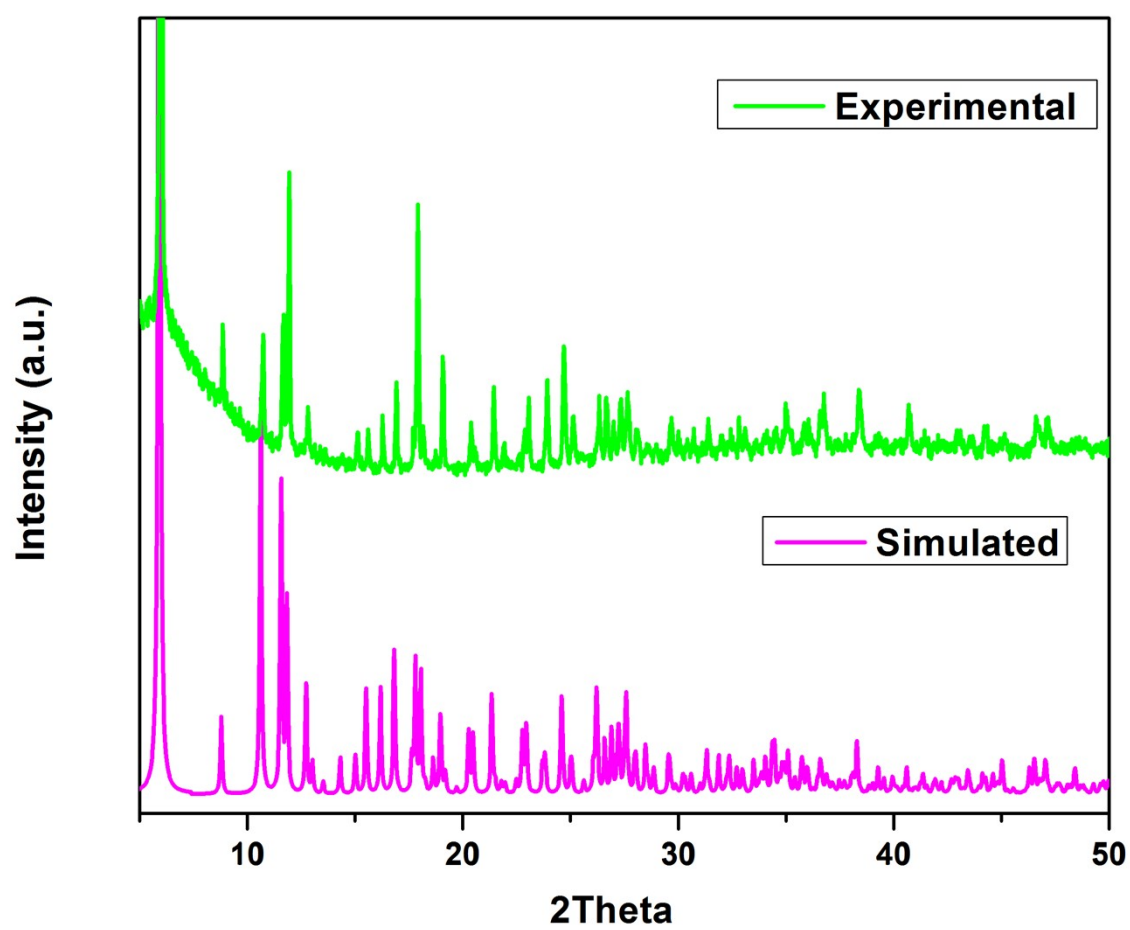

Fig. S7 Experimental and simulated PXRD pattern of 1

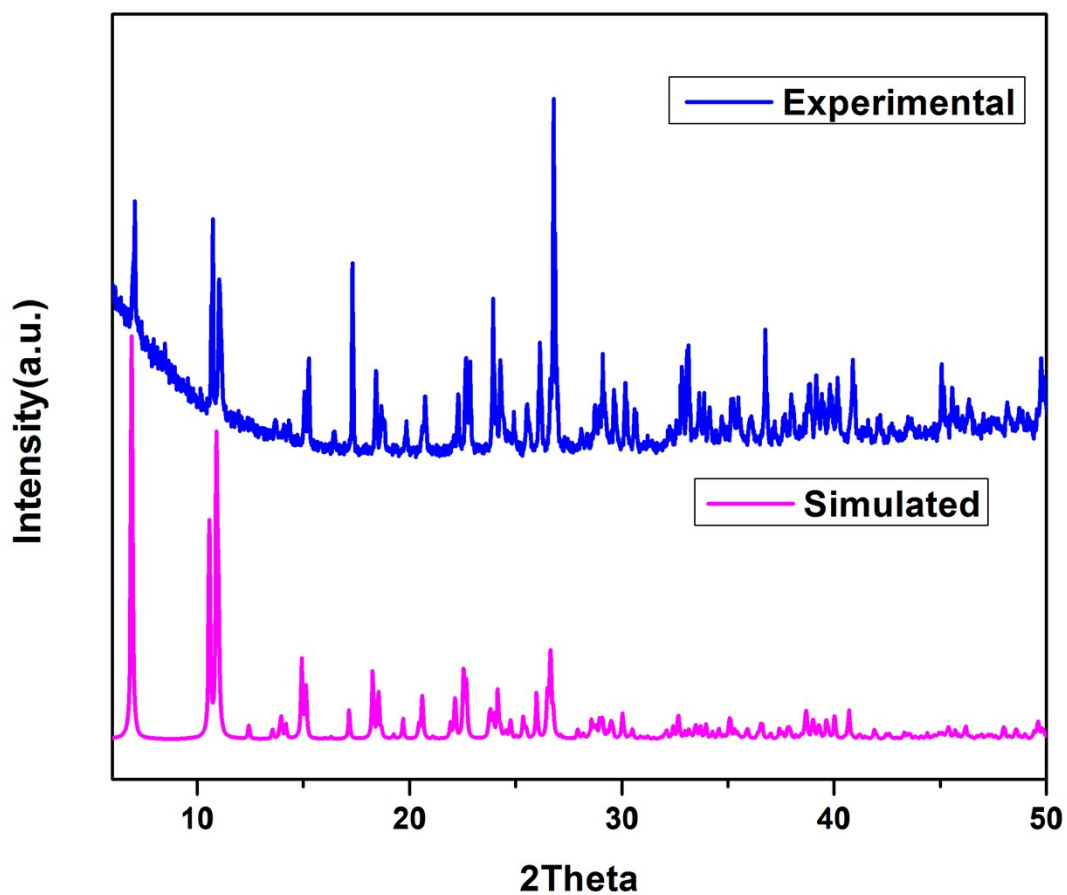

Fig. S8 Experimental and simulated PXRD pattern of 2

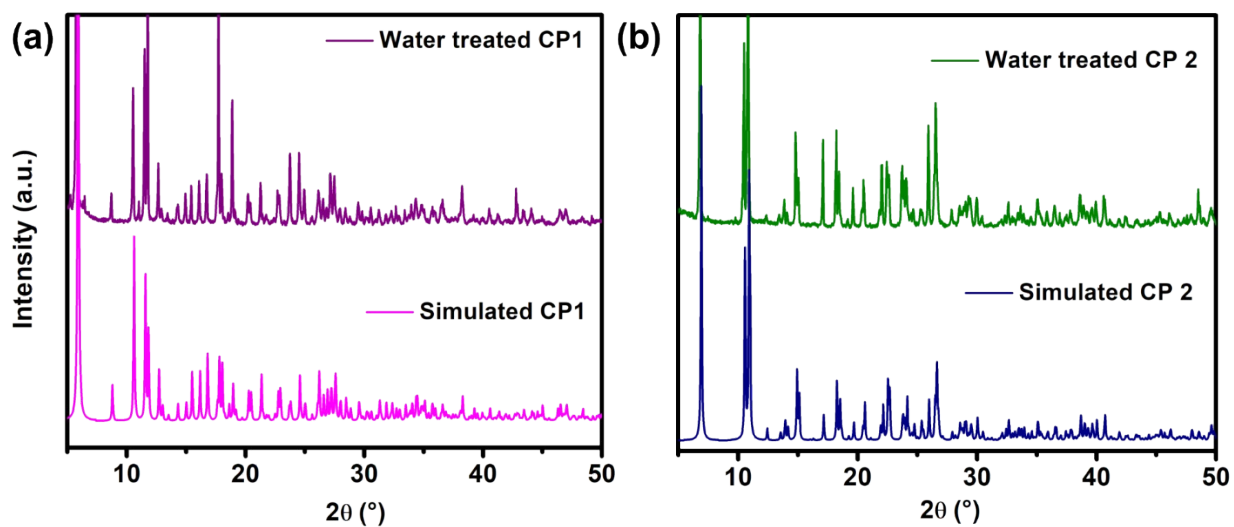

Fig. S9. Examining the water stability of the as-synthesized CPs (1, 2) through PXRD.



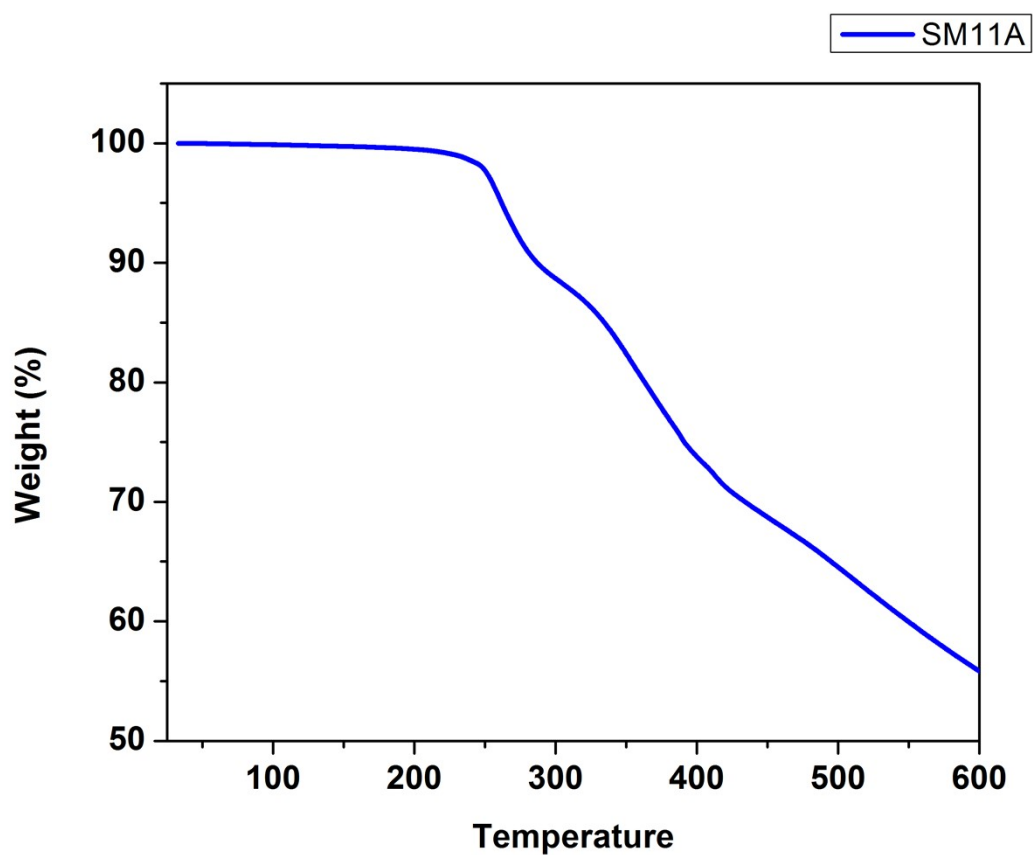

**Fig. S10** Thermo Gravimetric Analysis of CP 1 under nitrogen atmosphere showing stability of complex is very appreciable up to 235°C.

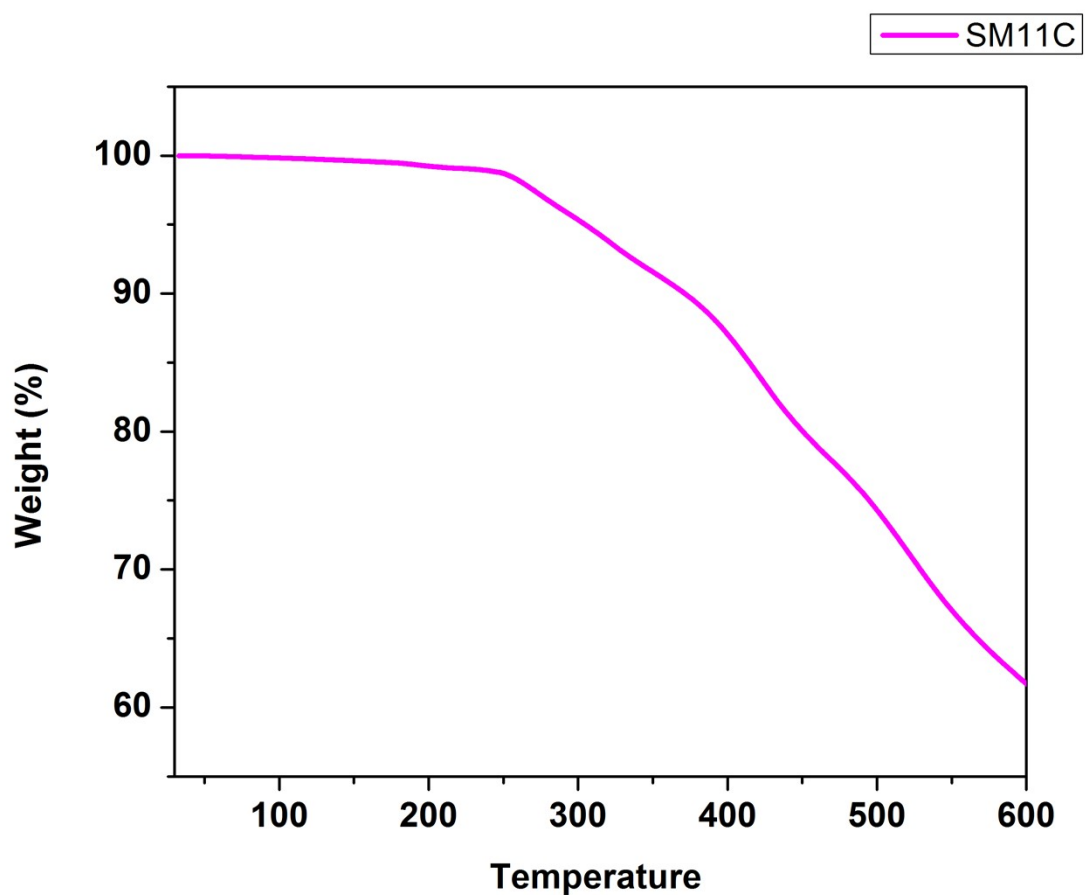

**Fig. S11** Thermo Gravimetric Analysis of CP 2 under nitrogen atmosphere showing stability of complex is very appreciable up to 250°C.

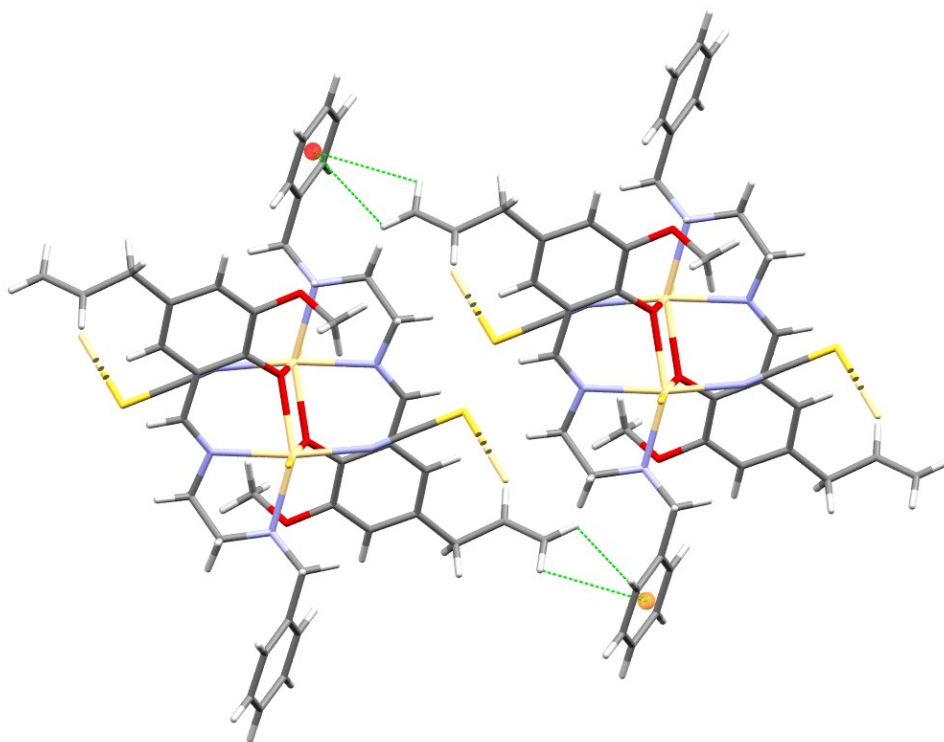

**Fig. S12** Intermolecular C-H $\cdots$  $\pi$  interaction of CP **1**

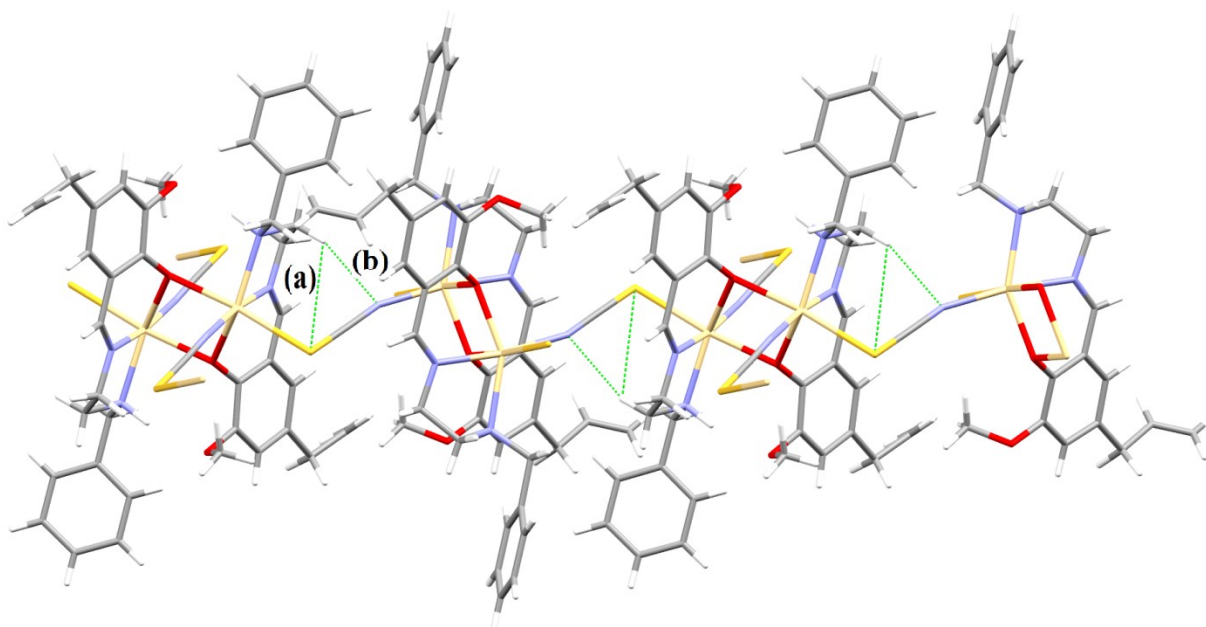

**Fig. S13** Intramolecular (a) C-H $\cdots$ S (3.319 Å) and (b) C-H $\cdots$ N (2.563 Å) interaction of CP **1**

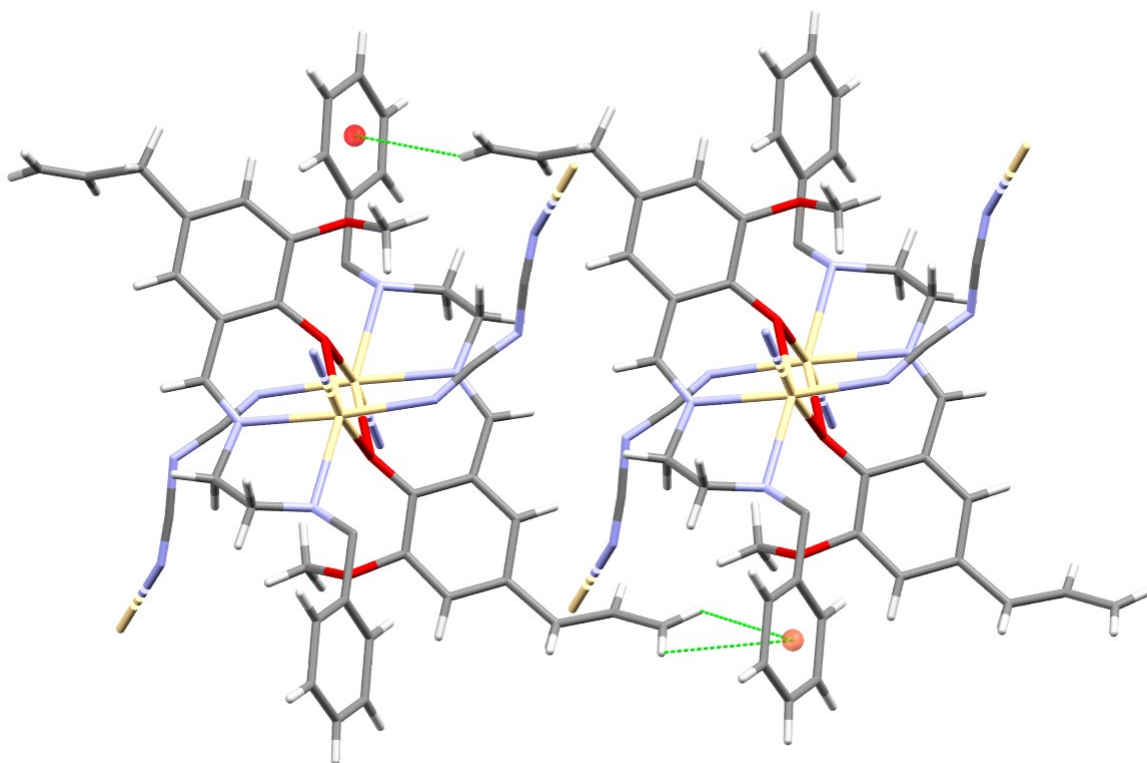

**Fig. S14** Intermolecular C-H $\cdots$  $\pi$  interaction of CP 2

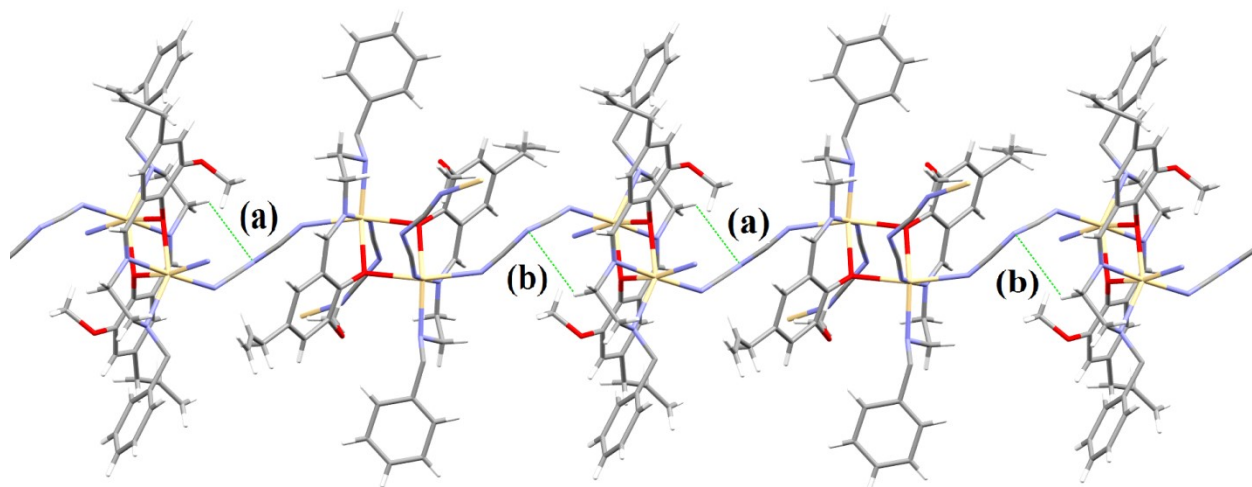

**Fig. S15** Intramolecular (a) C-H $\cdots$ N (3.305 Å) and (b) C-H $\cdots$ N (3.178 Å) interaction of CP 2

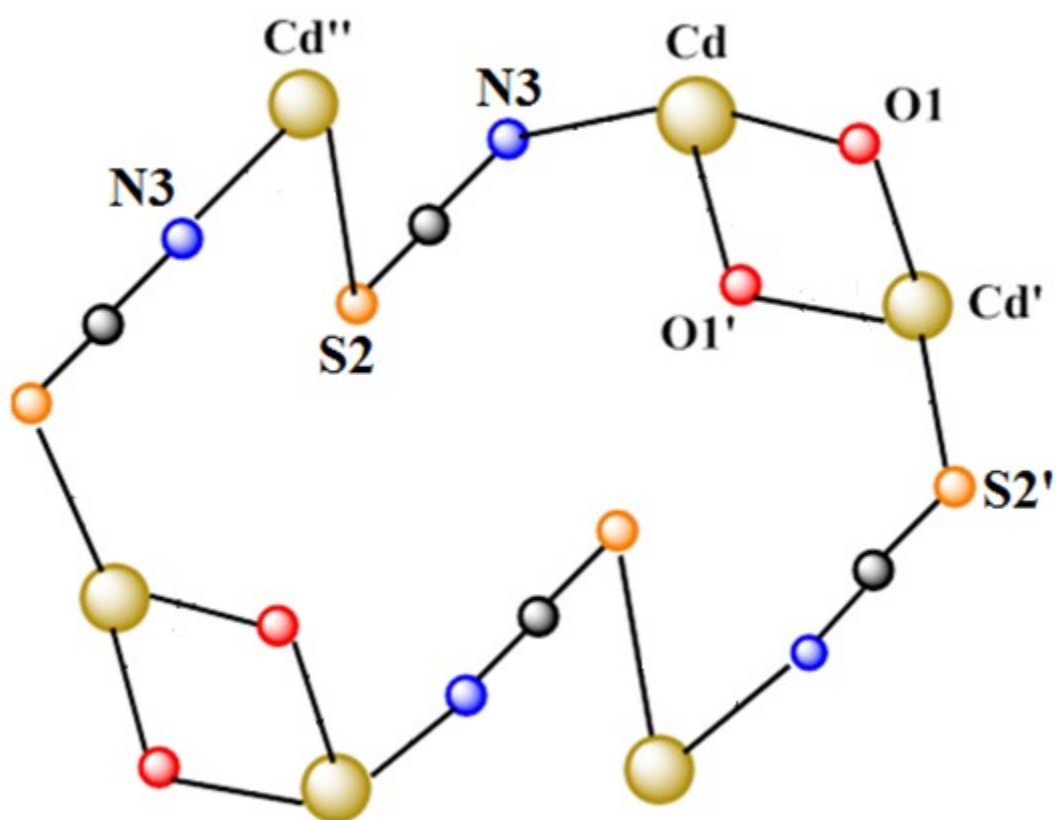

**Fig. S16.** The repeating cage of the polymeric chain of CP1. (Symmetry code: Cd ':  $x, 1.5-y, 1/2+z$ ; S2':  $1-x, 1/2+y, 1.5-z$ ; O1':  $x, 1.5-y, 1/2+z$ ; Cd '':  $1-x, 1-y, 1-z$ ; N3:  $1-x, 2-y, 1-z$ ).

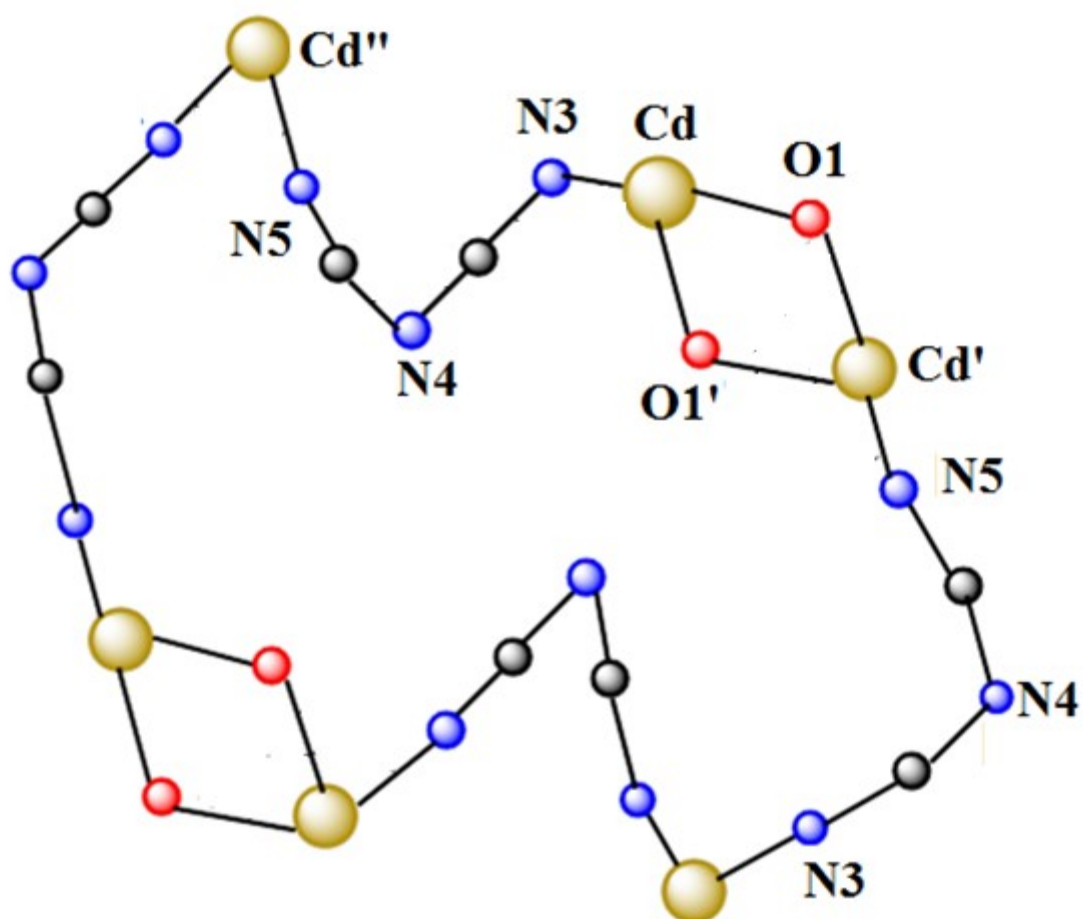

**Fig. S17.** The repeating cage of the polymeric chain of CP2. (Symmetry code: Cd ':  $x, 1+y, z$ ; O1':  $x, 1+y, z$ ; Cd '':  $1/2+x, 1-y, 1/2+z$ ; N5:  $1/2+x, 1-y, 1/2+z$ ).

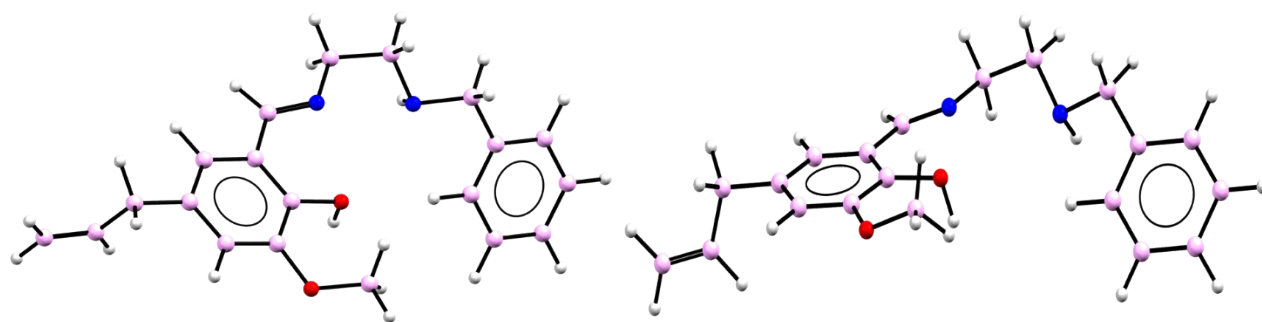

**Fig. S18.** The non-planar nature of the ligand **HL**

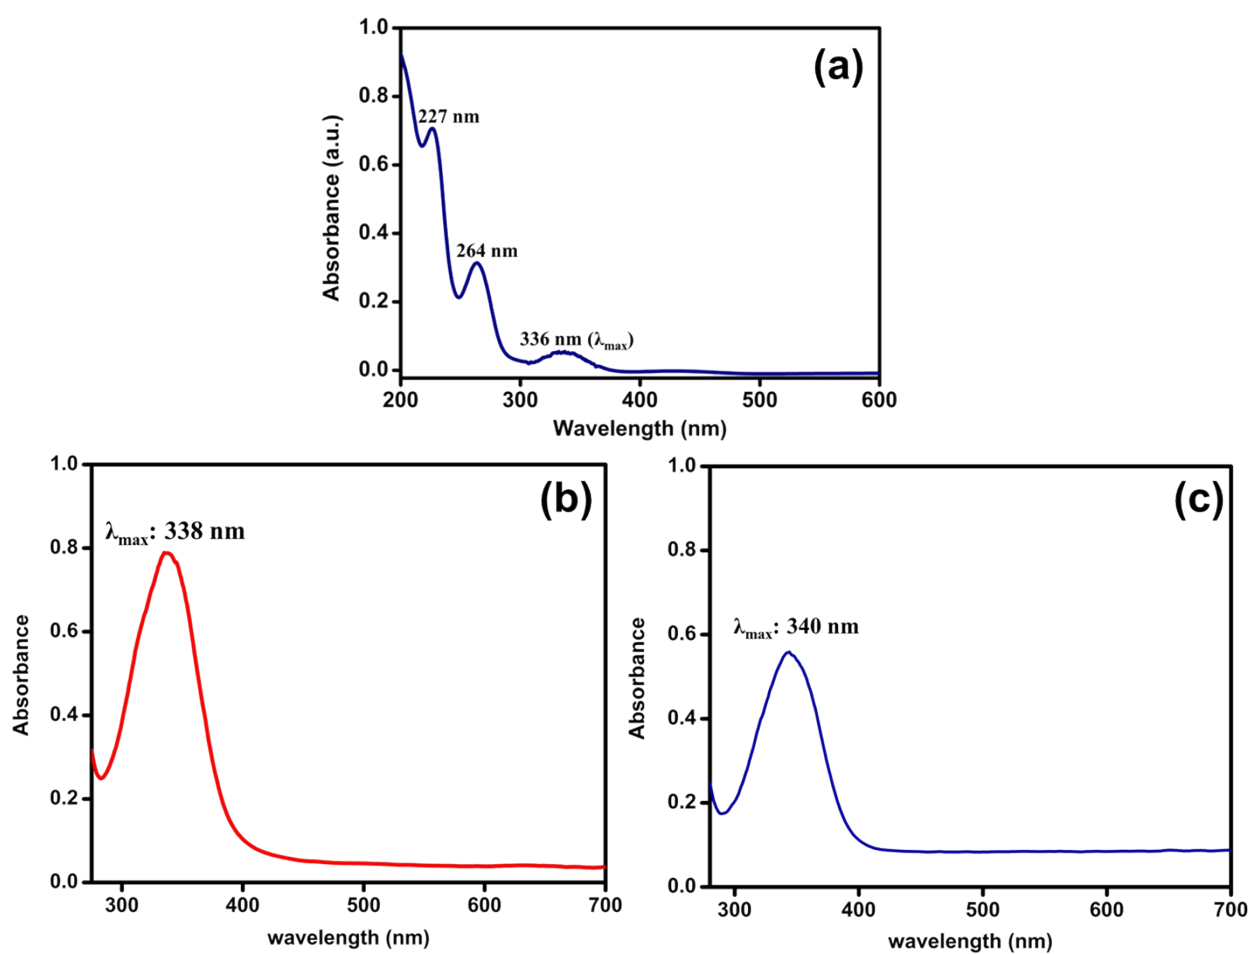

**Fig. S19** UV-Vis absorption spectra of ligand **HL** (a), and acetonitrile dispersion of CP **1** (b) and **2** (c).

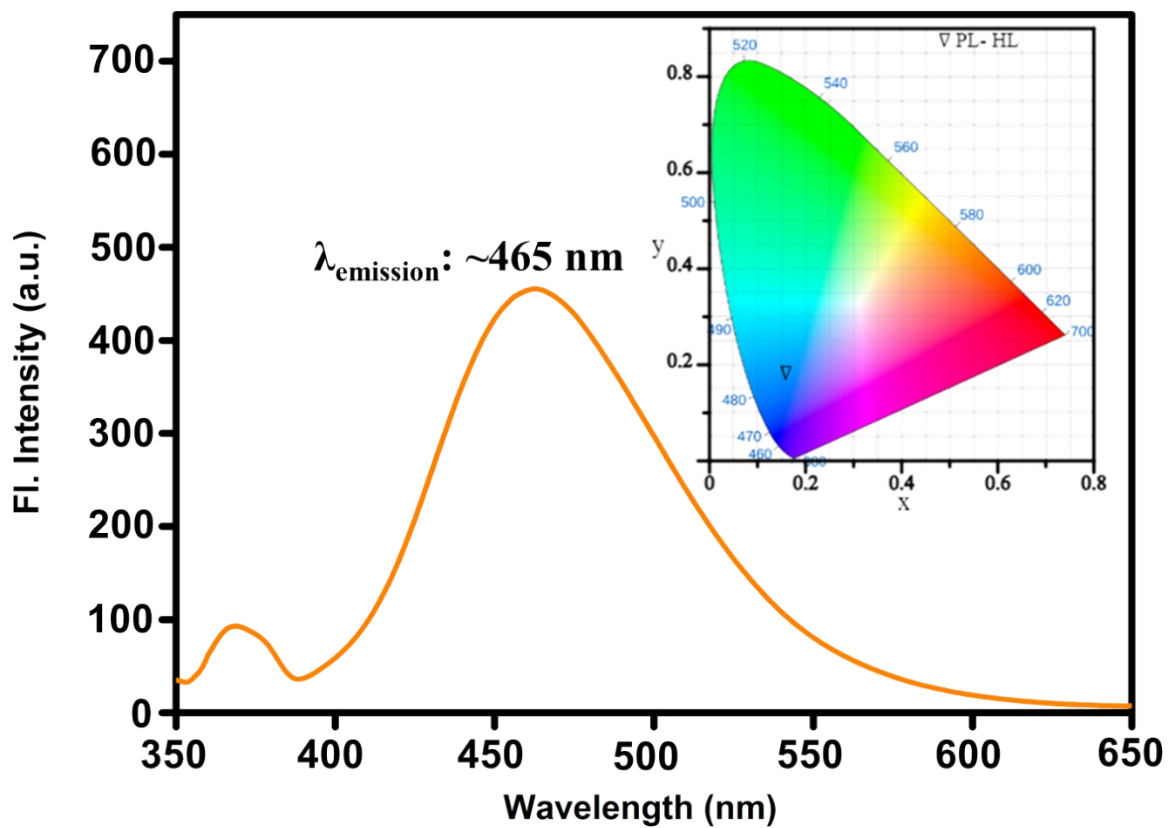

Fig. S20 Emission profile of HL [inset: CIE 1931 chromaticity diagram]

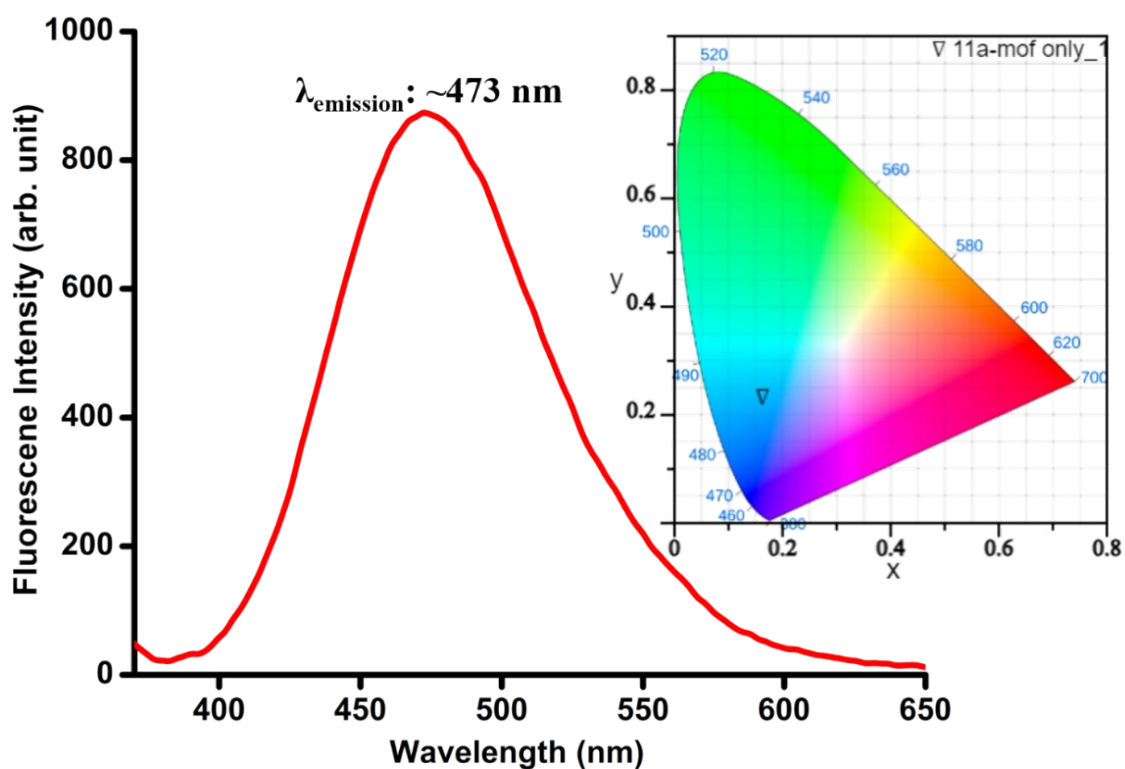

Fig. S21 Emission profile of CP 1 (dispersed in acetonitrile,  $\lambda_{\text{excitation}}$ : 340 nm) and CIE 1931 chromaticity diagram depicting its blue fluorescence.

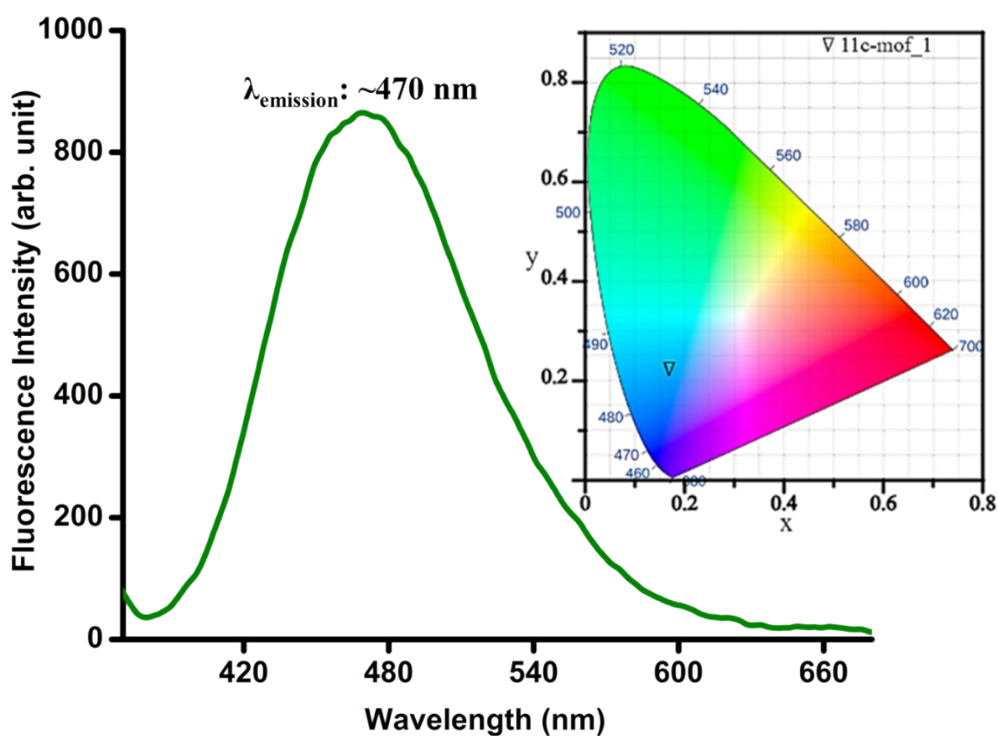

**Fig. S22** Emission profile of CP 2 (dispersed in acetonitrile,  $\lambda_{\text{excitation}}$ : 340 nm) and CIE 1931 chromaticity diagram depicting its blue fluorescence.

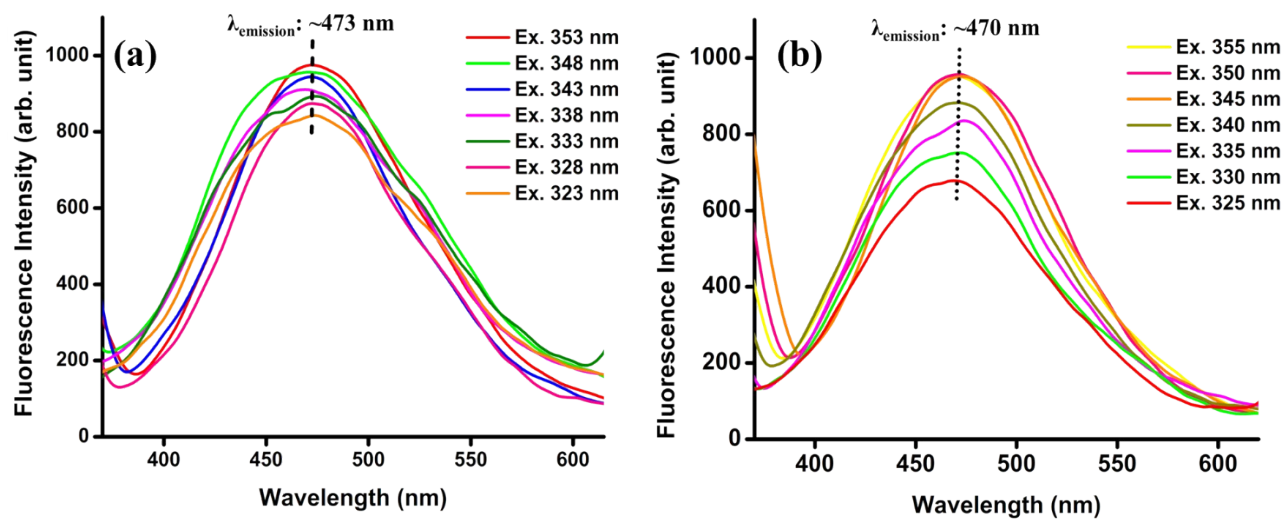

**Fig. S23** Excitation dependent fluorescence profile of CP 1 and 2 : determination of true emission peak.

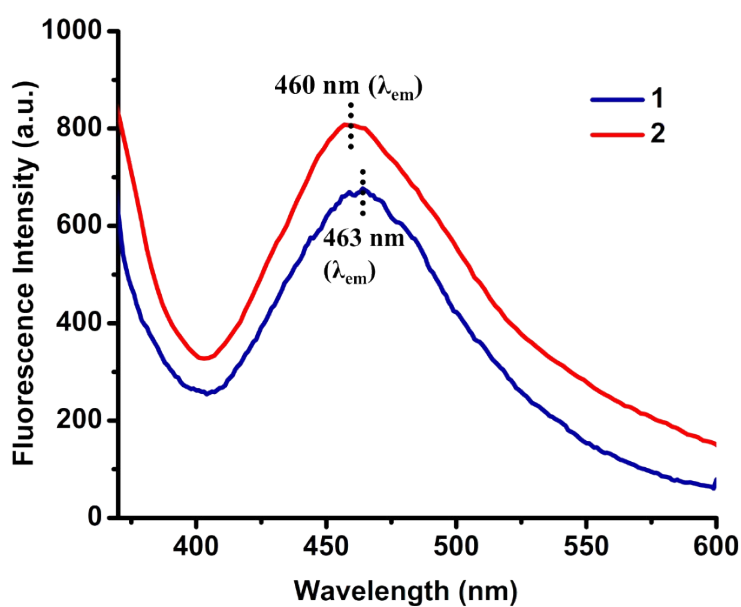

Fig. S24 Solid phase emission profile of powdered CP 1 and 2.

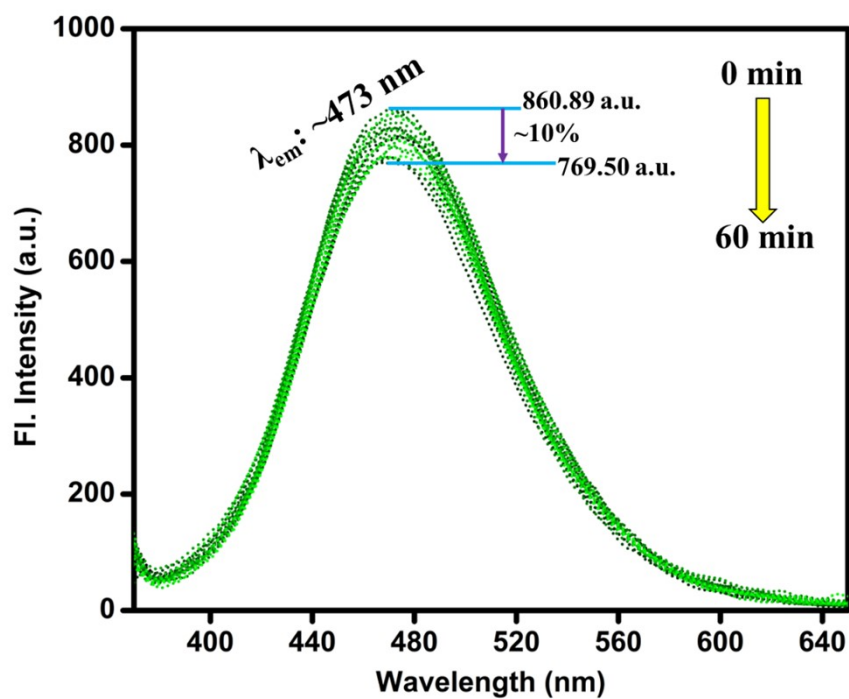

Fig. S25 Inspection of appropriate homogenization and photostability of the CP 1 - acetonitrile dispersion at continuous  $\lambda_{\text{excitation}}$ : 340 nm for a time period 0-60 minutes.



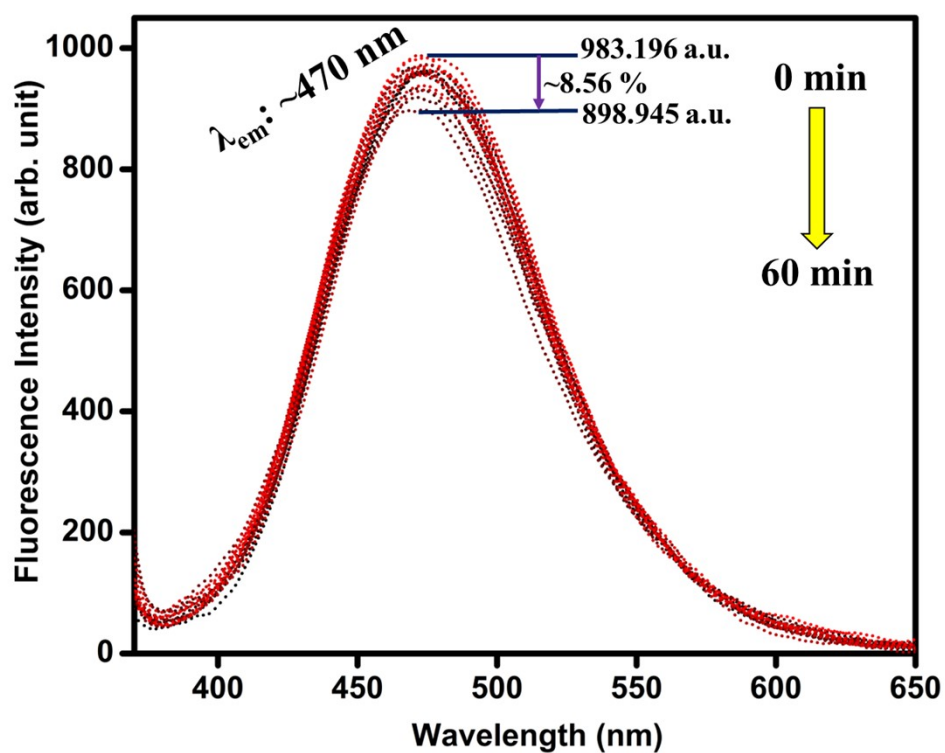

Fig. S26 Inspection of appropriate homogenization and photostability of the CP 2 - acetonitrile dispersion at continuous  $\lambda_{excitation}$ : 340 nm for a time period of 0-60 minutes.

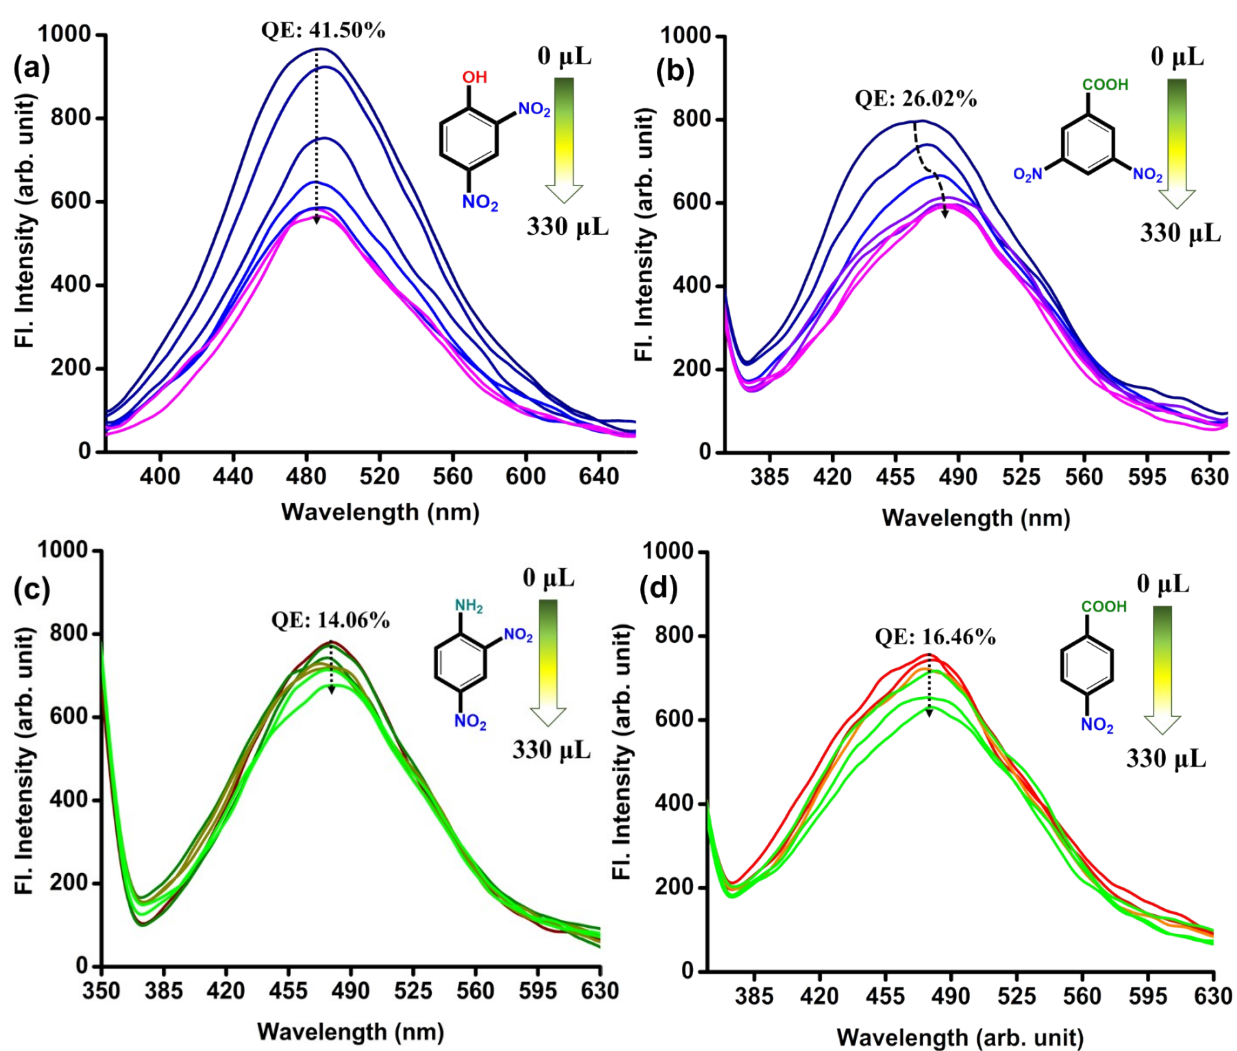

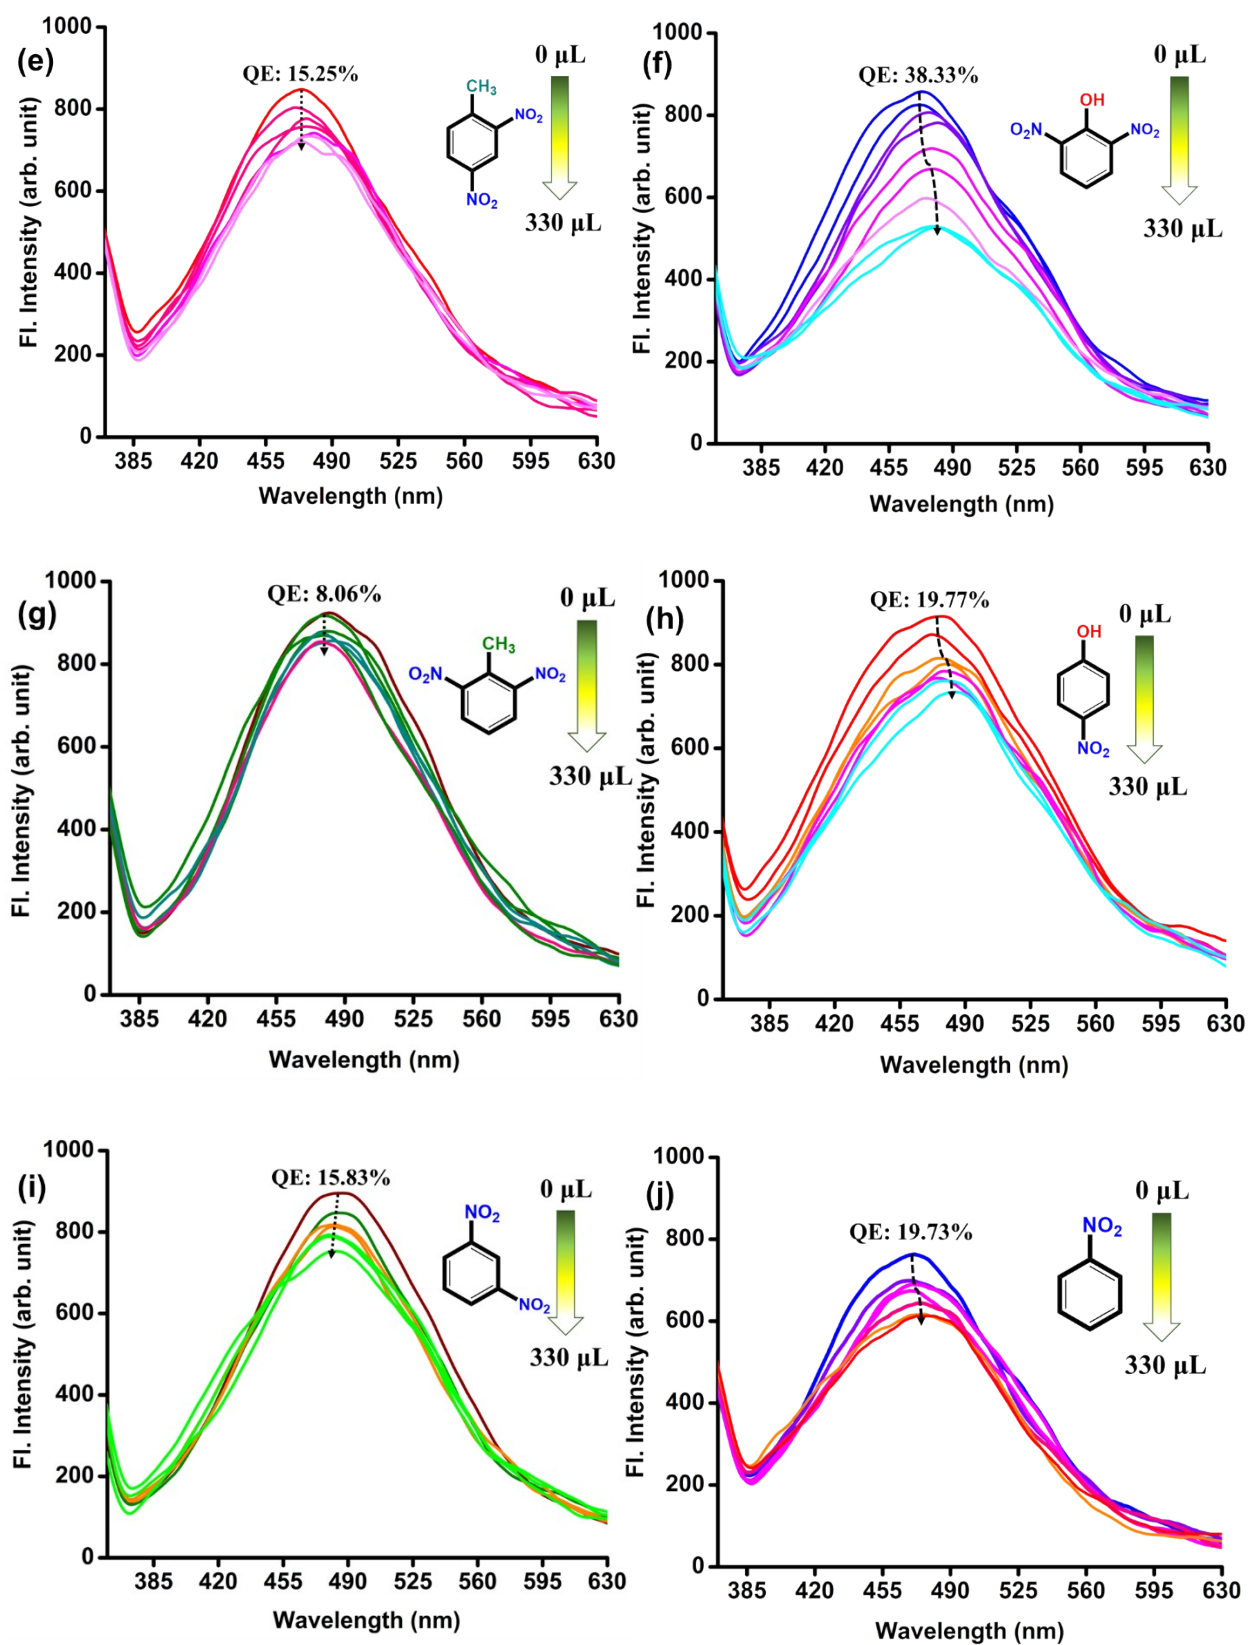

**Fig. S27.** Emission profile of 1-acetonitrile dispersion upon gradual addition of  $10^{-4}$  M aq. solution of other nitro-analytes (NACs): (a) 2,4-DNP, (b) DNBA, (c) DNA, (d) NBA, (e) DNT, (f) 2,6-DNP, (g) 2,6-DNT, (h) NP, (i) DNB, (j) NB.

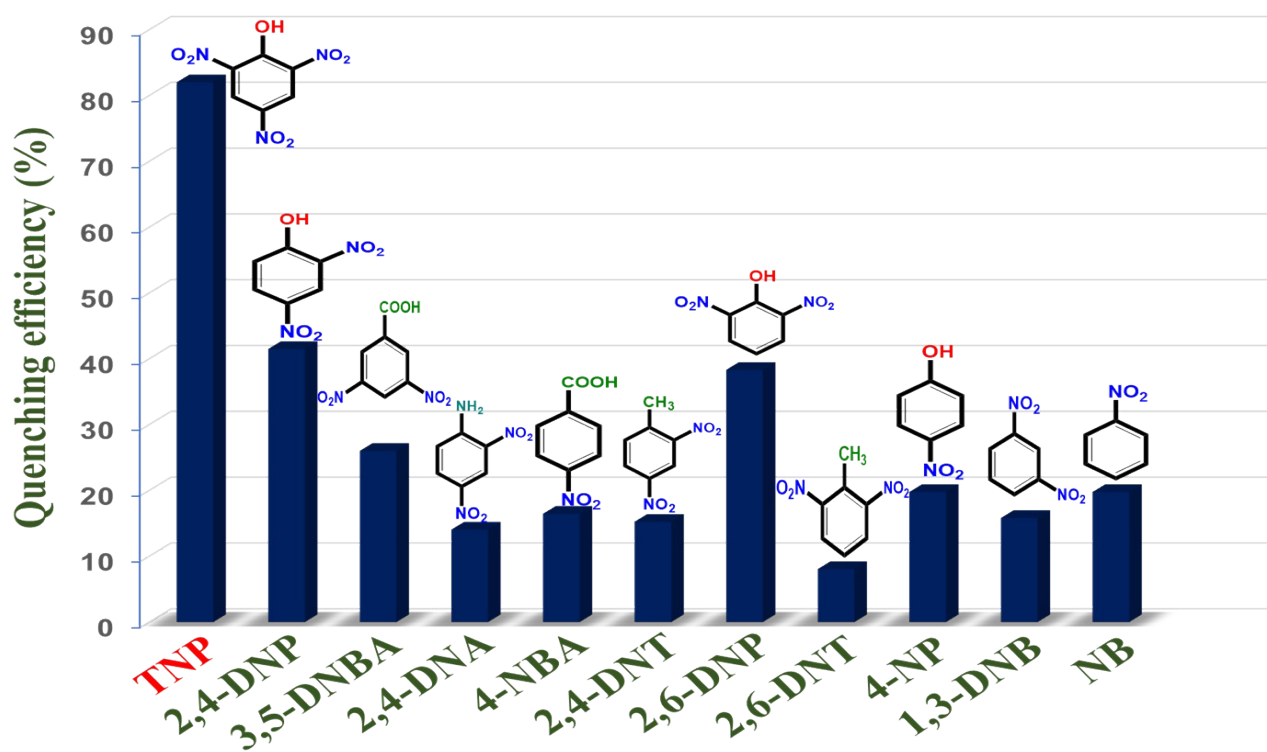

**Fig. S28** Bar chart showing the comparative quenching efficiency (QE) of the NAC series towards the luminescence profile of **1**

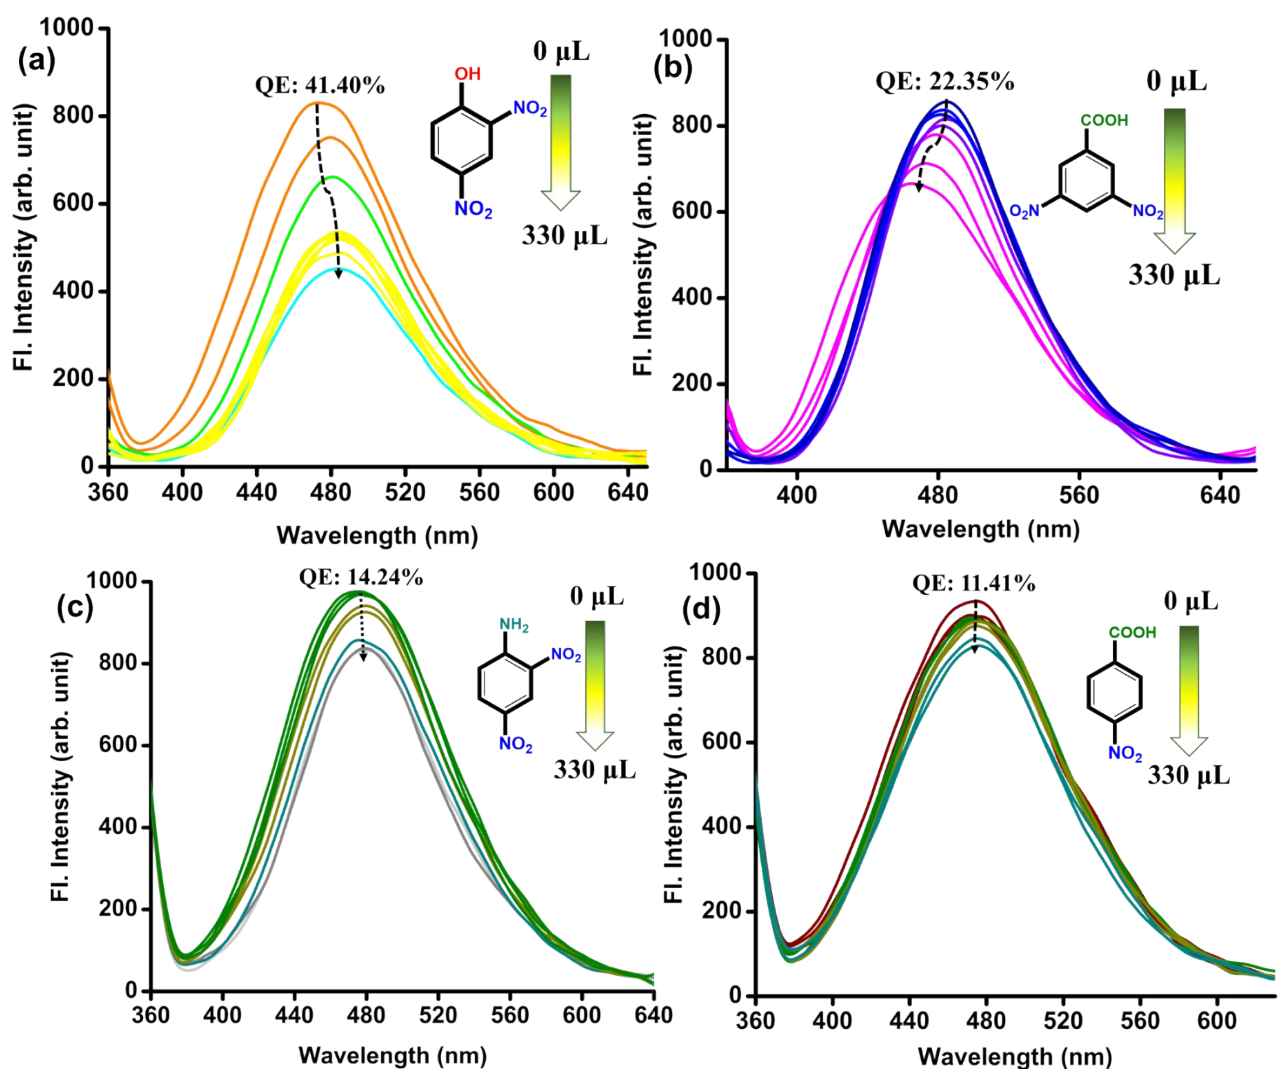

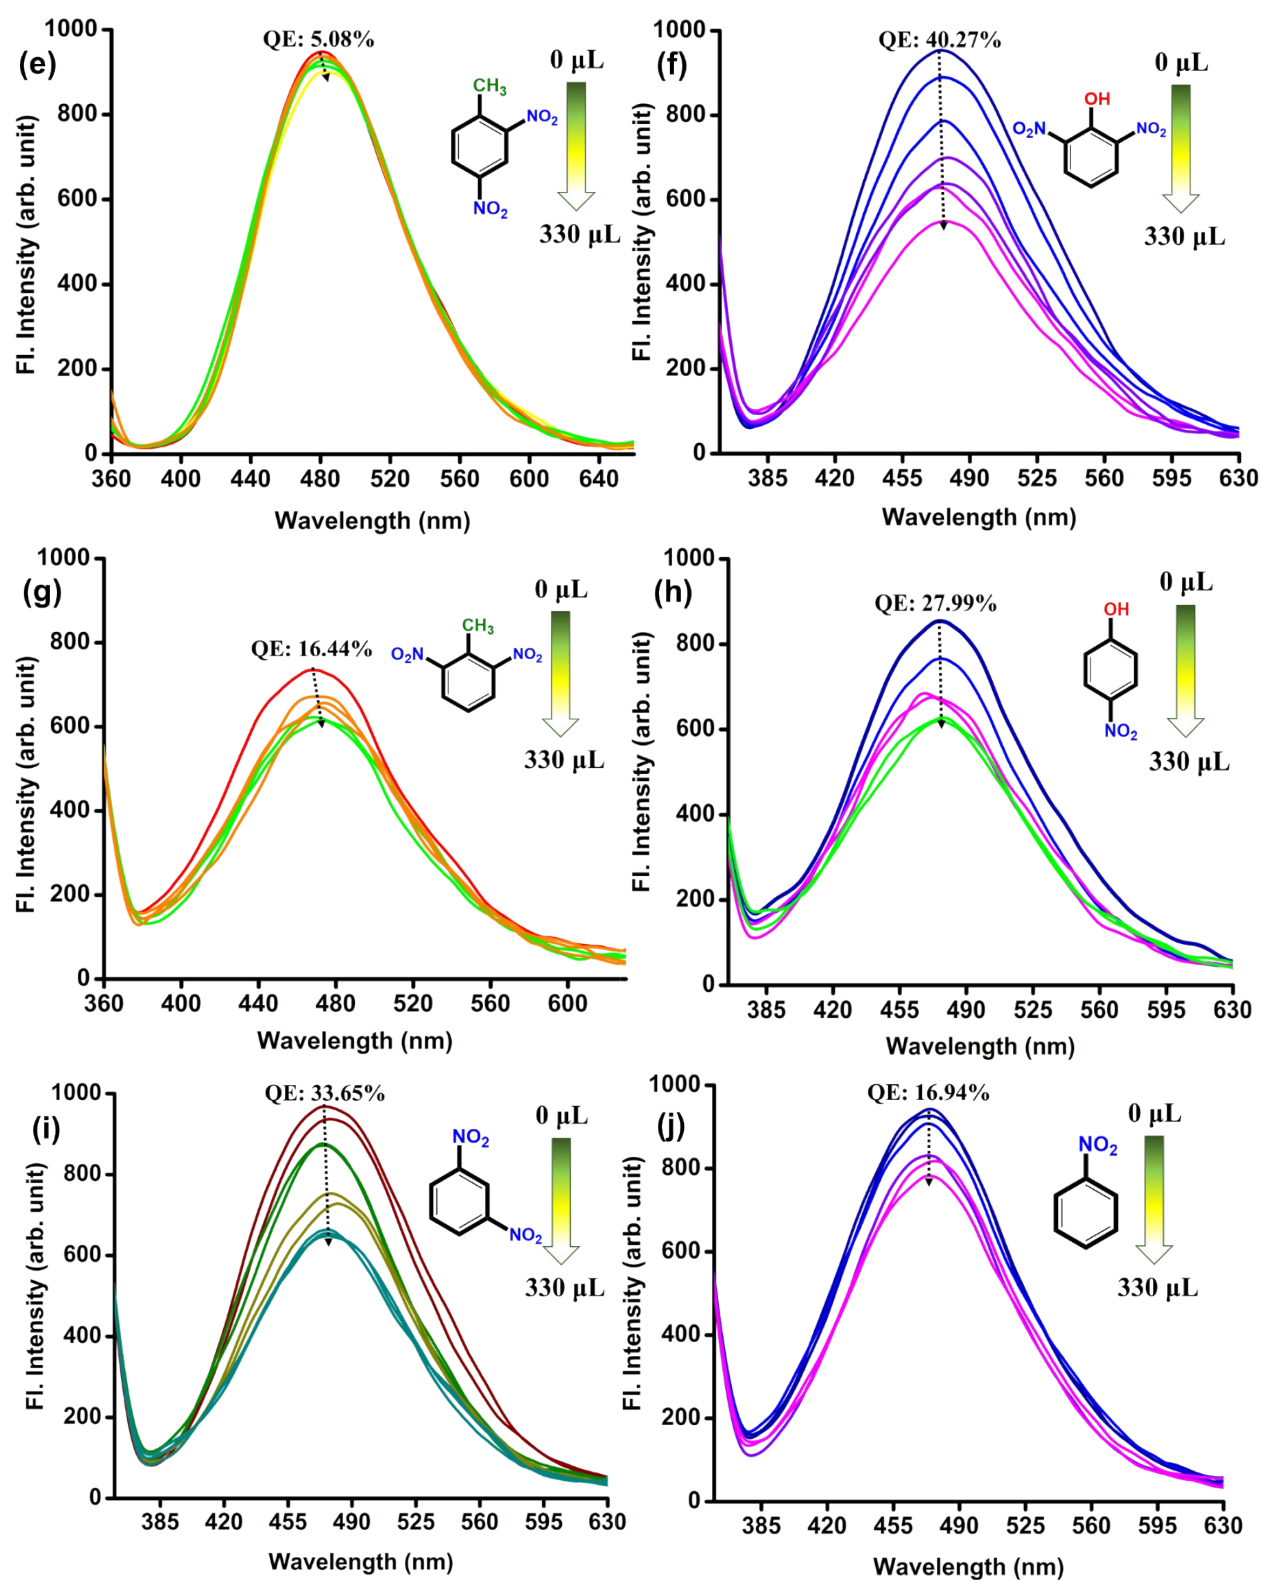

**Fig. S29** Emission profile of CP 2-acetonitrile dispersion upon gradual addition of  $10^{-4}$  M aq. solution of other nitro-analytes: (a) 2,4-DNP, (b) DNBA, (c) DNA, (d) NBA, (e) 2,4-DNT, (f) 2,6-DNP, (g) 2,6-DNT, (h) NP, (i) DNB, (j) NB

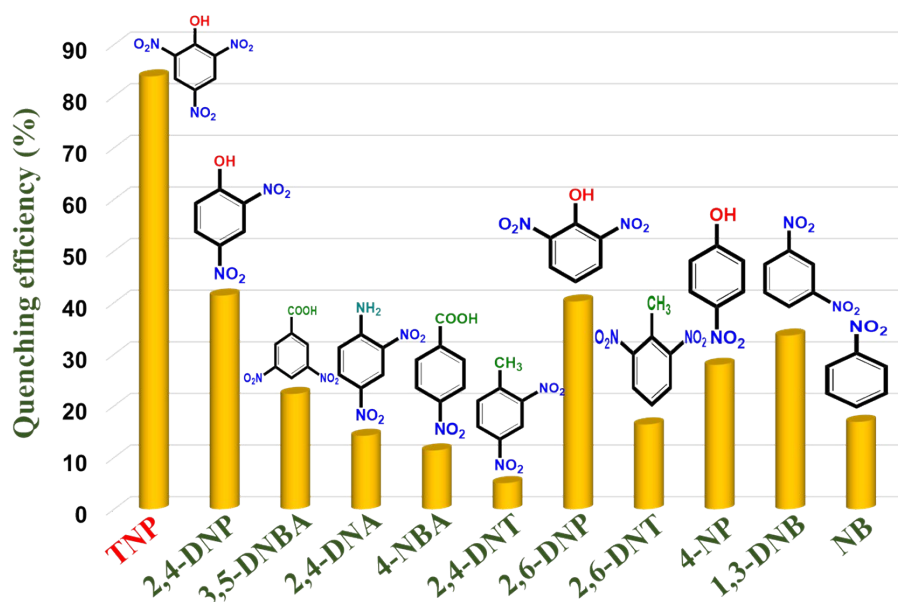

**Fig. S30** Bar chart showing the comparative quenching efficiency ( $QE$ ) of the NAC series towards the luminescence profile of **2**.

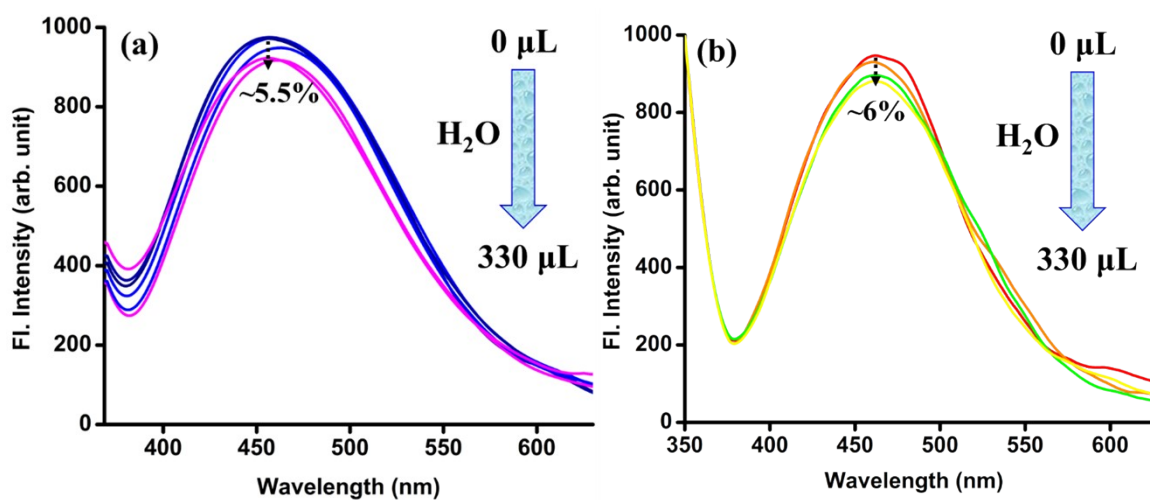

**Fig. S31** Effect of addition of water (detection medium) on the emission profile of **1** and **2**

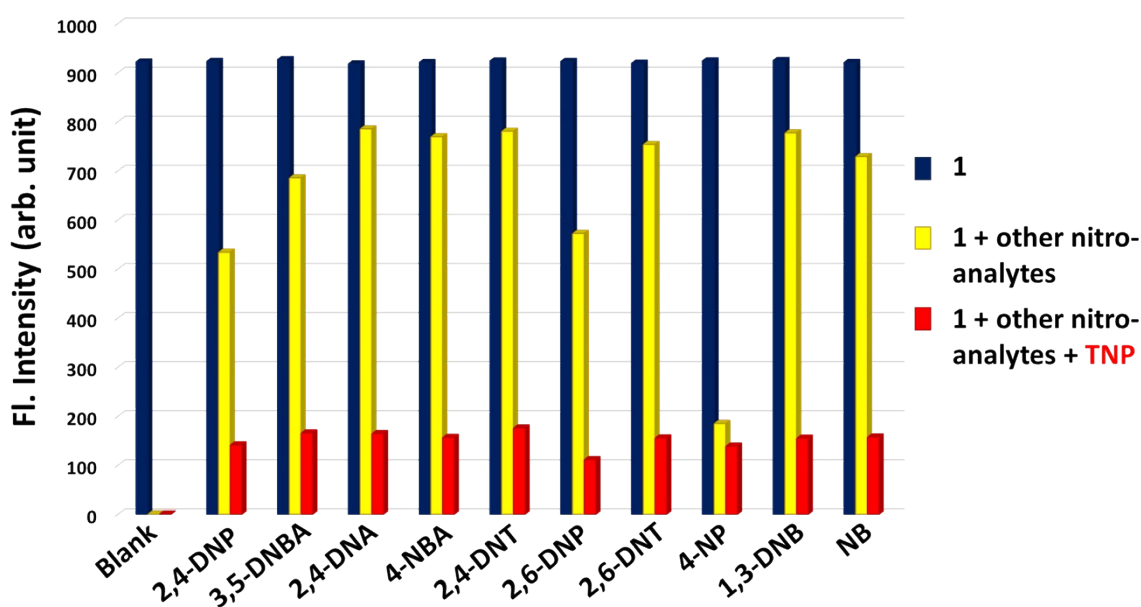

**Fig. S32** Detection in a competitive environment: Competitive Analyte Test (CAT) for CP **1**, depicting high selectivity of the probe towards TNP.

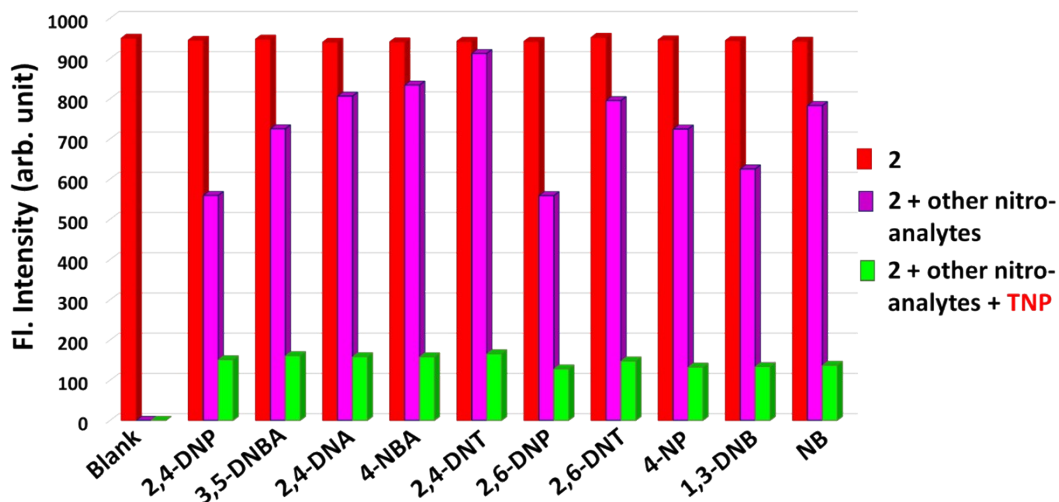

Fig. S33 Competitive analyte test (CAT) for CP 2, affirming exclusive selectivity towards TNP.

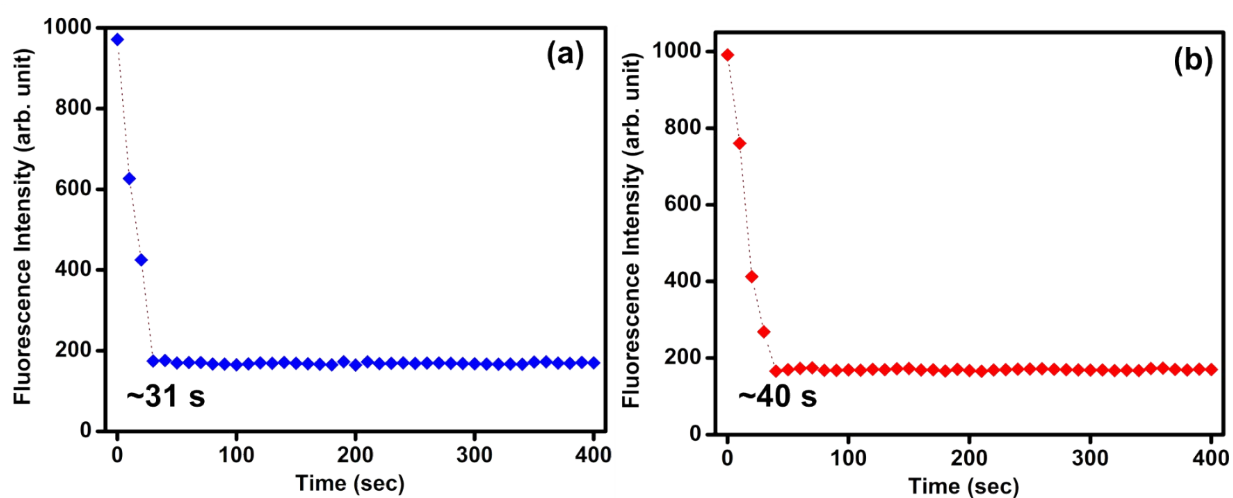

Fig. S34 Fast Responsive Analyte (FRA) test: estimation of response time of analyte interaction to the sensors: 1 (a) and 2 (b).

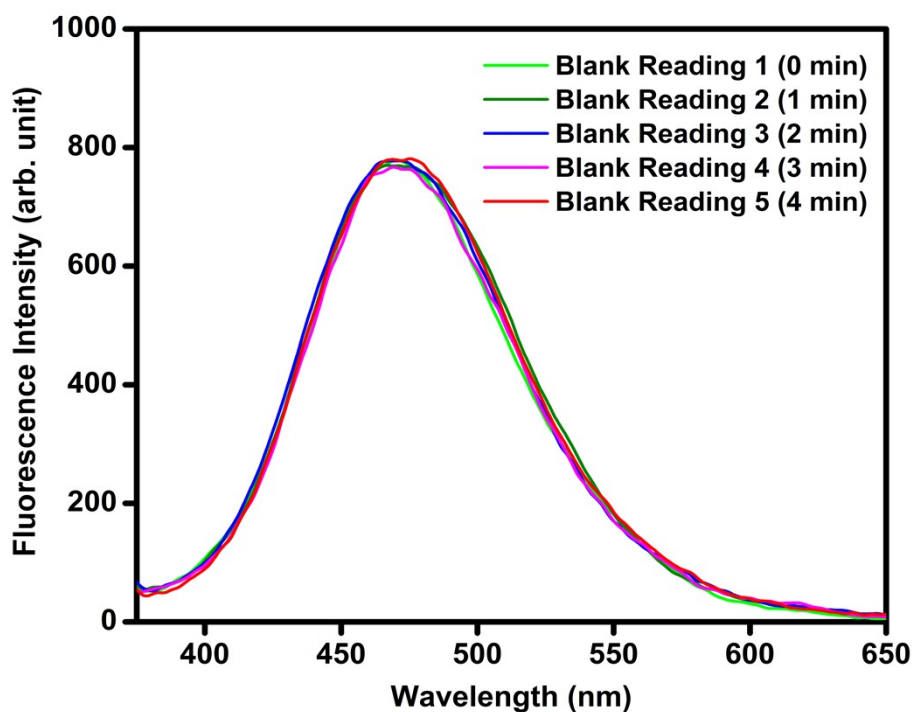

Fig. S35 Five consecutive Blank measurements of 1/acetonitrile dispersion recorded at a regular interval of ~1 min.

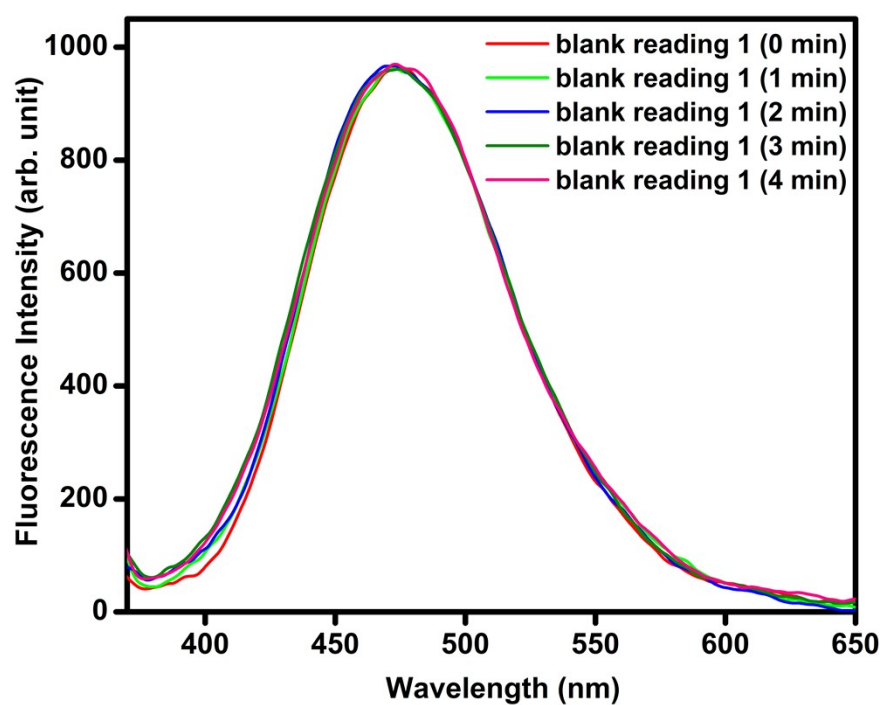

**Fig. S36** Five consecutive Blank measurements of 2/acetonitrile dispersion recorded at a regular interval of ~1 min.

**Table S1** Calculation of Standard Deviation ( $\sigma$ ):

| CP 1                                |                               |
|-------------------------------------|-------------------------------|
| Blank Reading                       | Fluorescence Intensity (a.u.) |
| 1                                   | 780.197                       |
| 2                                   | 778.486                       |
| 3                                   | 776.775                       |
| 4                                   | 769.075                       |
| 5                                   | 766.509                       |
| <b>Value of <math>\sigma</math></b> | <b>6.049</b>                  |
| CP 2                                |                               |
| Blank Reading                       | Fluorescence Intensity (a.u.) |
| 1                                   | 970.024                       |
| 2                                   | 966.654                       |
| 3                                   | 962.895                       |
| 4                                   | 962.247                       |
| 5                                   | 960.822                       |
| <b>Value of <math>\sigma</math></b> | <b>3.752</b>                  |

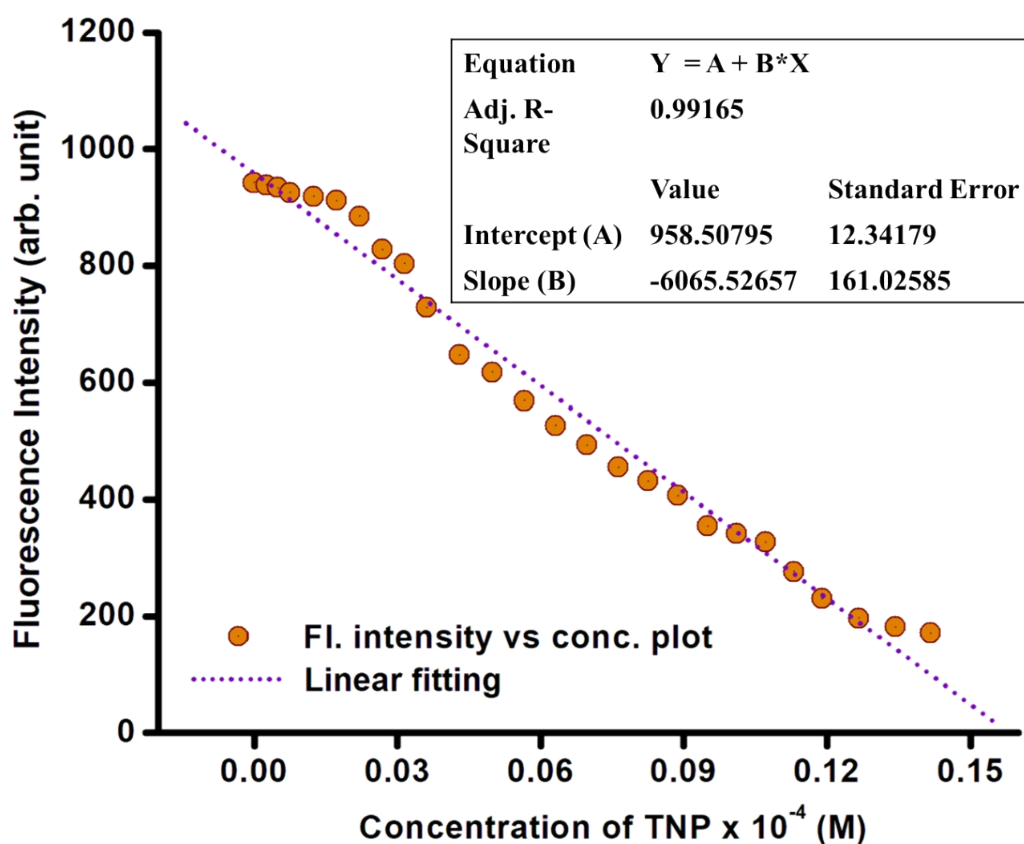

**Fig. S37** Alteration in the PL intensity of **1** with increasing TNP concentration and corresponding linear fitting for evaluation of slope ( $k$ ) used in  $3\sigma/k$  equation.

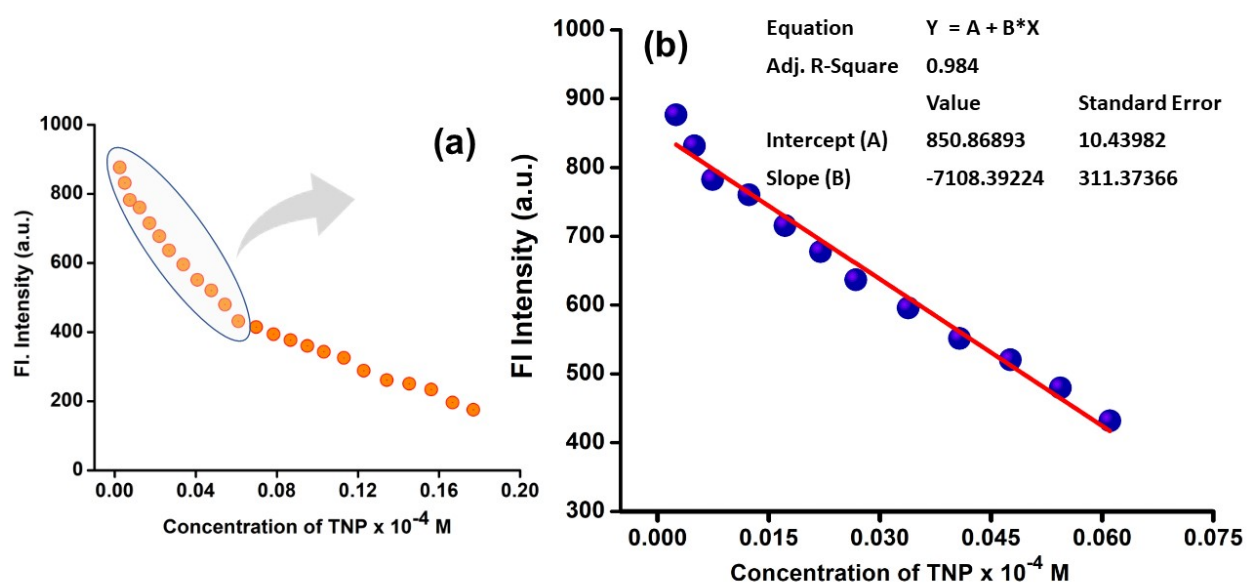

**Fig. S38.** (a) Alteration in the PL intensity of **2** with increasing TNP concentration: full range; (b) linear range of (a) for evaluation of slope ( $k$ ) used in  $3\sigma/k$  equation.

**Table S2** Calculation of limit of detection ( $LOD$ )

1. For CP 1

Std. deviation ( $\sigma$ ) = 6.049

Slope ( $k$ ) = 6065.526

Therefore,  $LOD (3\sigma/k) = 0.0029$  for  $10^{-4}$  M [TNP] *i.e.*,  $\sim 0.29 \mu\text{M}$  for TNP.

2. For CP 2

Std. deviation ( $\sigma$ ) = 3.752

Slope ( $k$ ) = 7108.392

Therefore,  $LOD (3\sigma/k) = 0.0015$  for  $10^{-4}$  M [TNP] *i.e.*,  $\sim 0.15 \mu\text{M}$  for TNP.



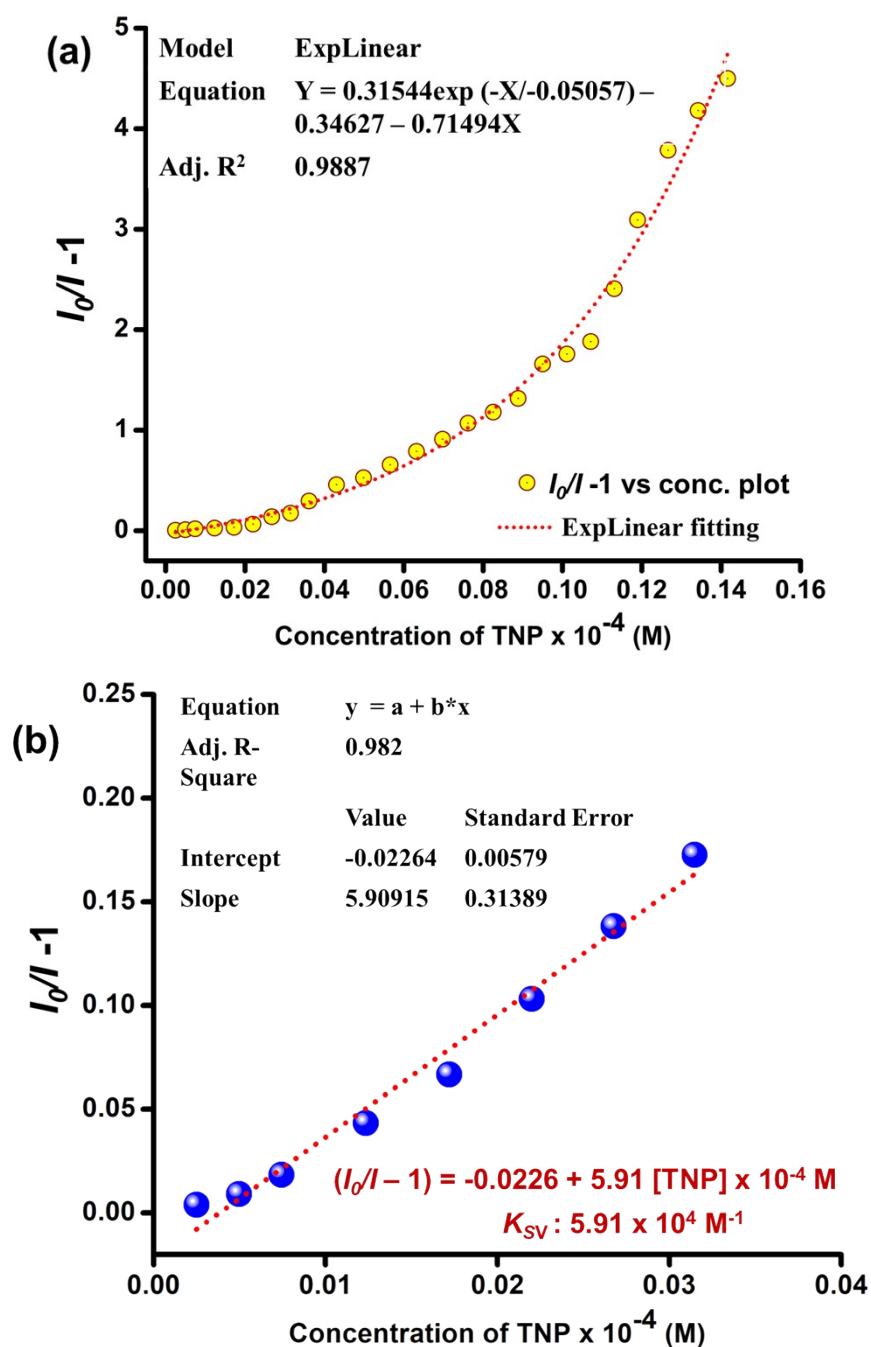

**Fig. S39 (a)** Full range of the Stern-Volmer (S-V) plot [ $I_0/I - 1$  vs Concentration] of compound **1** with varying equivalent concentration of TNP along with its non-linear fitting; **(b)** linear range of the plot for calculation of quenching constant ( $K_{SV}$ ).

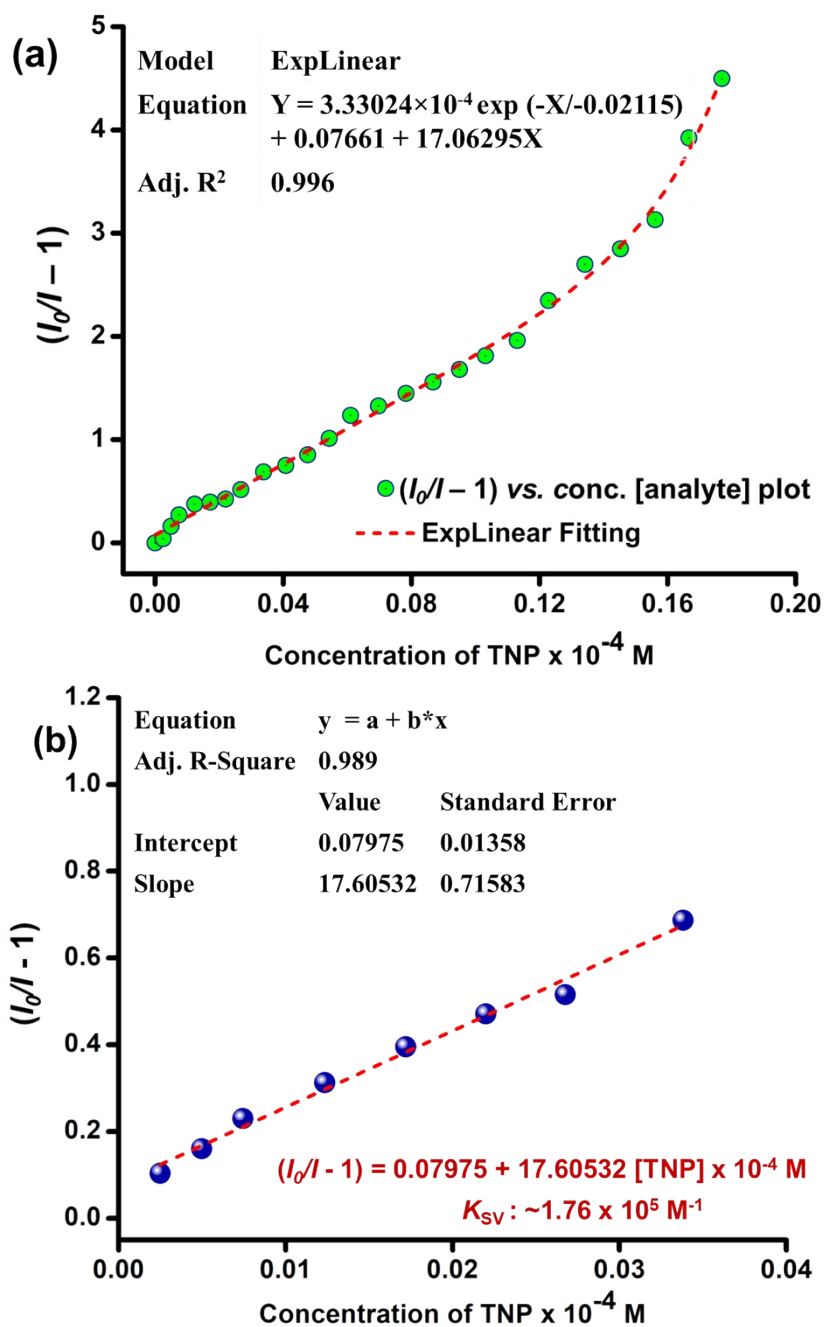

**Fig. S40** (a) Full range of the Stern-Volmer (S-V) plot [ $I_0/I - 1$  vs Concentration] of compound **2** with varying equivalent concentration of TNP along with its non-linear fitting; (b) linear range of the plot for calculation of quenching constant ( $K_{SV}$ ).

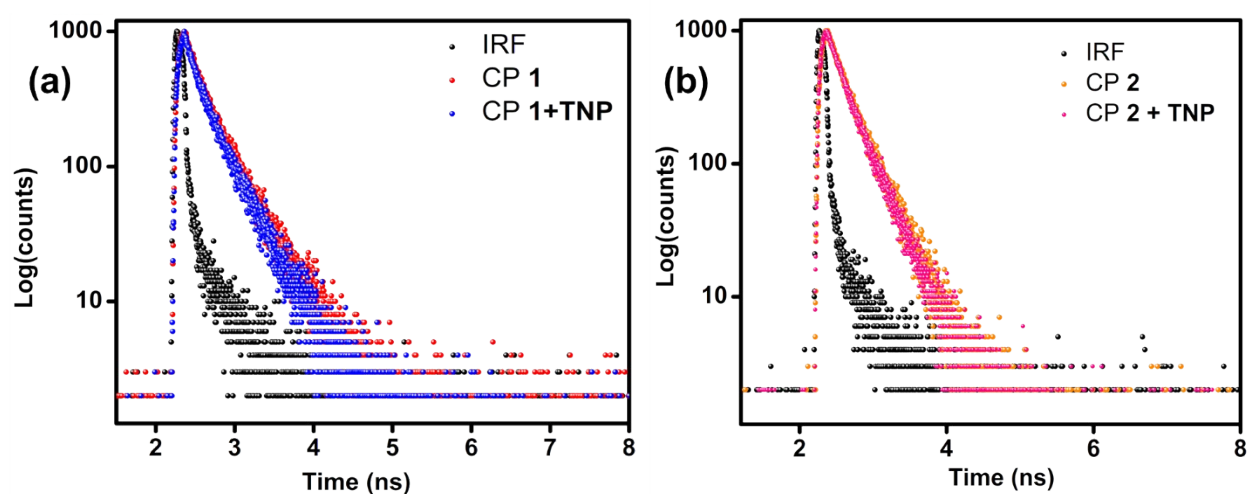

**Fig. S41** Lifetime decay profile of **1** and **2** upon interaction with analyte TNP

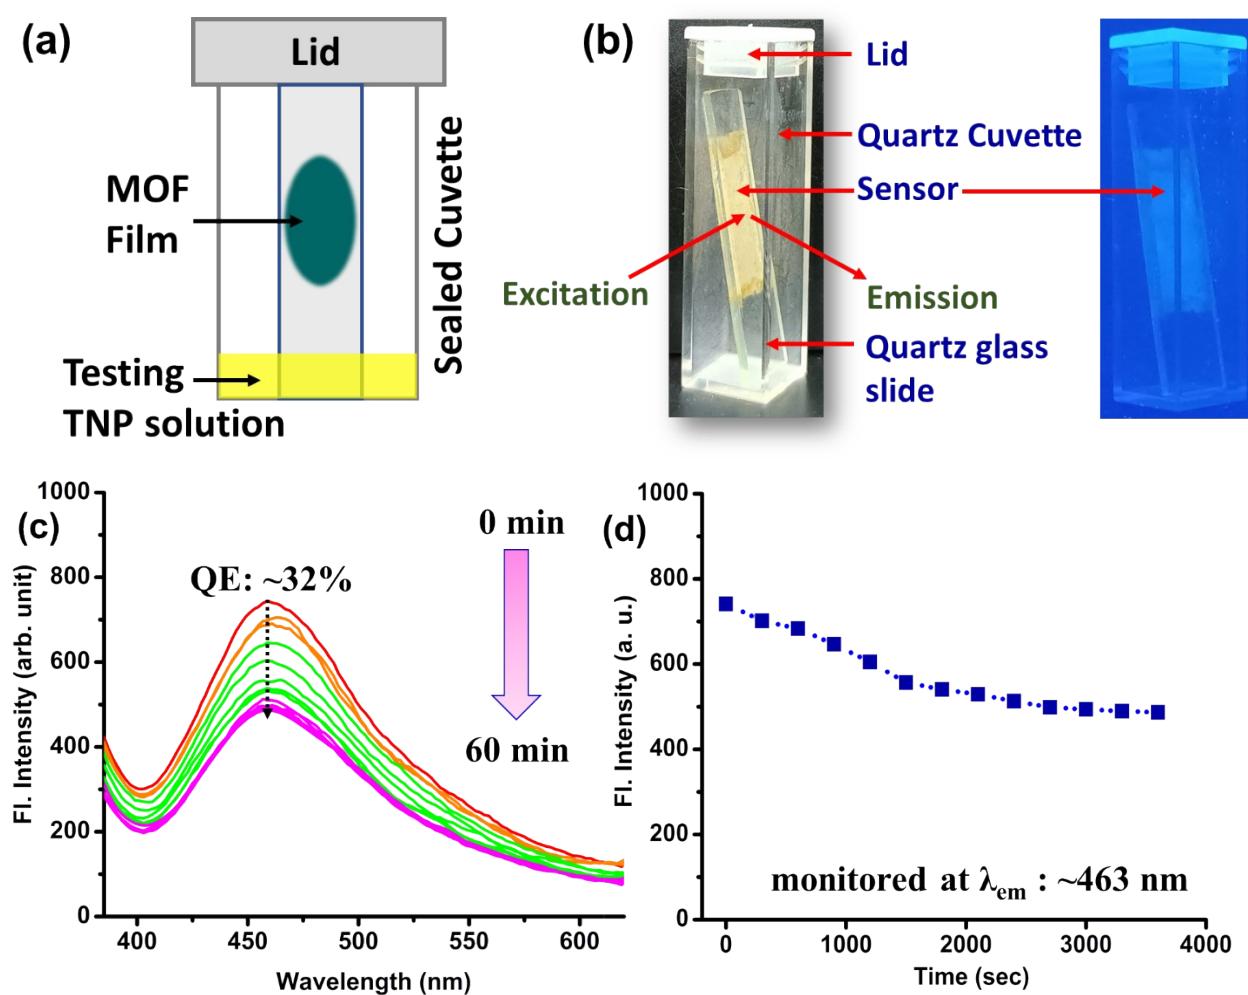

**Fig. S42** (a) schematic representation and (b) physical image of the experimental set-up (under normal light and in UV-chamber) adapted for acetonitrile-mediated TNP vapour sensing study; (c) Fluorescence quenching ( $\sim 32\%$ ) of **1** drop-casted on a quartz slide upon exposure of TNP (acetonitrile) vapour (up to  $\sim 60$  minutes); (d) alteration of Fl. intensity as a function of elapsed time (monitored at  $\sim 463$  nm).

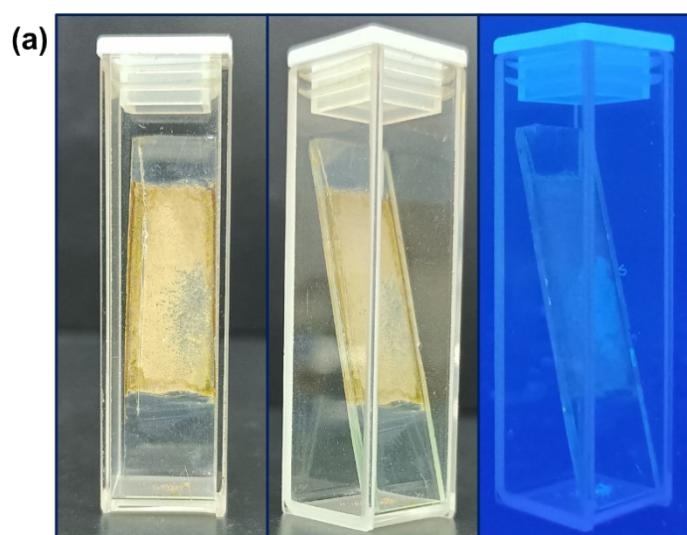

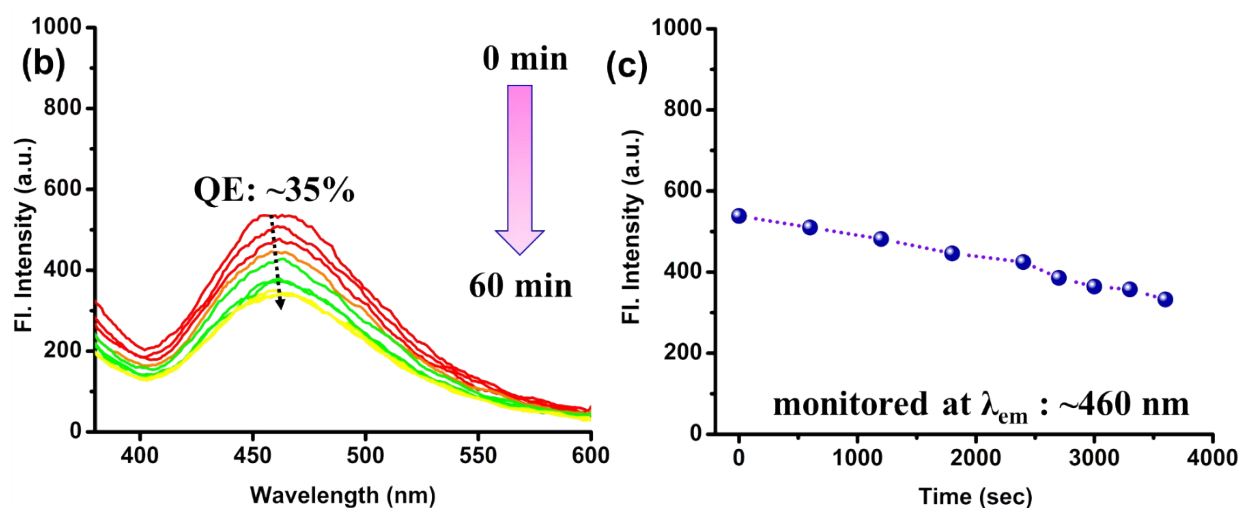

**Fig. S43** (a) CP 2 drop-casted on a quartz slide for executing acetonitrile-mediated TNP vapour sensing study [left to right: front and perspective view under normal light and UV-torch]; (b) Fluorescence quenching ( $\sim 35\%$ ) of CP 2 upon exposure of TNP (acetonitrile) vapour (up to  $\sim 60$  minutes); (d) alteration of Fl. intensity as a function of elapsed time (monitored at  $\sim 460$  nm).

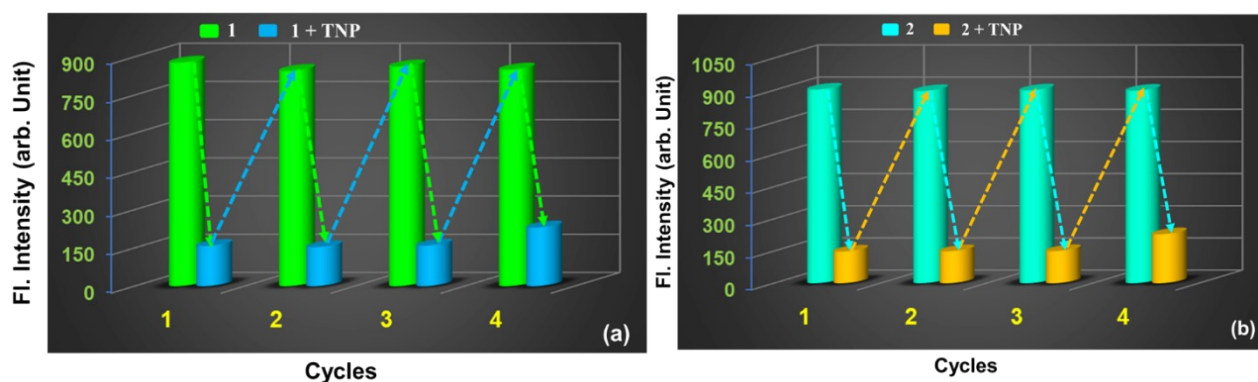

**Fig. S44** Three times recyclable behaviour of the sensors 1 (a) and 2 (b) towards TNP sensing

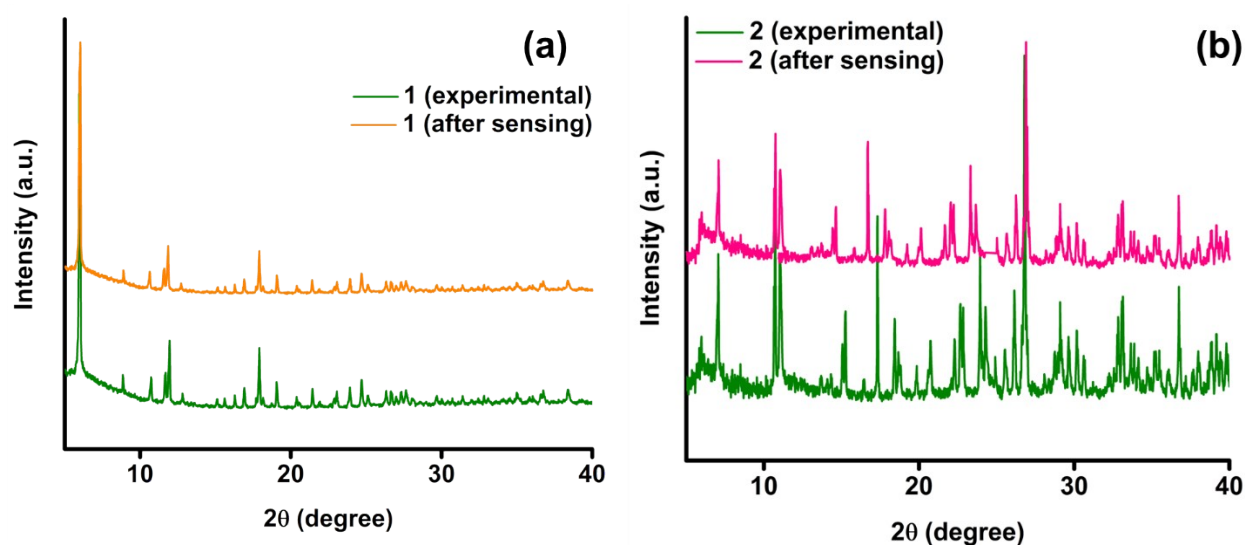

**Fig. S45** Powder XRD pattern of 1 and 2, before and after TNP sensing experiments; affirming no structural breakdown.

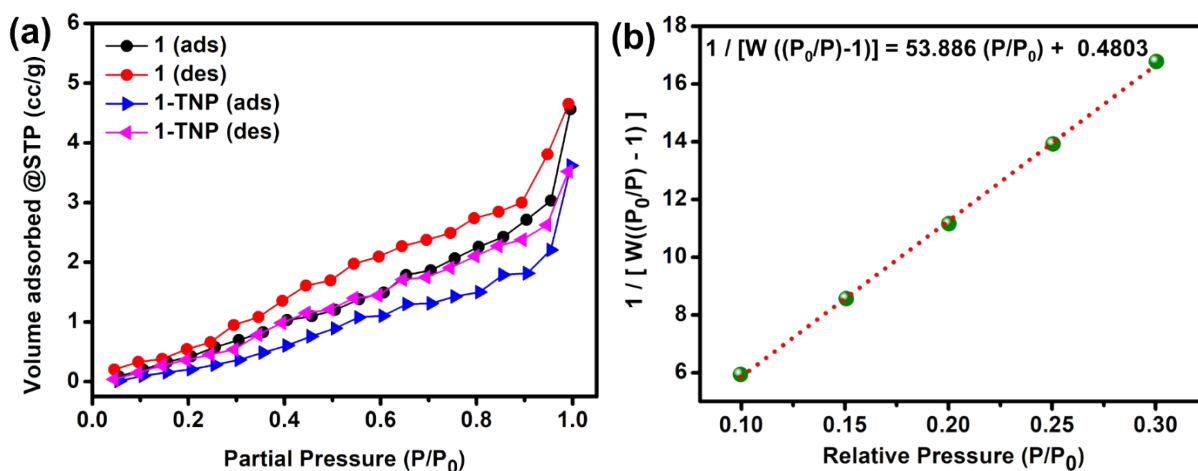

**Fig. S46.** (a)  $N_2$  adsorption-desorption isotherm of **1** before and after TNP sensing study, (b) linear fitting of BET equation at low  $P/P_0$  range for the isotherm obtained for **1**, depicting a surface area of  $11.07 \text{ m}^2/\text{g}$ .

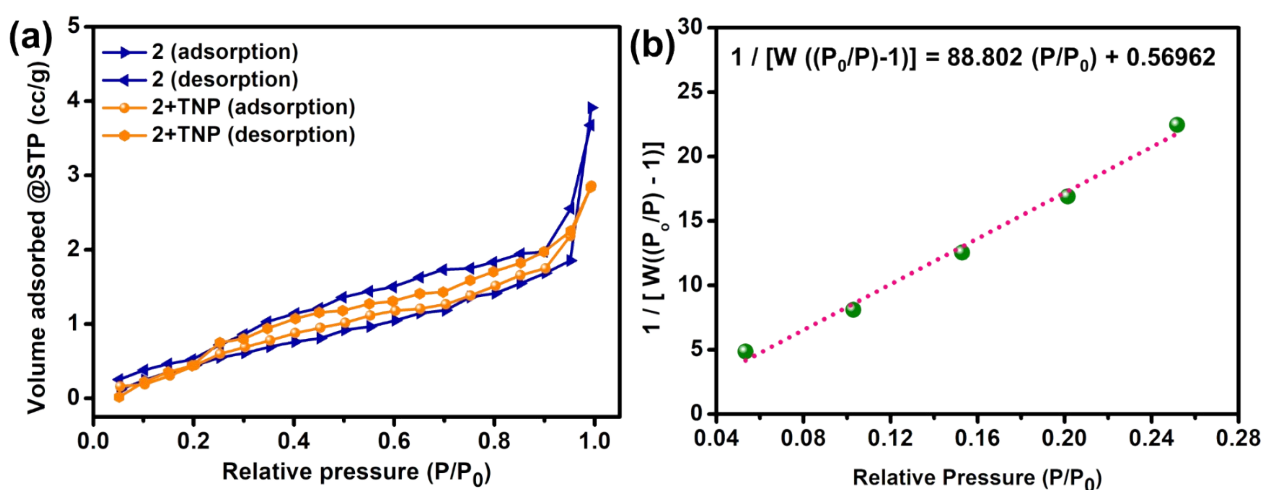

**Fig. S47.** (a)  $N_2$  adsorption-desorption isotherm of **2** before and after TNP sensing study, (b) linear fitting of BET equation at low  $P/P_0$  range for the isotherm obtained for **2**, depicting a surface area of  $8.62 \text{ m}^2/\text{g}$ .

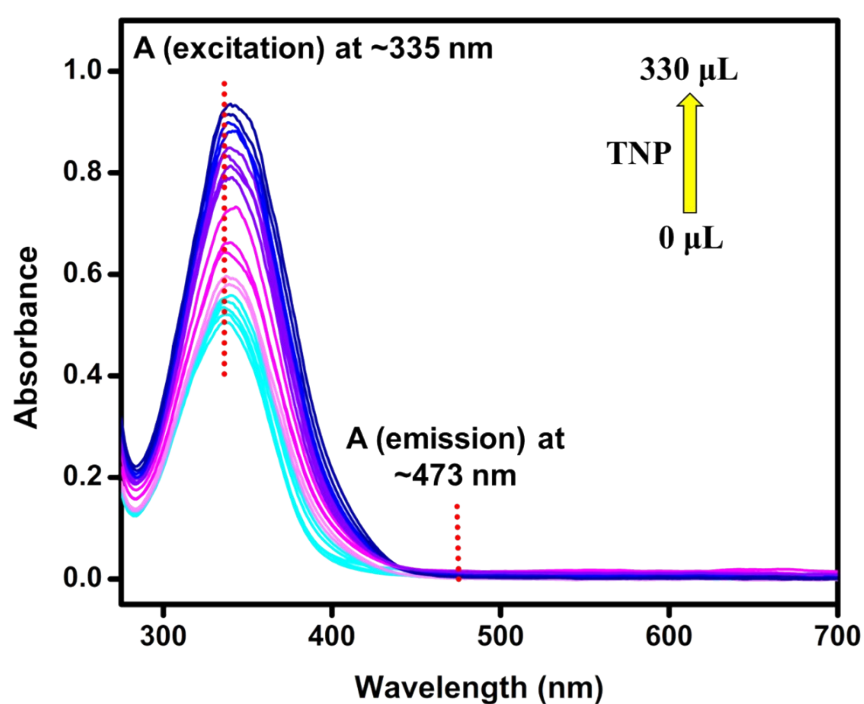

**Fig. S48.** Absorption spectra of **1** during gradual addition of TNP ( $10^{-4} \text{ M}$ , in  $H_2O$ ) for calculation of Inner Filter Effect (IFE) contribution.

**Table S3** Calculation of IFE% of analyte (TNP) on the fluorescence profile of CP 1/acetonitrile dispersion

| Sl. No. | Analyte added ( $\mu\text{L}$ ) | $A_{\text{ex}}$ | $A_{\text{em}}$ | $I_{\text{obs}}$ | $I_{\text{corr}}$ | $I_{\text{corr}}/I_{\text{obs}}$<br>(correction factor, CF) | $OE_{\text{obs}}$<br>(%) | $OE_{\text{corr}}$<br>(%) |
|---------|---------------------------------|-----------------|-----------------|------------------|-------------------|-------------------------------------------------------------|--------------------------|---------------------------|
| 1.      | 0                               | 0.5041          | 0.0009          | 940.02           | 1681.27           | 1.789                                                       | 0                        | 0                         |
| 2.      | 10                              | 0.5191          | 0.0019          | 884.84           | 1611.99           | 1.822                                                       | 5.8700                   | 4.120                     |
| 3.      | 10                              | 0.5342          | 0.0023          | 823.65           | 1527.54           | 1.855                                                       | 12.379                   | 9.144                     |
| 4.      | 10                              | 0.5442          | 0.0026          | 725.06           | 1360.74           | 1.877                                                       | 22.868                   | 19.065                    |
| 5.      | 10                              | 0.5518          | 0.0029          | 646.87           | 1225.09           | 1.894                                                       | 31.186                   | 27.133                    |
| 6.      | 15                              | 0.5693          | 0.0032          | 612.87           | 1184.73           | 1.933                                                       | 34.802                   | 29.534                    |
| 7.      | 15                              | 0.5919          | 0.0041          | 568.68           | 1129.45           | 1.986                                                       | 39.503                   | 32.821                    |
| 8.      | 15                              | 0.6421          | 0.0047          | 524.48           | 1104.41           | 2.106                                                       | 44.205                   | 34.311                    |
| 9.      | 20                              | 0.6547          | 0.0057          | 490.48           | 1049.12           | 2.139                                                       | 47.822                   | 37.600                    |
| 10.     | 20                              | 0.7099          | 0.0061          | 456.49           | 1040.95           | 2.280                                                       | 51.438                   | 38.085                    |
| 11.     | 25                              | 0.7827          | 0.0072          | 429.29           | 1065.86           | 2.483                                                       | 54.331                   | 36.604                    |
| 12.     | 25                              | 0.7952          | 0.0078          | 391.91           | 987.84            | 2.521                                                       | 58.308                   | 41.244                    |
| 13.     | 25                              | 0.8278          | 0.0086          | 357.89           | 937.45            | 2.619                                                       | 61.927                   | 44.241                    |
| 14.     | 25                              | 0.8354          | 0.0127          | 327.30           | 868.95            | 2.655                                                       | 65.182                   | 48.316                    |
| 15.     | 25                              | 0.8605          | 0.01384         | 279.71           | 765.38            | 2.736                                                       | 70.244                   | 54.476                    |
| 16.     | 25                              | 0.8831          | 0.0144          | 232.11           | 652.29            | 2.810                                                       | 75.308                   | 61.202                    |
| 17.     | 25                              | 0.9081          | 0.0152          | 198.12           | 573.56            | 2.895                                                       | 78.924                   | 65.885                    |
| 18.     | 30                              | 0.9207          | 0.0159          | 174.32           | 512.45            | 2.939                                                       | 82.094                   | 70.569                    |

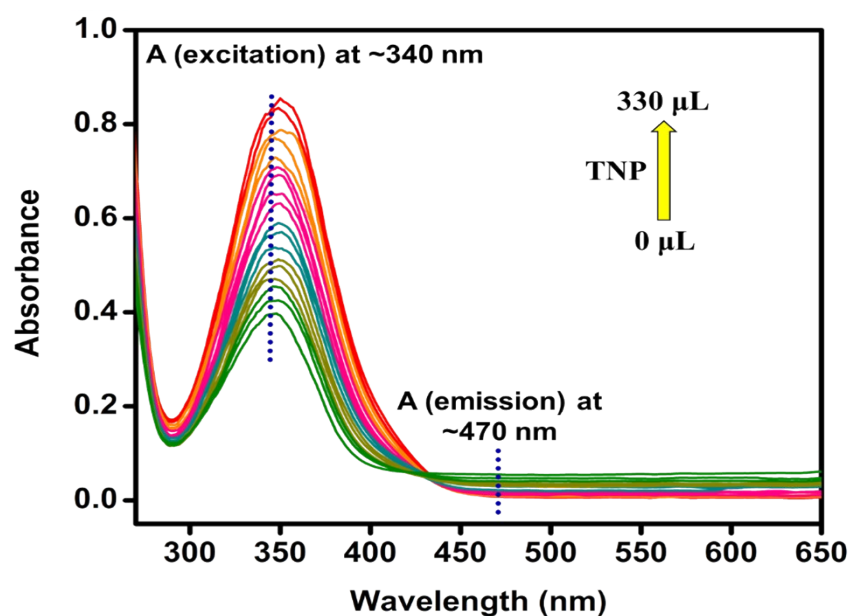

**Fig. S49** Absorption spectra of **2** during gradual addition of TNP ( $10^{-4}$  M, in  $\text{H}_2\text{O}$ ) for calculation of IFE contribution.

**Table S4** Contribution of IFE% of analyte (TNP) on the fluorescence profile of CP **2**/acetonitrile dispersion

| Sl. No. | Analyte added ( $\mu\text{L}$ ) | $A_{\text{ex}}$ | $A_{\text{em}}$ | $I_{\text{obs}}$ | $I_{\text{corr}}$ | $I_{\text{corr}}/I_{\text{obs}}$<br>(correction factor, CF) | $OE_{\text{obs}}$<br>(%) | $OE_{\text{corr}}$<br>(%) |
|---------|---------------------------------|-----------------|-----------------|------------------|-------------------|-------------------------------------------------------------|--------------------------|---------------------------|
| 1.      | 0                               | 0.3855          | 0.0548          | 964.49           | 1601.208          | 1.660                                                       | 0                        | 0                         |
| 2.      | 10                              | 0.4144          | 0.0467          | 921.88           | 1567.561          | 1.700                                                       | 4.418                    | 2.101                     |
| 3.      | 10                              | 0.4354          | 0.0411          | 829.55           | 1435.795          | 1.731                                                       | 13.991                   | 10.330                    |
| 4.      | 10                              | 0.4633          | 0.0362          | 754.98           | 1341.793          | 1.777                                                       | 21.722                   | 16.201                    |
| 5.      | 10                              | 0.4748          | 0.0338          | 683.97           | 1228.392          | 1.796                                                       | 29.085                   | 23.283                    |
| 6.      | 15                              | 0.4959          | 0.0318          | 637.8            | 1170.940          | 1.836                                                       | 33.872                   | 26.871                    |
| 7.      | 15                              | 0.5221          | 0.0299          | 570.34           | 1076.797          | 1.888                                                       | 40.866                   | 32.751                    |
| 8.      | 15                              | 0.5432          | 0.022           | 541.93           | 1038.827          | 1.917                                                       | 43.812                   | 35.122                    |
| 9.      | 20                              | 0.5616          | 0.0196          | 520.62           | 1016.532          | 1.953                                                       | 46.021                   | 36.515                    |
| 10.     | 20                              | 0.5905          | 0.0182          | 481.56           | 970.511           | 2.015                                                       | 50.071                   | 39.389                    |
| 11.     | 25                              | 0.6168          | 0.0162          | 424.75           | 880.305           | 2.073                                                       | 55.961                   | 45.022                    |
| 12.     | 25                              | 0.6457          | 0.0128          | 392.78           | 838.300           | 2.134                                                       | 59.276                   | 47.646                    |
| 13.     | 25                              | 0.6746          | 0.0119          | 360.83           | 795.340           | 2.204                                                       | 62.589                   | 50.329                    |
| 14.     | 25                              | 0.6983          | 0.01            | 325.32           | 735.294           | 2.260                                                       | 66.270                   | 54.079                    |
| 15.     | 25                              | 0.7298          | 0.0096          | 289.81           | 678.911           | 2.343                                                       | 69.952                   | 57.600                    |
| 16.     | 25                              | 0.7535          | 0.0092          | 251.4            | 604.944           | 2.406                                                       | 73.934                   | 62.220                    |
| 17.     | 25                              | 0.7876          | 0.0083          | 208.2            | 520.512           | 2.500                                                       | 78.413                   | 67.493                    |
| 18.     | 30                              | 0.8087          | 0.0077          | 156.06           | 399.477           | 2.560                                                       | 83.819                   | 75.051                    |

**Table S5** HOMO, LUMO energies, orbital images of the NACs, CPs (**1** and **2**), its fluorophoric unit (HL), Sensor (1/2)•••analyte(TNP) adducts [from DFT calculations (B3LYP-level), performed using Turbomole (v7.0) software]. (Colour codes: Sea Green – C, Black – Cd, Red – O, Blue – N, White – H, Bright Yellow – S)

| Entry | LUMO (eV)                                                                                                                    | HOMO (eV)                                                                                                                     | $\Delta E$ & Total Energy                 |
|-------|------------------------------------------------------------------------------------------------------------------------------|-------------------------------------------------------------------------------------------------------------------------------|-------------------------------------------|
| HL    | 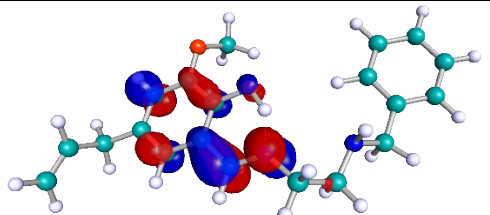<br>$E_{\text{LUMO}} = -1.412 \text{ eV}$ | <br>$E_{\text{HOMO}} = -5.807 \text{ eV}$ | 4.396 eV,<br>T.E.: -<br>1035.05<br>KJ/mol |

|         |                                                                                                                                       |                                                                                                                                        |                                                      |
|---------|---------------------------------------------------------------------------------------------------------------------------------------|----------------------------------------------------------------------------------------------------------------------------------------|------------------------------------------------------|
| 1       | 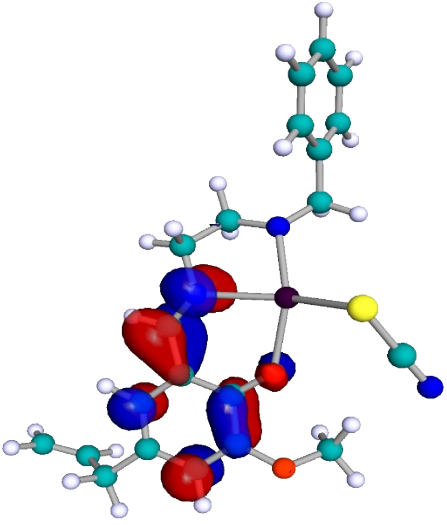 <p><math>E_{LUMO} = - 1.012 \text{ eV}</math></p>   |  <p><math>E_{HOMO} = - 4.552 \text{ eV}</math></p>   | <p>3.535 eV,<br/>T.E.: -<br/>1692.49<br/>KJ/mol</p>  |
| 2       |  <p><math>E_{LUMO} = - 3.21 \text{ eV}</math></p>   |  <p><math>E_{HOMO} = -5.445 \text{ eV}</math></p>   | <p>1.935 eV,<br/>T.E.: -<br/>1441.721<br/>KJ/mol</p> |
| TNP     |  <p><math>E_{LUMO} = - 3.374 \text{ eV}</math></p> |  <p><math>E_{HOMO} = - 7.728 \text{ eV}</math></p> | <p>4.354 eV,<br/>T.E.: -<br/>919.85<br/>KJ/mol</p>   |
| 2,4-DNP |  <p><math>E_{LUMO} = -3.015 \text{ eV}</math></p>  |  <p><math>E_{HOMO} = - 7.26 \text{ eV}</math></p>  | <p>4.245 eV,<br/>T.E.:<br/>-715.60<br/>KJ/mol</p>    |



|                       |                                                                                                                                      |                                                                                                                                       |                                                    |
|-----------------------|--------------------------------------------------------------------------------------------------------------------------------------|---------------------------------------------------------------------------------------------------------------------------------------|----------------------------------------------------|
| <p><b>2,4-DNT</b></p> | 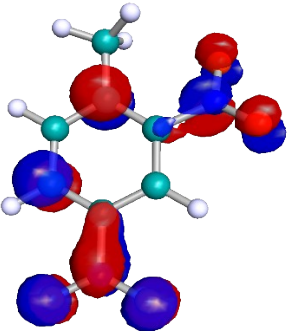 <p><math>E_{LUMO} = -2.828 \text{ eV}</math></p>   |  <p><math>E_{HOMO} = -7.763 \text{ eV}</math></p>   | <p>4.936 eV,<br/>T.E.: -<br/>679.71<br/>KJ/mol</p> |
| <p><b>2,6-DNT</b></p> |  <p><math>E_{LUMO} = -2.712 \text{ eV}</math></p>   |  <p><math>E_{HOMO} = -7.636 \text{ eV}</math></p>   | <p>4.921 eV,<br/>T.E.: -<br/>679.70<br/>KJ/mol</p> |
| <p><b>4-NP</b></p>    |  <p><math>E_{LUMO} = -2.395 \text{ eV}</math></p> |  <p><math>E_{HOMO} = -6.762 \text{ eV}</math></p> | <p>4.365 eV,<br/>T.E.: -<br/>511.33<br/>KJ/mol</p> |
| <p><b>1,3-DNB</b></p> |  <p><math>E_{LUMO} = -2.933 \text{ eV}</math></p> |  <p><math>E_{HOMO} = -8.014 \text{ eV}</math></p> | <p>5.080 eV,<br/>T.E.: -<br/>640.46<br/>KJ/mol</p> |
| <p><b>2,4-DNA</b></p> |                                                   |                                                   | <p>3.835 eV,<br/>T.E.: -<br/>695.76<br/>KJ/mol</p> |

|                 | $E_{LUMO} = -2.678 \text{ eV}$                                                                                        | $E_{HOMO} = -6.514 \text{ eV}$                                                                                         |                                           |
|-----------------|-----------------------------------------------------------------------------------------------------------------------|------------------------------------------------------------------------------------------------------------------------|-------------------------------------------|
| <b>2,6-DNP</b>  | 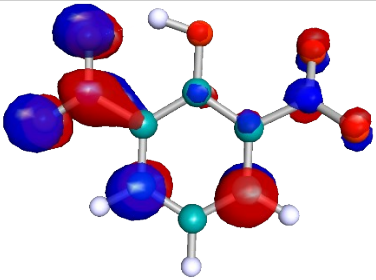<br>$E_{LUMO} = -3.091 \text{ eV}$   | <br>$E_{HOMO} = -7.197 \text{ eV}$   | 4.107 eV,<br>T.E.: -<br>715.59<br>KJ/mol  |
| <b>4-NBA</b>    | <br>$E_{LUMO} = -2.903 \text{ eV}$  | <br>$E_{HOMO} = -7.663 \text{ eV}$  | 4.759 eV,<br>T.E.: -<br>624.55<br>KJ/mol  |
| <b>3,5-DNBA</b> | <br>$E_{LUMO} = -3.059 \text{ eV}$ | <br>$E_{HOMO} = -8.193 \text{ eV}$ | 5.137 eV,<br>T.E.: -<br>828.811<br>KJ/mol |
| <b>NB</b>       | <br>$E_{LUMO} = -2.571 \text{ eV}$ | <br>$E_{HOMO} = -7.459 \text{ eV}$ | 4.887 eV,<br>T.E.: -<br>436.193<br>KJ/mol |
| <b>HL + TNP</b> |                                    |                                    | 2.34 eV,<br>T.E.:<br>-4714.47<br>KJ/mol   |

|                    | $E_{LUMO} = -3.45 \text{ eV}$                                                                                                       | $E_{HOMO} = -5.79 \text{ eV}$                                                                                                        |                                           |
|--------------------|-------------------------------------------------------------------------------------------------------------------------------------|--------------------------------------------------------------------------------------------------------------------------------------|-------------------------------------------|
| <b>1 +<br/>TNP</b> | 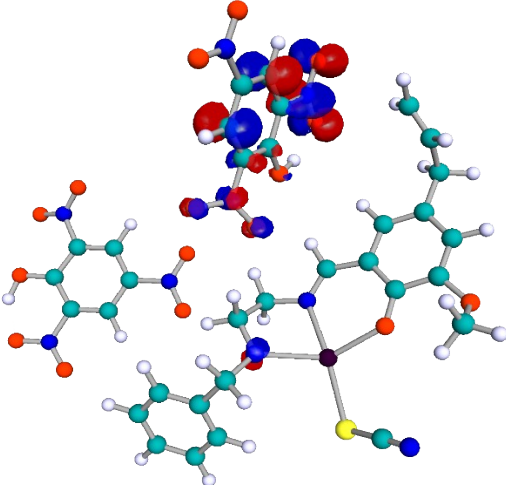 <p><math>E_{LUMO} = -3.499 \text{ eV}</math></p>  |  <p><math>E_{HOMO} = -5.328 \text{ eV}</math></p>  | 1.836 eV,<br>T.E.:<br>-3532.059<br>KJ/mol |
| <b>2 +<br/>TNP</b> |  <p><math>E_{LUMO} = -3.717 \text{ eV}</math></p> |  <p><math>E_{HOMO} = -5.429 \text{ eV}</math></p> | 1.713 eV,<br>T.E.:<br>-3281.43<br>KJ/mol  |

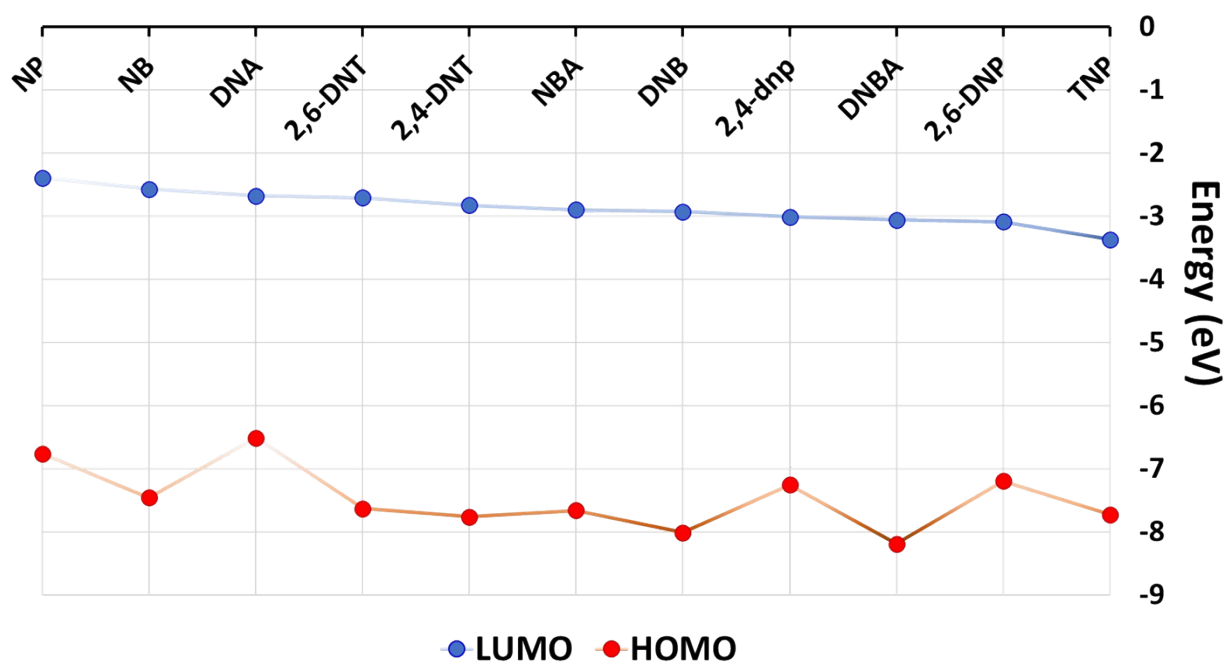

Fig. S50 Graphical depiction of comparative HOMO, LUMO energy levels of nitro-analytes.

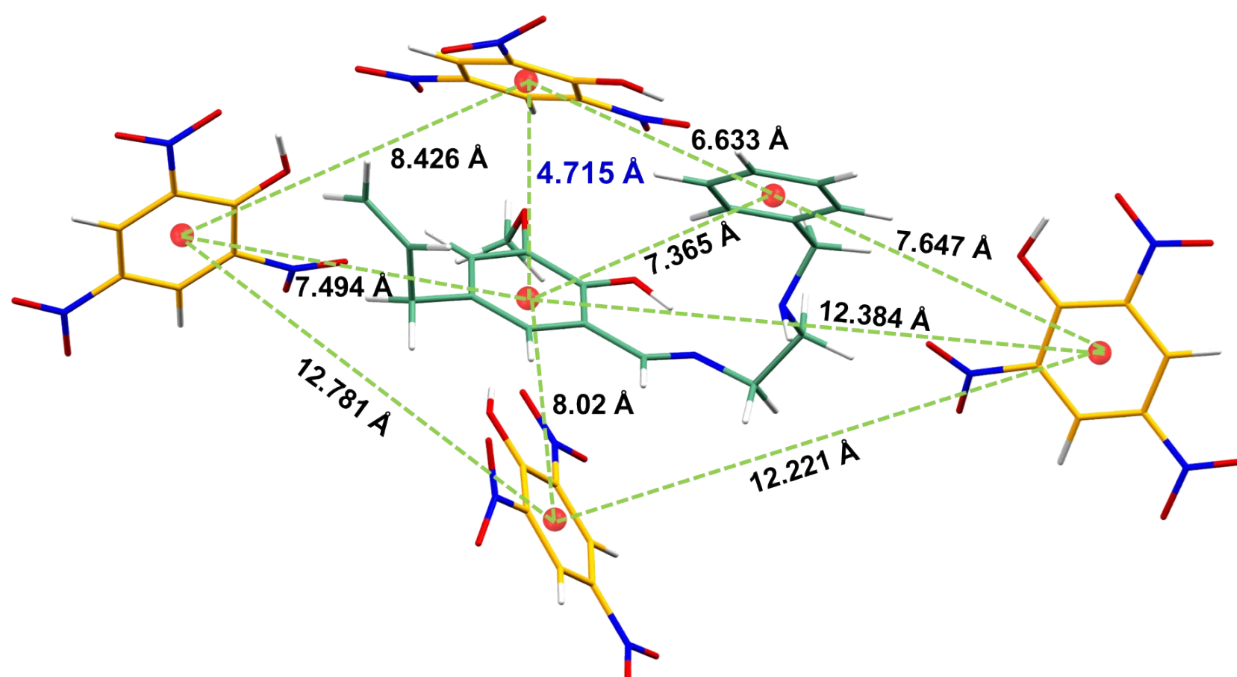

**Fig. S51** Possibility of supramolecular  $\pi$ - $\pi$  interaction, observed from geometry optimized structure of the HL...TNP adduct (obtained from DFT Calculations)

**Table S6** Preparation of complex environmental matrices (CEMs): real-field applications

- (a) Matchstick powder solution (MSPS):** A few Matchsticks were collected from locally available match box, and the sticks were ground by mortar-pestle into a fine powder. It was sonicated in water for ~10-12 minutes. The as-obtained dispersion was passed through a normal filter paper and the filtrate was consequently utilized for preparing the simulated  $10^{-4}$  M TNP solution (MSPS).
- (b) River water (RW):** Water sample was collected from river Mayurakshi, near Suri, West Bengal, India. The water sample was used as it as to prepare a  $10^{-4}$  M TNP solution (RW).
- (c) Sewage Water (SW):** This water specimen was collected from the inlet of the Aqua Rejuvenation Plant (ARP) installed at CSIR-CMERI residential colony ( $\sim 23.5449^\circ$  N,  $87.2918^\circ$  E). The sample was filtered through a normal filter paper to screen out any macroparticles and the filtrate was used to prepare the simulated TNP solution.
- (d) Soil Sample Supernatant (SSS):** The soil sample was collected from Tilpara Mihirlal Barrage, at Mayurakshi river basin, Suri, West Bengal, India. The laterite-based sandy soil sample was dried under sun for sufficient time, finely ground and  $\sim 5$ g of it was stirred in water for  $\sim 15$ - $20$  mins, followed by centrifuging for another  $\sim 10$  min at  $\sim 3500$  rpm. The supernatant (liquid) was accordingly used for preparation of the simulated TNP solution.

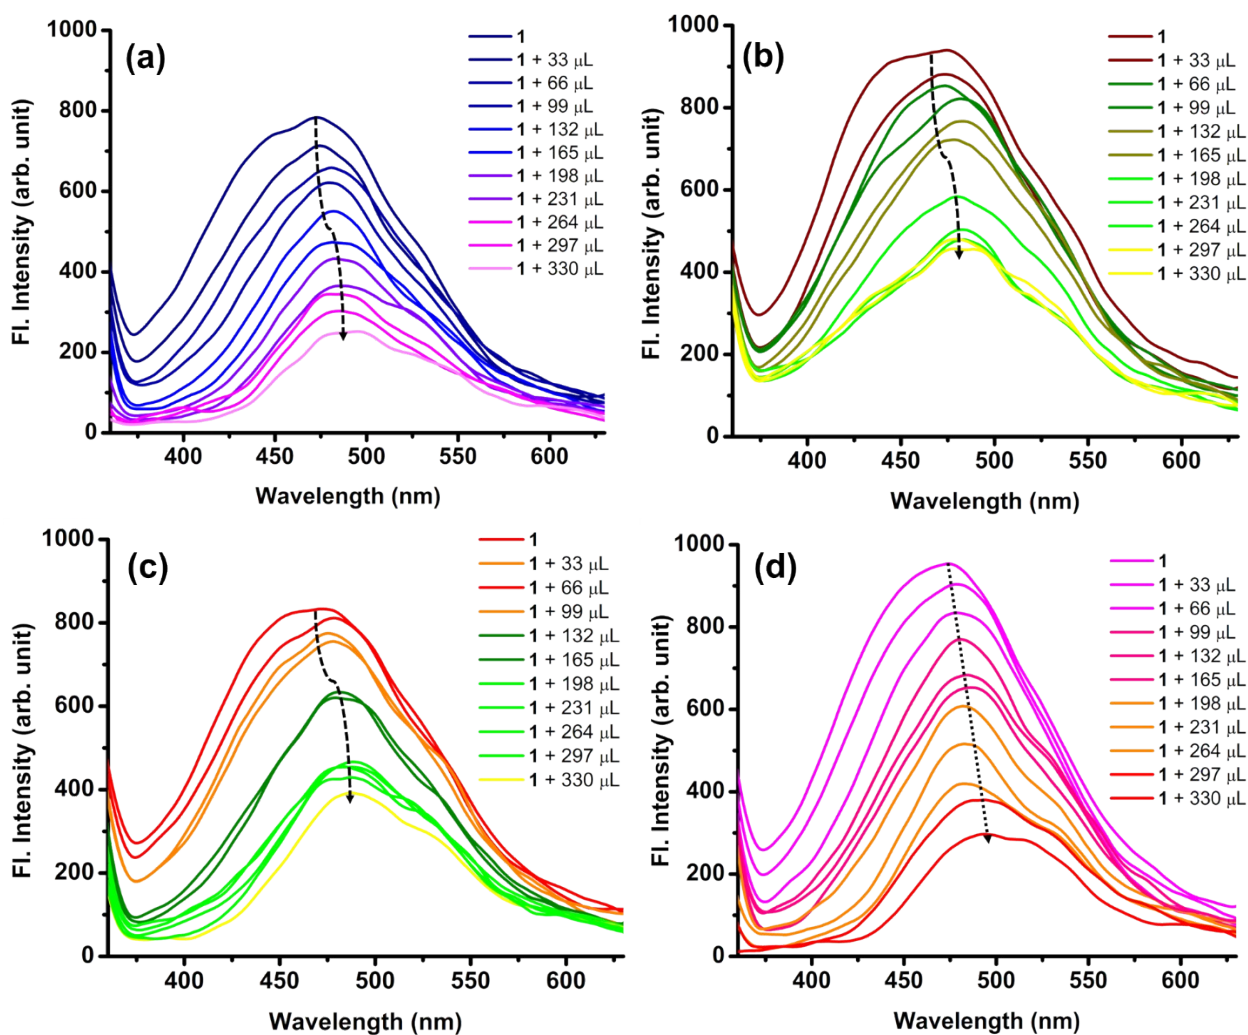

**Fig. S52** Fluorescence Quenching of 1 during incremental addition of  $10^{-4}$ (M) TNP at diverse complex matrices: (a) Matchstick powder solution (MSPS); (b) River Water (RW); (c) Sewage water (SW) and (d) Soil sample supernatant (SSS).

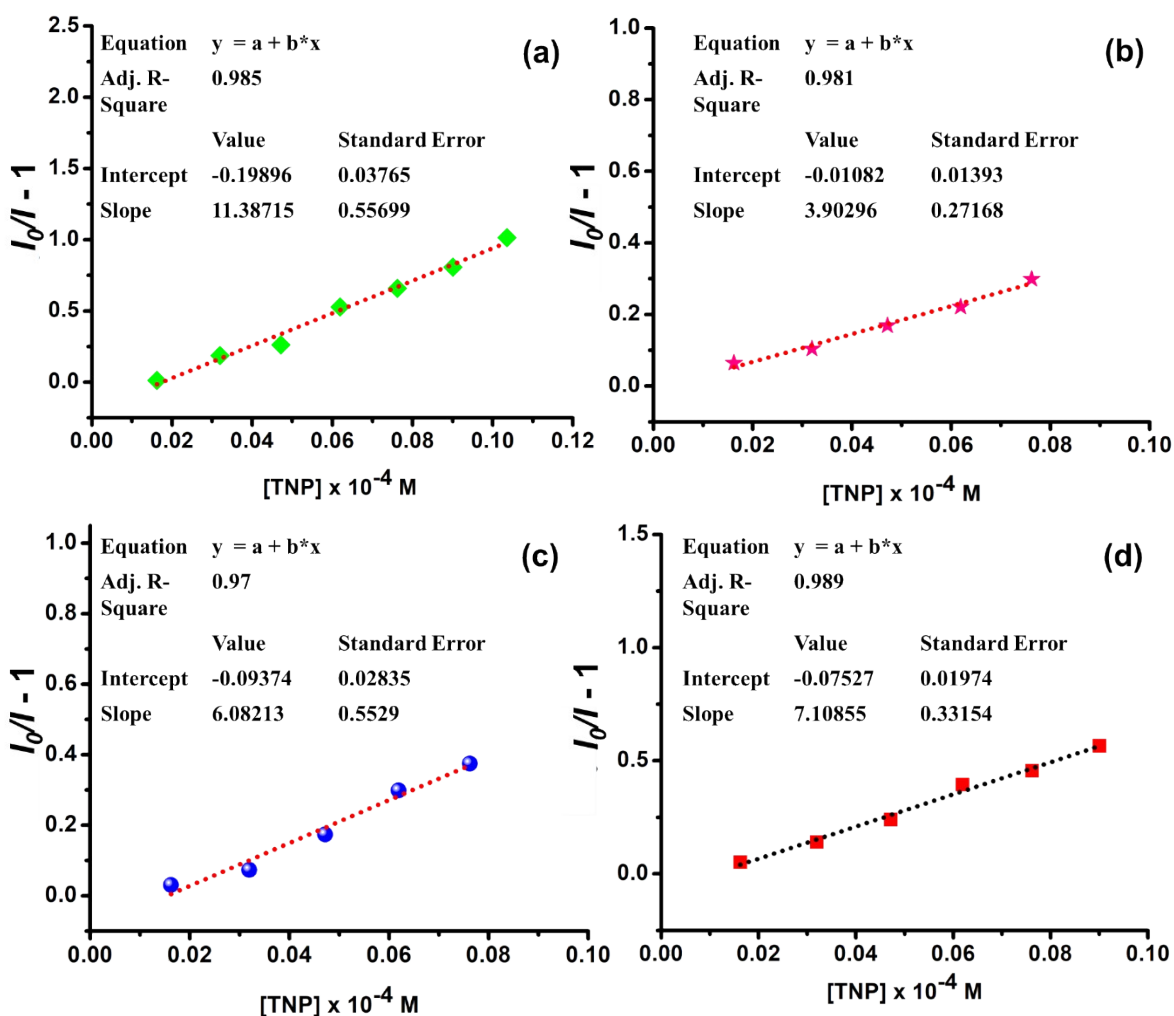

**Fig. S53** Linear range of  $(I_0/I - 1)$  vs Concentration plot for calculation of  $K_{SV}$  as obtained from Figure S51 during fluorescence Quenching of **1** by complex environmental matrices: (a) MSPS; (b) RW; (c) SW and (d) SSS.

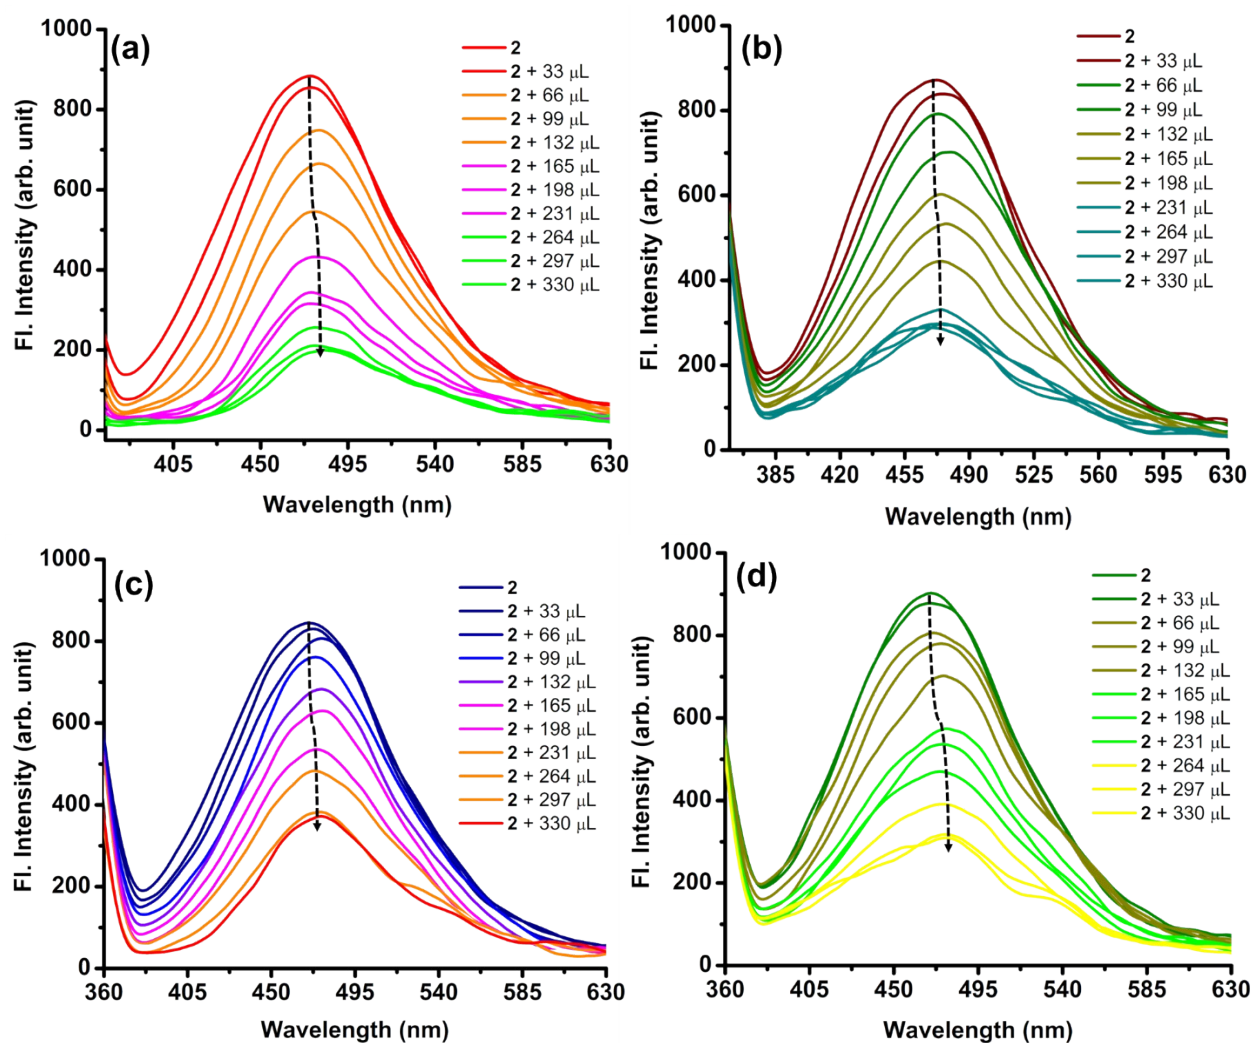

**Fig. S54** Fluorescence Quenching of **2** during incremental addition of  $10^{-4}$ (M) TNP at diverse complex matrices: (a) MSPS; (b) RW; (c) SW and (d) SSS.

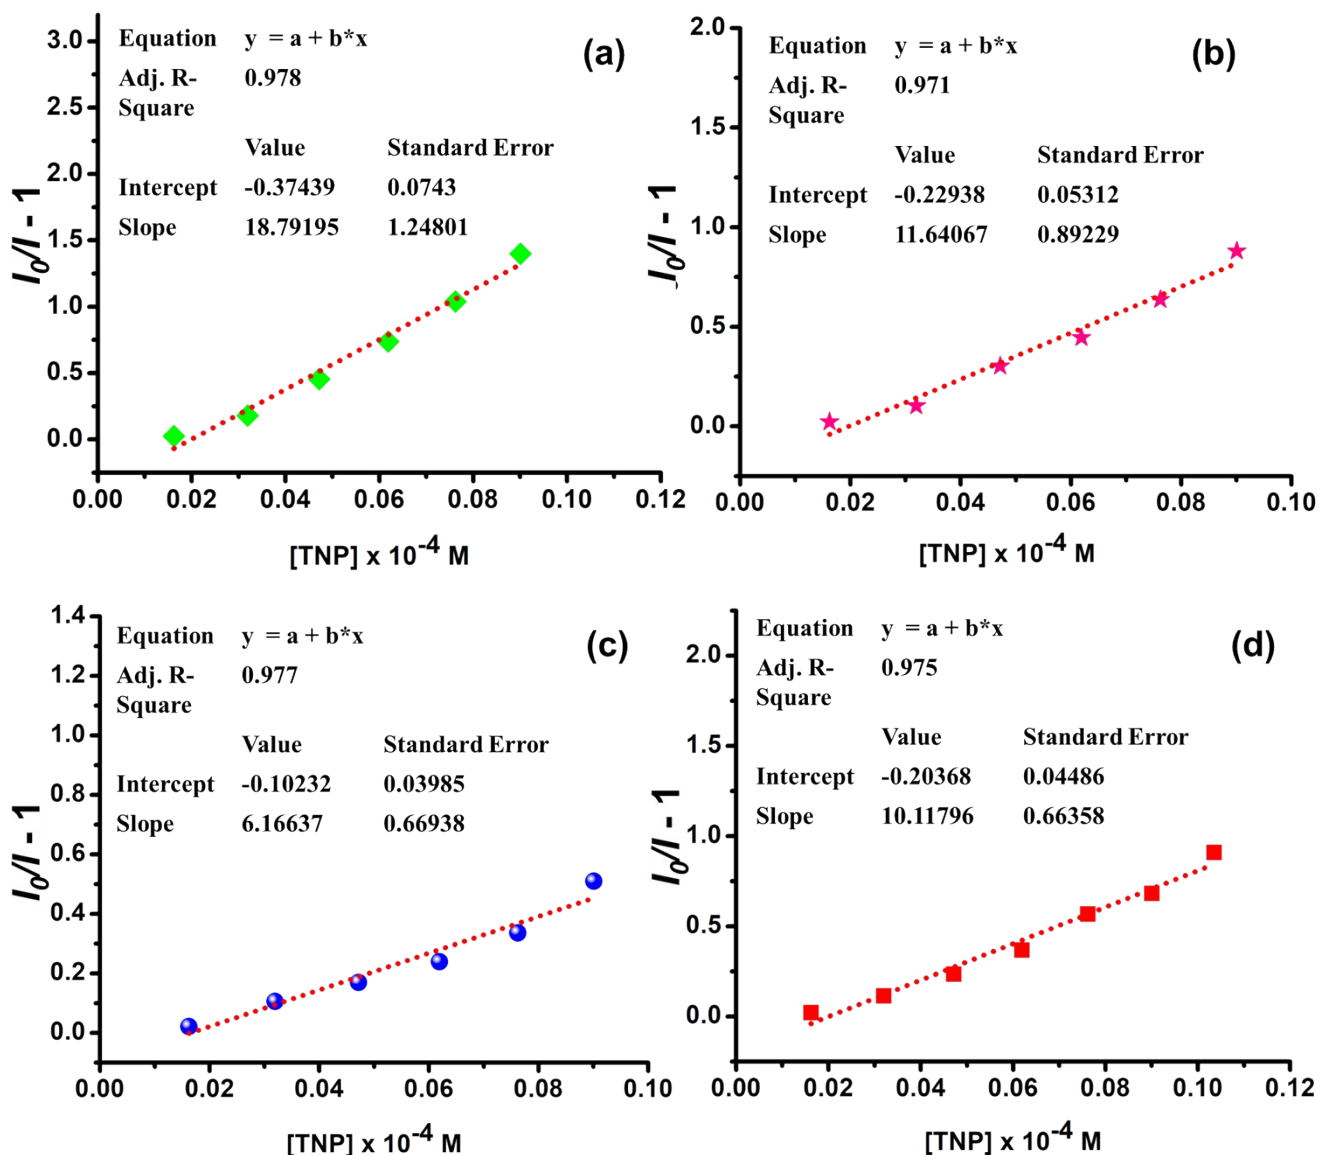

**Fig. S55** Linear range of  $(I_0/I - 1)$  vs Concentration plot for calculation of  $K_{SV}$  as obtained from Figure S53 during fluorescence Quenching of **2** by complex environmental matrices: (a) MSPS; (b) RW; (c) SW and (d) SSS.

**Table S7** Crystal parameters and selected refinement details for CPs **1** and **2**

| Complex           | <b>1</b>                    | <b>2</b>                    |
|-------------------|-----------------------------|-----------------------------|
| CCDC              | 2314429                     | 2314430                     |
| Empirical formula | $C_{21}H_{23}Cd_1N_3O_2S_1$ | $C_{44}H_{45}Cd_2N_{10}O_4$ |
| Formula weight    | 493.88                      | 1002.72                     |
| Temperature (K)   | 200                         | 273                         |
| Crystal system    | Monoclinic                  | Monoclinic                  |
| Space group       | $P2_1/c$                    | $P2_1/n$                    |
| $a$ (Å)           | 14.9384 (3)                 | 14.4942(9)                  |
| $b$ (Å)           | 13.4833 (2)                 | 10.3261(7)                  |
| $c$ (Å)           | 10.6204 (18)                | 15.7836(10)                 |
| $\alpha$ (°)      | 90                          | 90                          |
| $\beta$ (°)       | 97.8443 (16)                | 115.732(2)                  |
| $\gamma$ (°)      | 90                          | 90                          |

|                                                        |                           |                           |
|--------------------------------------------------------|---------------------------|---------------------------|
| Volume (Å <sup>3</sup> )                               | 2119.14 (7)               | 2128.0(2)                 |
| Z                                                      | 4                         | 4                         |
| <i>D</i> <sub>calc</sub> (g cm <sup>-3</sup> )         | 1.548                     | 1.565                     |
| Absorption coefficient (mm <sup>-1</sup> )             | 9.343                     | 1.054                     |
| <i>F</i> (000)                                         | 1000.0                    | 1014.0                    |
| θ Range for data collection (°)                        | 4.415 -77.473             | 1.972-27.159              |
| Reflections collected                                  | 14048                     | 58632                     |
| Independent reflection / <i>R</i> <sub>int</sub>       | 4392/0.0583               | 4713/0.0615               |
| Data / restraints / parameters                         | 4392/0/ 254               | 4713 /0/ 281              |
| Goodness-of-fit on <i>F</i> <sup>2</sup>               | 1.044                     | 1.096                     |
| Final indices[I>2σ(I)]                                 | R1= 0.0337<br>wR1= 0.0859 | R1= 0.0293<br>WR1= 0.0585 |
| <i>R</i> indices (all data)                            | R1= 0.0381<br>wR2= 0.0888 | R1= 0.0385<br>WR1= 0.0635 |
| Largest diff. peak / deepest hole (e Å <sup>-3</sup> ) | 0.659/ -1.011             | 0.522 / -0.463            |

**Table S8** Selected Bond lengths (Å) and Bond angles (°) for CPs **1** and **2**

| <b>1</b>     |                     | <b>2</b>     |                     |
|--------------|---------------------|--------------|---------------------|
| <b>Atoms</b> | <b>Distance (Å)</b> | <b>Atoms</b> | <b>Distance (Å)</b> |
| Cd1–N1       | 2.299(2)            | Cd1–N1       | 2.331(2)            |
| Cd1–N2       | 2.343(2)            | Cd1–N2       | 2.346(2)            |
| Cd1–N3       | 2.242(3)            | Cd1–N3       | 2.266(2)            |
| Cd1–O1       | 2.2467(18)          | Cd1–N5       | 2.387(3)            |
| Cd1–S2       | 2.7440(9)           | Cd1–O1       | 2.2467(17)          |
| Cd1–O1(1)    | 2.3623(19)          | Cd1–O1(1)    | 2.3233(17)          |
| <b>Atoms</b> | <b>Angle (°)</b>    | <b>Atoms</b> | <b>Angle (°)</b>    |
| N2–Cd1–N1    | 75.52               | N1–Cd1–N2    | 74.45               |
| N1–Cd1–O1    | 79.14               | N1–Cd1–N5    | 85.59               |
| O1–Cd1–O1(1) | 82.31               | N5–Cd1–N2    | 101.74              |



|            |          |              |           |
|------------|----------|--------------|-----------|
| O1–Cd1–N2  | 84.46    | O1–Cd1–O1(1) | 78.42     |
| O1–Cd1–N3  | 90.28    | N1–Cd1–O1    | 78.43     |
| N3–Cd1–S2  | 83.14    | N2–Cd1–O1    | 91.13     |
| S2–Cd1–N1  | 93.22    | N3–Cd1–O1    | 102.49    |
| N3–Cd1–N2  | 112.14   | N5–Cd1–O1    | 89.67     |
| Cd1–O1–Cd1 | 97.69(7) | Cd1–O1–Cd1   | 101.57(6) |

**Table S9** Comparison table: recently reported CP-based chemosensors towards TNP detection.

| Entry | Compound                                                                                        | Detection Medium | Analytical Parameters |                                     | Vapour phase sensing | References                                                  |
|-------|-------------------------------------------------------------------------------------------------|------------------|-----------------------|-------------------------------------|----------------------|-------------------------------------------------------------|
|       |                                                                                                 |                  | LOD ( $\mu\text{M}$ ) | $K_{\text{sv}}$ ( $\text{M}^{-1}$ ) |                      |                                                             |
| 1.    | [Cd(NDI-A)(seb)(H <sub>2</sub> O)]                                                              | EtOH             | 0.814                 | $4.75 \times 10^4$                  | No                   | <i>Inorg. Chem.</i> , 2022, <b>61</b> , 26, 10066-10078     |
| 2.    | [Cd(INA)(pytpy)(OH)]·2H <sub>2</sub> O                                                          | DMF              | 2.41                  | $4.3 \times 10^4$                   | No                   | <i>Sens. Actuators B Chem.</i> , 2018, <b>272</b> , 166-174 |
|       |                                                                                                 | H <sub>2</sub> O | 9.1                   | $3.3 \times 10^4$                   |                      |                                                             |
| 3.    | [Zn <sub>2</sub> Na <sub>2</sub> -(TPHC)(4,4-Bipy)(DMF)]·8H <sub>2</sub> O                      | DMF              | 0.64                  | $8.47 \times 10^4$                  | No                   | <i>Inorg. Chem.</i> , 2019, <b>58</b> , 4026-4032           |
| 4.    | [Pb <sub>7</sub> (TTPCA) <sub>4</sub> Cl <sub>2</sub> ]·3H <sub>2</sub> O                       | H <sub>2</sub> O | 1.03                  | $5.22 \times 10^4$                  | No                   | <i>Inorg. Chem.</i> , 2021, <b>60</b> , 7887-7899           |
| 5.    | [Pb <sub>7</sub> (TTPCA) <sub>4</sub> (DMA) <sub>2</sub> (HCOO) <sub>2</sub> ]·H <sub>2</sub> O | H <sub>2</sub> O | 1.03                  | $4.33 \times 10^4$                  | No                   |                                                             |
| 6.    | [Pb <sub>4</sub> (TTPCA) <sub>3</sub> ]·3DMF·2H <sub>2</sub> O·H <sub>3</sub> O                 | H <sub>2</sub> O | 2.63                  | $3.14 \times 10^4$                  | No                   |                                                             |
| 7.    | [Eu <sub>2</sub> (1,4-NDC) <sub>3</sub> (DMF)] <sub>n</sub><br>(2-Eu)                           | H <sub>2</sub> O | 0.89                  | $6.98 \times 10^4$                  | No                   | <i>Cryst. Growth Des.</i> , 2021, <b>21</b> , 6543-655      |
| 8.    | [Cd(L1)(N(CN) <sub>2</sub> )] <sub>n</sub><br>(Compound 1)                                      | H <sub>2</sub> O | 0.68                  | $7.49 \times 10^4$                  | Yes                  | <i>Inorg. Chem.</i> , 2023, <b>62</b> , 1, 98-113           |
| 9.    | [Cd(L1)(NCS)] <sub>n</sub><br>(Compound 2)                                                      | H <sub>2</sub> O | 0.41                  | $8.01 \times 10^4$                  | Yes                  |                                                             |
| 10.   | [Cd <sub>2</sub> (L2) <sub>2</sub> (NCS) <sub>2</sub> ] <sub>n</sub><br>(Compound 3)            | H <sub>2</sub> O | 1.18                  | $8.10 \times 10^4$                  | Yes                  |                                                             |
| 11.   | [Zn-(PBBA)(H <sub>2</sub> O)]·3DMF·2H <sub>2</sub> O                                            | H <sub>2</sub> O | 1.00                  | $4.4 \times 10^4$                   | No                   | <i>Inorg. Chem.</i> , 2023, <b>62</b> , 1272-1278           |
| 12.   | [Zn <sub>2</sub> (NO <sub>3</sub> ) <sub>2</sub> (4,4'-bpy) <sub>2</sub> (TBA)]                 | H <sub>2</sub> O | 6.02                  | $4.83 \times 10^4$                  | No                   | <i>CrystEngComm</i> , 2019, <b>21</b> , 1948-               |

|     |                                                                                                                                                              |                                    |               |                                           |    |                                                         |                                                    |
|-----|--------------------------------------------------------------------------------------------------------------------------------------------------------------|------------------------------------|---------------|-------------------------------------------|----|---------------------------------------------------------|----------------------------------------------------|
|     |                                                                                                                                                              |                                    |               |                                           |    | 1955                                                    |                                                    |
| 13. | $\{[\text{Zn}(\text{L})(\text{H}_2\text{O})_2] \cdot \text{H}_2\text{O}\}$ and $\{[\text{Cd}(\text{L})(\text{H}_2\text{O})_2] \cdot 4\text{H}_2\text{O}\}_n$ | $\text{H}_2\text{O}$               | 0.63 and 0.75 | $9.77 \times 10^4$ and $8.52 \times 10^4$ | No | <i>CrystEngComm</i> , 2019, <b>21</b> , 5185-5194       |                                                    |
| 14. | $\{[\text{Zn}(\text{mbhna})(\text{bpma})]\}_n$                                                                                                               | $\text{H}_2\text{O} + \text{MeOH}$ | 5.89          | $7.8 \times 10^3$                         | No | <i>Dye. Pigment.</i> , 2023, <b>210</b> , 111025        |                                                    |
| 15. | $\{[\text{Cd}(\text{mbhna})(\text{bpma})] \cdot \text{DMF}\}_n$                                                                                              | $\text{H}_2\text{O} + \text{MeOH}$ | 2.29          | $1.09 \times 10^4$                        | No |                                                         |                                                    |
| 16. | $\{[\text{Zn}(\text{mbhna})(\text{bpea})]\}_n$                                                                                                               | $\text{H}_2\text{O} + \text{MeOH}$ | 2.59          | $1.17 \times 10^4$                        | No |                                                         |                                                    |
| 17. | $\{[\text{Cd}(\text{mbhna})(\text{bpea})]\}_n$                                                                                                               | $\text{H}_2\text{O} + \text{MeOH}$ | 2.80          | $8.9 \times 10^3$                         | No |                                                         |                                                    |
| 18. | $\{[\text{Zn}(\text{mbhna})(\text{bpta})]\}_n$                                                                                                               | $\text{H}_2\text{O} + \text{MeOH}$ | 4.80          | $1.7 \times 10^4$                         | No |                                                         |                                                    |
| 19. | $\{[\text{Cd}(\text{mbhna})(\text{bpta})(\text{CH}_3\text{OH})]\}_n$                                                                                         | $\text{H}_2\text{O} + \text{MeOH}$ | 2.06          | $1.6 \times 10^4$                         | No |                                                         |                                                    |
| 20. | $\{[\text{Zn}(\text{mbhna})(\text{bpba})] \cdot \text{CH}_3\text{OH} \cdot \text{H}_2\text{O}\}_n$                                                           | $\text{H}_2\text{O} + \text{MeOH}$ | 1.72          | $1.44 \times 10^4$                        | No |                                                         |                                                    |
| 21. | $\{[\text{Cd}(\text{mbhna})(\text{bpba})]\}_n$                                                                                                               | $\text{H}_2\text{O} + \text{MeOH}$ | 1.05          | $2.84 \times 10^4$                        | No |                                                         |                                                    |
| 22. | $\{[\text{Cd}_4(\text{L})_2(\text{L}_2)_3(\text{H}_2\text{O})_2] \cdot (8\text{DMF})(8\text{H}_2\text{O})\}_n$                                               | Ethanol                            | 4.90          | $3.89 \times 10^4$                        | No |                                                         | <i>Inorg. Chem.</i> , 2016, <b>55</b> , 1741-1747  |
| 23. | $\text{Zn}_2(\text{TZBPDC})(\mu_3\text{-OH})(\text{H}_2\text{O})_2$                                                                                          | $\text{H}_2\text{O}$               | 278.00        | $4.90 \times 10^4$                        | No |                                                         | <i>Chem. Commun.</i> , 2016, <b>52</b> , 5734-5737 |
| 24. | $[(\text{CH}_3)_2\text{NH}_2]_3[\text{Zn}_4\text{Na}(\text{BPTC})_3] \cdot 4\text{CH}_3\text{OH} \cdot 2\text{DMF}$                                          | $\text{H}_2\text{O}$               | 5.00          | $3.2 \times 10^4$                         | No | <i>J. Mater. Chem., A</i> . 2015, <b>3</b> , 7224-7228  |                                                    |
| 25. | $\{[\text{Cd}_3(\text{bmipia})_2] \cdot 10\text{DMF} \cdot 5\text{H}_2\text{O}\}_n$                                                                          | $\text{H}_2\text{O}$               | NA            | $3.82 \times 10^4$                        | No | <i>Cryst. Growth Des.</i> , 2020, <b>20</b> , 1373-1377 |                                                    |
| 26. | $[\{\text{Cd}(\text{fdc})(\text{bpee})_{1.5}\}_3 \cdot (\text{H}_2\text{O})]$                                                                                | EtOH                               | 5.00          | $6.64 \times 10^4$                        | No | <i>Cryst. Growth Des.</i> , 2015, <b>15</b> , 3356-3365 |                                                    |
| 27. | $\{[\text{Cd}_2(\text{tdz})_2(4,4'\text{-bpy})_2] \cdot 6.5\text{H}_2\text{O}\}_n$                                                                           | $\text{H}_2\text{O}$               | 6.30          | $4.86 \times 10^4$                        | No | <i>Dalton Trans.</i> , 2019, <b>48</b> , 2388           |                                                    |
| 28. | $\{[\text{Cd}(\text{L}_1)(\text{L}_2)](\text{DMA})\}_n$ (Cd-MOF1)                                                                                            | $\text{H}_2\text{O}$               | 7.03          | NA                                        | No | <i>New J. Chem.</i> , 2022, <b>46</b> , 8523-8533       |                                                    |
| 29. | $[\text{In}(\text{HTzPTpy})\text{Cl}_2]$                                                                                                                     | $\text{H}_2\text{O}$               | 1.31          | $8.95 \times 10^4$                        | No | <i>New J. Chem.</i> , 2022, <b>46</b> , 1551-           |                                                    |

|     | (CUST-801)                                                                                     |                     |       |                    |     | 1556                                                    |
|-----|------------------------------------------------------------------------------------------------|---------------------|-------|--------------------|-----|---------------------------------------------------------|
| 30. | $[Zn_3(\text{Bip})_3(\text{H}_2\text{sip})_2(\text{H}_2\text{O})_4] \cdot 5\text{H}_2\text{O}$ | H <sub>2</sub> O    | 54.40 | $3.44 \times 10^4$ | No  | <i>New J. Chem.</i> , 2022, <b>46</b> , 22739           |
| 31. | $[\text{Cd}(\text{L1})(\text{SCN})_2\text{H}_2\text{O}]_n$                                     | H <sub>2</sub> O    | 55    | $3.4 \times 10^4$  | No  | <i>Inorg. Chem.</i> , 2024, <b>63</b> , 4527–4544       |
| 32. | $[\text{Cd}_{1.5}(\text{L1})(\text{N}(\text{CN})_2)_3]_n$                                      | H <sub>2</sub> O    | 28    | $6.9 \times 10^4$  | No  |                                                         |
| 33. | $[\text{Cd}(\text{L2})(\text{SCN})_2]_n$                                                       | H <sub>2</sub> O    | 27    | $2.3 \times 10^4$  | No  |                                                         |
| 34. | $[\text{Cd}_{1.5}(\text{L2})(\text{N}(\text{CN})_2)_3]_n$                                      | H <sub>2</sub> O    | 31    | $2.3 \times 10^4$  | No  |                                                         |
| 35. | $[\text{Cd}_2(\text{L}_1)(\text{NCS})_2(\text{CH}_3\text{OH})]_n$                              | DMSO + Acetonitrile | 1.33  | $1.25 \times 10^4$ | No  | <i>Cryst. Growth Des.</i> , 2019, <b>19</b> , 6431–6447 |
| 36. | $\{[\text{Cd}(\text{HL}_1)_2(\text{N}(\text{CN})_2)_2] \cdot \text{H}_2\text{O}\}_n$           | DMSO + Acetonitrile | 0.33  | $1.71 \times 10^4$ | No  |                                                         |
| 37. | $[\text{Cd}(\text{HL}_2)_2(\text{N}(\text{CN})_2)_2]_n$                                        | DMSO + Acetonitrile | 0.16  | $1.82 \times 10^4$ | No  |                                                         |
| 38. | $[\text{Cd}(\text{L})(\text{SCN})]_n$ (CP 1)                                                   | H <sub>2</sub> O    | 0.29  | $5.91 \times 10^4$ | Yes | <b>Present work</b>                                     |
| 39. | $[\text{Cd}(\text{L})(\text{N}(\text{CN})_2)]$ (CP 2)                                          | H <sub>2</sub> O    | 0.15  | $17.6 \times 10^4$ | Yes |                                                         |

**[Abbreviations:** NDI-A= N,N'-di(4-pyridylacylamino)-1,4,5,8-naphthalenediimide; seb = sebacic acid; INA = Isonicotinic acid; pytpy = 4'-(4-Pyridinyl)-2,2':6',2''-terpyridine; TPHC= [1,1':2',1''-terphenyl]-3,3'',4,4',4'',5'-hexacarboxylic acid; 4,4-bipy= 4,4'-bipyridine, DMF = N,N-dimethylformamide; H<sub>3</sub>TTPCA = 1,1',1''-(1,3,5-triazine-2,4,6-triyl)-tripiperidine-4-carboxylic acid; DMA = N,N-dimethylacetamide; 1,4-H<sub>2</sub>NDC = 1,4-naphthalenedicarboxylic acid; HL1 (Entry 8, 9) = schiff based ligand from 3-Ethoxysalicylaldehyde and N-benzyl ethylenediamine; HL2 (Entry 10) = schiff based ligand from o-vanillin and N-benzyl ethylenediamine; PBBA = 4,4'-(2,6-pyrazinediyl)bis[benzoic acid]; H<sub>2</sub>TBA= 4-(1H-tetrazol-5-yl)-benzoic acid; 4,4'-bpy = 4,4'-bipyridine; H<sub>2</sub>L (Entry 13): 5-(4-pyridylamino)isophthalic acid; mbhna = 4,4' -methylene-bis[3-hydroxy-2-naphthalene carboxylate; bpxa (Entry 14-21) = N,N' -bis(pyridylmethyl)alkylamine with x = m (methyl), e (ethyl), t (tert-butyl) or b (benzyl); H<sub>4</sub>L(Entry 22) = [1,1':3',1''-terphenyl]-4,4',4'',6'-tetracarboxylic acid; L<sub>2</sub>= 2-amino-4,4'-bipyridine; BPTC= biphenyl-3,3',5,5'-tetracarboxylic acid; H<sub>6</sub>bmipia: 5-[N,N-bis(5-methylisophthalic acid)amion] isophthalic acid; fdc = 2,5-furandicarboxylate dianion; bpee = 1,2-bis(4-pyridyl)ethylene; H<sub>2</sub>tdz= thiadiazole dicarboxylate; L<sub>1</sub> (Entry 28) = 2-amino-1,4-benzenedicarboxylate; L<sub>2</sub> (Entry 28) = 4,4'-azopyridine; HTzPTpy = 4-(tetrazole-5-yl)phenyl-[2,2':6',2''-terpyridine); Bip = 3,5-bis(imidazole-1-yl)pyridine; H<sub>2</sub>sip = 5-sulfoisophthalic acid, L1(Entry 31,32) = schiff based ligand from 3-formylchromone and N,N-diethylethylenediamine, L2(Entry 33,34) = schiff based ligand from 3-formylchromone and N,N-dimethylethylenediamine, HL<sub>1</sub>(Entry 35,36) = schiff based ligand from 3- aminoquinoline and o-vanillin, HL<sub>2</sub>(Entry 37) = schiff based ligand from 5- aminoquinoline and o-vanillin]
